# Supplementary material for: CuBr-mediated radical cascade difluoroacetamidation of acrylamides using α,α-difluoro-α-(TMS)-acetamides
Source: Royal Society of Chemistry journal article supplement (doi:10.1039/c7qo00209b), 2017-01-01

# Supporting Information

## CuBr-Mediated Radical Cascade Difluoroacetamidation of Acrylamides Using $\alpha,\alpha$ -Difluoro- $\alpha$ -(TMS)-acetamides

Kai Liu,<sup>a</sup> Lin-Chao Sui,<sup>a</sup> Qiao Jin,<sup>a</sup> Deng-Yuan Li,<sup>a</sup> and Pei-Nian Liu\*<sup>a</sup>

*Shanghai Key Laboratory of Functional Materials Chemistry, Key Laboratory for Advanced Materials and and  
School of Chemistry & Molecular Engineering, East China University of Science and Technology, Meilong*

*Road 130, Shanghai, 200237, China*

*liupn@ecust.edu.cn*

### Table of Contents

|                                                                                                                                                      |       |
|------------------------------------------------------------------------------------------------------------------------------------------------------|-------|
| 1. General information.....                                                                                                                          | 2     |
| 2. General procedure for the reaction of <i>N</i> -(arylsulfonyl)acrylamides and $\alpha,\alpha$ -difluoro- $\alpha$ -(TMS)-acetamides, 4 and 5..... | 2-3   |
| 3. The mechanism study.....                                                                                                                          | 3-4   |
| 4. X-ray structure of 3p.....                                                                                                                        | 5-13  |
| 5. Analytical data of products.....                                                                                                                  | 14-28 |
| 6. <sup>1</sup> H NMR, <sup>13</sup> C NMR and <sup>19</sup> F NMR Spectra of products.....                                                          | 29-64 |

## 1. General information

All manipulations were carried out in a sealed tube under a nitrogen atmosphere using standard Schlenk techniques. The solvents were distilled under nitrogen from sodium-benzophenone (THF, toluene, dioxane) or calcium hydride (DMF, MeCN, 1,2-DCE) before used. The *N*-(arylsulfonyl)acrylamides and  $\alpha,\alpha$ -difluoro- $\alpha$ -(TMS)-acetamide were prepared according to the literature methods (reference 5 and 19 in the manuscript). Other chemicals were obtained from commercial sources, and were used without further purification. Chemical shifts ( $\delta$ , ppm) in the  $^1\text{H}$  NMR spectra were recorded using TMS as internal standard. Chemical shifts in  $^{13}\text{C}\{^1\text{H}\}$  NMR spectra were internally referenced to  $\text{CHCl}_3$  ( $\delta = 77.16$  ppm).

## 2. General procedures for the reactions of *N*-(arylsulfonyl)acrylamides and $\alpha,\alpha$ -difluoro- $\alpha$ -(TMS)-acetamides, **4** and **5**.

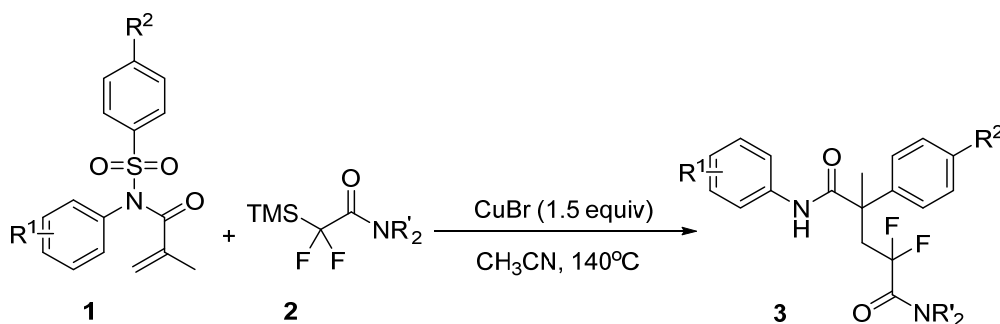

**1** (0.2 mmol), **2** (0.4 mmol),  $\text{CuBr}$  (42.9 mg, 0.3 mmol) and  $\text{CH}_3\text{CN}$  (2 mL) were mixed in an oven-dried sealed tube under  $\text{N}_2$ . The tube was sealed and heated at  $140^\circ\text{C}$  for 6-9h. The resulting mixture was cooled to room temperature and the solvent was evaporated under vacuum. The crude product was purified by column chromatography on silica gel to afford the product **3**.

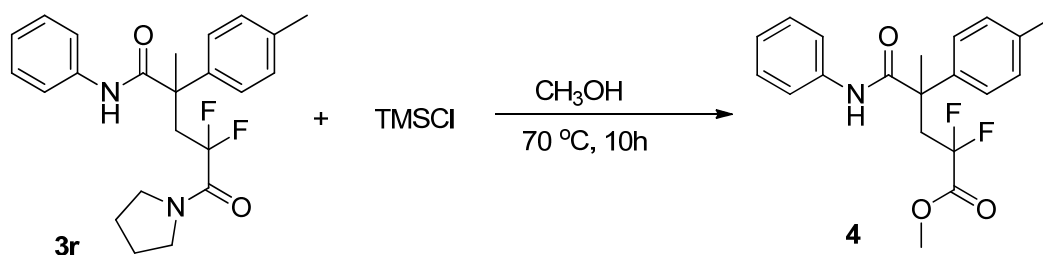

A 10 mL Schlenk tube was charged with **3r** (0.207 mmol, 83 mg), methanol (2 mL), and a magnetic stirring bar. At 0 °C, Me<sub>3</sub>SiCl (5.17 mmol, 25 equiv) was added and the mixture was stirred at 70 °C for 10 h. The reaction was quenched with H<sub>2</sub>O and extracted with diethyl ether. The organic phase was dried over sodium sulfate, concentrated in vacuo, and purified by column chromatography (PE:EA = 10:1) to afford the product **4** (68.0 mg, 91% yield) as a colorless oil.

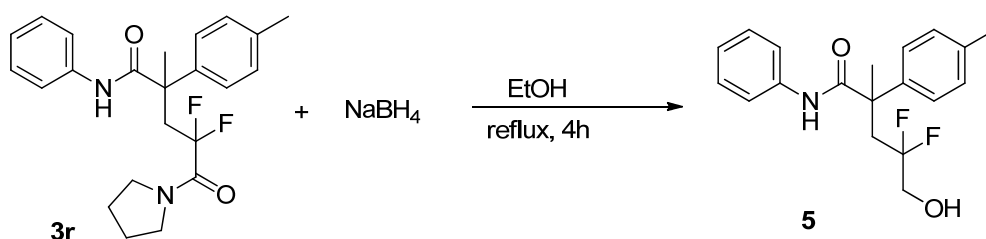

In a 25 mL round flask, difluoroamidated oxindole **3r** (0.227 mmol, 91 mg), sodium borohydride (3.41 mmol, 129.0 mg), a magnetic stirring bar, and ethanol (10 mL) were added under N<sub>2</sub>. The resulting suspension was refluxed for 4 h. Then, the mixture was cooled to room temperature, quenched with aqueous HCl (1 M), and extracted with diethyl ether. The organic phase was concentrated in vacuo and purified by column chromatography (PE:EA = 3:1), affording the product **5** (64.4 mg, 85% yield) as a colorless oil.

### 3. The mechanistic study.

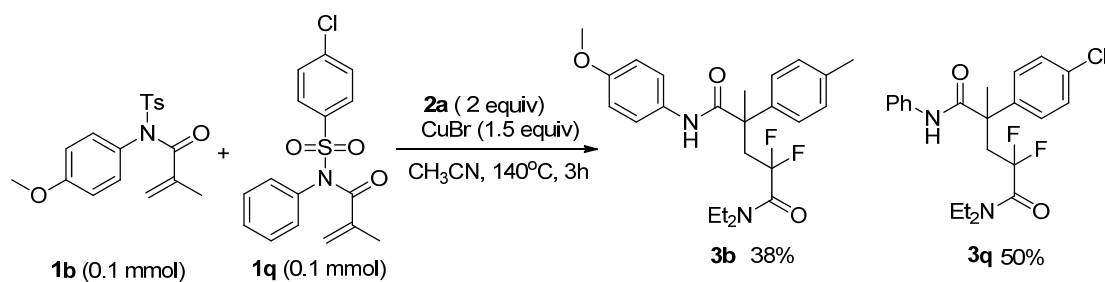

**1b** (0.1 mmol), **1q** (0.1 mmol), **2a** (0.4 mmol), CuBr (42.9 mg, 0.3 mmol) and CH<sub>3</sub>CN (2 mL) were mixed in an oven-dried sealed tube under N<sub>2</sub>. The tube was sealed and heated at 140 °C for 3h. The resulting mixture was cooled to room temperature and the solvent was evaporated under vacuum. The crude product was purified by column chromatography on silica gel to afford the product **3b** (16.4 mg, 38%) and **3q** (21.1 mg, 50%).

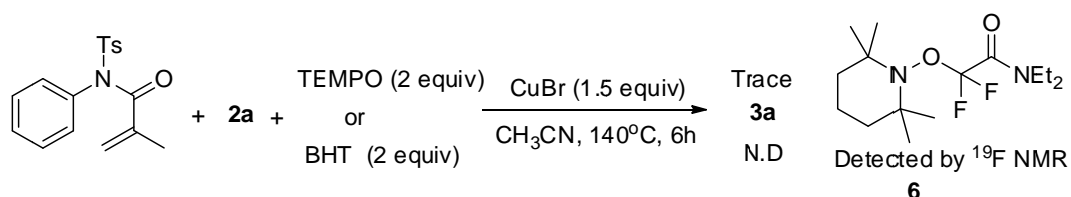

The reactions were carried out according to the general procedures. When TEMPO (2 equiv) was added to the system, only trace target product **3a** was detected. The radical trapping product **6** was detected by the <sup>19</sup>F NMR. When BHT was added to the system, the reaction was completed hampered.

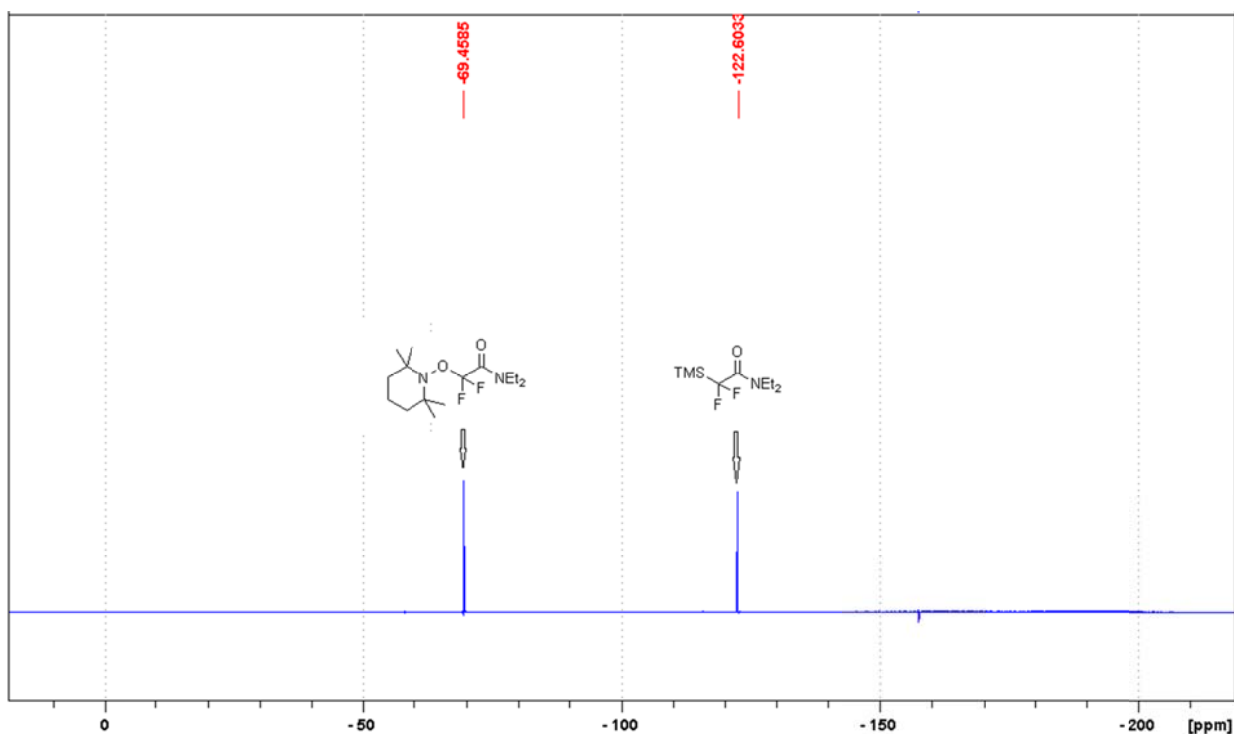

#### 4. X-ray structure of 3p.

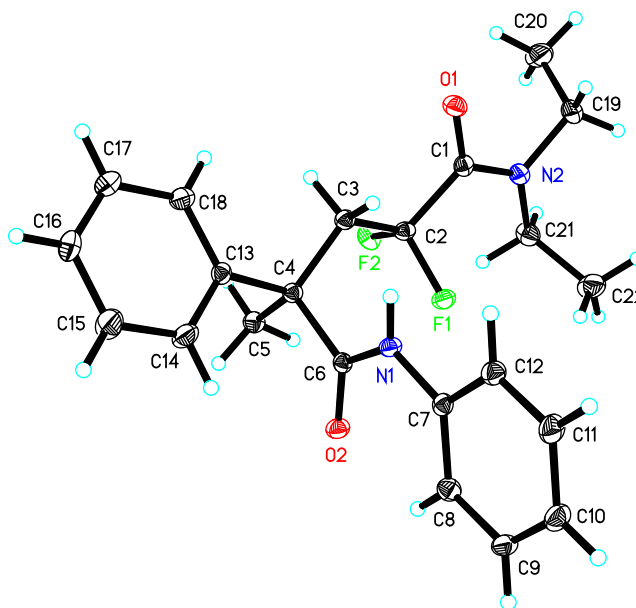

**Table 1.** Crystal data and structure refinement for **3p** (The ORTEP diagram of **3p** with ellipsoids shown at the 30% probability level).

|                      |                                                                              |                 |
|----------------------|------------------------------------------------------------------------------|-----------------|
| Identification code  | <b>3p</b>                                                                    |                 |
| CCDC No.             | 1538133                                                                      |                 |
| Empirical formula    | C <sub>22</sub> H <sub>26</sub> F <sub>2</sub> N <sub>2</sub> O <sub>2</sub> |                 |
| Formula weight       | 388.45                                                                       |                 |
| Temperature          | 133(2) K                                                                     |                 |
| Wavelength           | 0.71073 Å                                                                    |                 |
| Crystal system       | Monoclinic                                                                   |                 |
| Space group          | P 21/c                                                                       |                 |
| Unit cell dimensions | a = 8.7598(9) Å                                                              | a = 90°.        |
|                      | b = 25.852(3) Å                                                              | b = 96.431(2)°. |
|                      | c = 8.8958(9) Å                                                              | g = 90°.        |
| Volume               | 2001.9(4) Å <sup>3</sup>                                                     |                 |
| Z                    | 4                                                                            |                 |

|                                   |                                             |
|-----------------------------------|---------------------------------------------|
| Density (calculated)              | 1.289 Mg/m <sup>3</sup>                     |
| Absorption coefficient            | 0.095 mm <sup>-1</sup>                      |
| F(000)                            | 824                                         |
| Crystal size                      | 0.200 x 0.180 x 0.120 mm <sup>3</sup>       |
| Theta range for data collection   | 2.340 to 25.492°.                           |
| Index ranges                      | -10<=h<=9, -31<=k<=27, -10<=l<=10           |
| Reflections collected             | 13847                                       |
| Independent reflections           | 3727 [R(int) = 0.0376]                      |
| Completeness to theta = 25.242°   | 100.0 %                                     |
| Absorption correction             | Semi-empirical from equivalents             |
| Max. and min. transmission        | 0.7456 and 0.6811                           |
| Refinement method                 | Full-matrix least-squares on F <sup>2</sup> |
| Data / restraints / parameters    | 3727 / 0 / 261                              |
| Goodness-of-fit on F <sup>2</sup> | 1.010                                       |
| Final R indices [I>2sigma(I)]     | R1 = 0.0381, wR2 = 0.0827                   |
| R indices (all data)              | R1 = 0.0599, wR2 = 0.0932                   |
| Extinction coefficient            | 0.0052(7)                                   |
| Largest diff. peak and hole       | 0.242 and -0.192 e.Å <sup>-3</sup>          |

**Table 2.** Atomic coordinates ( $\times 10^4$ ) and equivalent isotropic displacement parameters ( $\text{\AA}^2 \times 10^3$ ) for **3p**.  $U(\text{eq})$  is defined as one third of the trace of the orthogonalized  $U_{ij}$  tensor.

|       | x        | y       | z        | U(eq) |
|-------|----------|---------|----------|-------|
| F(1)  | 2221(1)  | 5434(1) | 7094(1)  | 28(1) |
| F(2)  | 4206(1)  | 5041(1) | 8295(1)  | 28(1) |
| N(1)  | 475(2)   | 6317(1) | 8652(2)  | 21(1) |
| N(2)  | 1832(2)  | 4346(1) | 6909(2)  | 26(1) |
| O(1)  | 1174(1)  | 4460(1) | 9285(1)  | 27(1) |
| O(2)  | 2665(1)  | 6616(1) | 7807(1)  | 25(1) |
| C(1)  | 1818(2)  | 4613(1) | 8195(2)  | 22(1) |
| C(2)  | 2659(2)  | 5138(1) | 8354(2)  | 21(1) |
| C(3)  | 2430(2)  | 5429(1) | 9780(2)  | 21(1) |
| C(4)  | 2983(2)  | 5999(1) | 9844(2)  | 19(1) |
| C(5)  | 4682(2)  | 6045(1) | 9569(2)  | 24(1) |
| C(6)  | 2029(2)  | 6336(1) | 8649(2)  | 19(1) |
| C(7)  | -651(2)  | 6604(1) | 7729(2)  | 20(1) |
| C(8)  | -303(2)  | 6968(1) | 6660(2)  | 24(1) |
| C(9)  | -1486(2) | 7230(1) | 5807(2)  | 27(1) |
| C(10) | -3001(2) | 7135(1) | 5993(2)  | 30(1) |
| C(11) | -3347(2) | 6774(1) | 7053(2)  | 31(1) |
| C(12) | -2180(2) | 6509(1) | 7911(2)  | 26(1) |
| C(13) | 2875(2)  | 6241(1) | 11415(2) | 21(1) |
| C(14) | 2709(2)  | 6770(1) | 11547(2) | 36(1) |
| C(15) | 2800(2)  | 7012(1) | 12944(2) | 41(1) |
| C(16) | 3045(2)  | 6725(1) | 14248(2) | 31(1) |
| C(17) | 3209(2)  | 6199(1) | 14145(2) | 36(1) |

|       |         |         |          |       |
|-------|---------|---------|----------|-------|
| C(18) | 3135(2) | 5959(1) | 12743(2) | 32(1) |
| C(19) | 1045(2) | 3842(1) | 6810(2)  | 35(1) |
| C(20) | 2048(3) | 3417(1) | 7563(2)  | 50(1) |
| C(21) | 2697(2) | 4465(1) | 5623(2)  | 32(1) |
| C(22) | 1690(3) | 4662(1) | 4242(2)  | 42(1) |

**Table 3.**

Bond lengths [ $\text{\AA}$ ] and angles [ $^\circ$ ] for **3p**.

|            |            |
|------------|------------|
| F(1)-C(2)  | 1.3753(18) |
| F(2)-C(2)  | 1.3850(18) |
| N(1)-C(6)  | 1.362(2)   |
| N(1)-C(7)  | 1.420(2)   |
| N(1)-H(1)  | 0.879(18)  |
| N(2)-C(1)  | 1.337(2)   |
| N(2)-C(19) | 1.472(2)   |
| N(2)-C(21) | 1.474(2)   |
| O(1)-C(1)  | 1.2401(19) |
| O(2)-C(6)  | 1.2201(18) |
| C(1)-C(2)  | 1.544(2)   |
| C(2)-C(3)  | 1.507(2)   |
| C(3)-C(4)  | 1.549(2)   |
| C(3)-H(3A) | 0.9900     |
| C(3)-H(3B) | 0.9900     |
| C(4)-C(5)  | 1.540(2)   |
| C(4)-C(13) | 1.544(2)   |
| C(4)-C(6)  | 1.546(2)   |
| C(5)-H(5A) | 0.9800     |
| C(5)-H(5B) | 0.9800     |
| C(5)-H(5C) | 0.9800     |



|              |          |
|--------------|----------|
| C(7)-C(12)   | 1.389(2) |
| C(7)-C(8)    | 1.395(2) |
| C(8)-C(9)    | 1.389(2) |
| C(8)-H(8)    | 0.9500   |
| C(9)-C(10)   | 1.378(2) |
| C(9)-H(9)    | 0.9500   |
| C(10)-C(11)  | 1.383(2) |
| C(10)-H(10)  | 0.9500   |
| C(11)-C(12)  | 1.387(2) |
| C(11)-H(11)  | 0.9500   |
| C(12)-H(12)  | 0.9500   |
| C(13)-C(14)  | 1.382(2) |
| C(13)-C(18)  | 1.385(2) |
| C(14)-C(15)  | 1.385(2) |
| C(14)-H(14)  | 0.9500   |
| C(15)-C(16)  | 1.374(3) |
| C(15)-H(15)  | 0.9500   |
| C(16)-C(17)  | 1.370(3) |
| C(16)-H(16)  | 0.9500   |
| C(17)-C(18)  | 1.388(2) |
| C(17)-H(17)  | 0.9500   |
| C(18)-H(18)  | 0.9500   |
| C(19)-C(20)  | 1.515(3) |
| C(19)-H(19A) | 0.9900   |
| C(19)-H(19B) | 0.9900   |
| C(20)-H(20A) | 0.9800   |
| C(20)-H(20B) | 0.9800   |
| C(20)-H(20C) | 0.9800   |
| C(21)-C(22)  | 1.519(3) |

|                  |            |
|------------------|------------|
| C(21)-H(21A)     | 0.9900     |
| C(21)-H(21B)     | 0.9900     |
| C(22)-H(22A)     | 0.9800     |
| C(22)-H(22B)     | 0.9800     |
| C(22)-H(22C)     | 0.9800     |
| C(6)-N(1)-C(7)   | 127.52(14) |
| C(6)-N(1)-H(1)   | 119.2(12)  |
| C(7)-N(1)-H(1)   | 113.2(12)  |
| C(1)-N(2)-C(19)  | 117.29(14) |
| C(1)-N(2)-C(21)  | 127.67(14) |
| C(19)-N(2)-C(21) | 114.62(14) |
| O(1)-C(1)-N(2)   | 123.56(15) |
| O(1)-C(1)-C(2)   | 117.62(14) |
| N(2)-C(1)-C(2)   | 118.82(14) |
| F(1)-C(2)-F(2)   | 104.75(11) |
| F(1)-C(2)-C(3)   | 110.91(13) |
| F(2)-C(2)-C(3)   | 110.21(13) |
| F(1)-C(2)-C(1)   | 109.10(13) |
| F(2)-C(2)-C(1)   | 107.25(12) |
| C(3)-C(2)-C(1)   | 114.14(13) |
| C(2)-C(3)-C(4)   | 115.77(12) |
| C(2)-C(3)-H(3A)  | 108.3      |
| C(4)-C(3)-H(3A)  | 108.3      |
| C(2)-C(3)-H(3B)  | 108.3      |
| C(4)-C(3)-H(3B)  | 108.3      |
| H(3A)-C(3)-H(3B) | 107.4      |
| C(5)-C(4)-C(13)  | 105.73(13) |
| C(5)-C(4)-C(6)   | 107.76(12) |

|                   |            |
|-------------------|------------|
| C(13)-C(4)-C(6)   | 108.05(12) |
| C(5)-C(4)-C(3)    | 111.81(13) |
| C(13)-C(4)-C(3)   | 111.60(12) |
| C(6)-C(4)-C(3)    | 111.60(13) |
| C(4)-C(5)-H(5A)   | 109.5      |
| C(4)-C(5)-H(5B)   | 109.5      |
| H(5A)-C(5)-H(5B)  | 109.5      |
| C(4)-C(5)-H(5C)   | 109.5      |
| H(5A)-C(5)-H(5C)  | 109.5      |
| H(5B)-C(5)-H(5C)  | 109.5      |
| O(2)-C(6)-N(1)    | 123.25(15) |
| O(2)-C(6)-C(4)    | 120.49(14) |
| N(1)-C(6)-C(4)    | 116.20(13) |
| C(12)-C(7)-C(8)   | 119.08(15) |
| C(12)-C(7)-N(1)   | 117.15(14) |
| C(8)-C(7)-N(1)    | 123.77(15) |
| C(9)-C(8)-C(7)    | 119.59(16) |
| C(9)-C(8)-H(8)    | 120.2      |
| C(7)-C(8)-H(8)    | 120.2      |
| C(10)-C(9)-C(8)   | 121.17(16) |
| C(10)-C(9)-H(9)   | 119.4      |
| C(8)-C(9)-H(9)    | 119.4      |
| C(9)-C(10)-C(11)  | 119.29(16) |
| C(9)-C(10)-H(10)  | 120.4      |
| C(11)-C(10)-H(10) | 120.4      |
| C(10)-C(11)-C(12) | 120.24(16) |
| C(10)-C(11)-H(11) | 119.9      |
| C(12)-C(11)-H(11) | 119.9      |
| C(11)-C(12)-C(7)  | 120.63(16) |

|                     |            |
|---------------------|------------|
| C(11)-C(12)-H(12)   | 119.7      |
| C(7)-C(12)-H(12)    | 119.7      |
| C(14)-C(13)-C(18)   | 117.26(15) |
| C(14)-C(13)-C(4)    | 119.72(14) |
| C(18)-C(13)-C(4)    | 122.49(15) |
| C(13)-C(14)-C(15)   | 121.75(16) |
| C(13)-C(14)-H(14)   | 119.1      |
| C(15)-C(14)-H(14)   | 119.1      |
| C(16)-C(15)-C(14)   | 120.16(18) |
| C(16)-C(15)-H(15)   | 119.9      |
| C(14)-C(15)-H(15)   | 119.9      |
| C(17)-C(16)-C(15)   | 119.09(16) |
| C(17)-C(16)-H(16)   | 120.5      |
| C(15)-C(16)-H(16)   | 120.5      |
| C(16)-C(17)-C(18)   | 120.64(17) |
| C(16)-C(17)-H(17)   | 119.7      |
| C(18)-C(17)-H(17)   | 119.7      |
| C(13)-C(18)-C(17)   | 121.10(17) |
| C(13)-C(18)-H(18)   | 119.4      |
| C(17)-C(18)-H(18)   | 119.4      |
| N(2)-C(19)-C(20)    | 111.77(16) |
| N(2)-C(19)-H(19A)   | 109.3      |
| C(20)-C(19)-H(19A)  | 109.3      |
| N(2)-C(19)-H(19B)   | 109.3      |
| C(20)-C(19)-H(19B)  | 109.3      |
| H(19A)-C(19)-H(19B) | 107.9      |
| C(19)-C(20)-H(20A)  | 109.5      |
| C(19)-C(20)-H(20B)  | 109.5      |
| H(20A)-C(20)-H(20B) | 109.5      |

|                     |            |
|---------------------|------------|
| C(19)-C(20)-H(20C)  | 109.5      |
| H(20A)-C(20)-H(20C) | 109.5      |
| H(20B)-C(20)-H(20C) | 109.5      |
| N(2)-C(21)-C(22)    | 113.28(16) |
| N(2)-C(21)-H(21A)   | 108.9      |
| C(22)-C(21)-H(21A)  | 108.9      |
| N(2)-C(21)-H(21B)   | 108.9      |
| C(22)-C(21)-H(21B)  | 108.9      |
| H(21A)-C(21)-H(21B) | 107.7      |
| C(21)-C(22)-H(22A)  | 109.5      |
| C(21)-C(22)-H(22B)  | 109.5      |
| H(22A)-C(22)-H(22B) | 109.5      |
| C(21)-C(22)-H(22C)  | 109.5      |
| H(22A)-C(22)-H(22C) | 109.5      |
| H(22B)-C(22)-H(22C) | 109.5      |

---

Symmetry transformations used to generate equivalent atoms:

## 5. Analytical data of products.

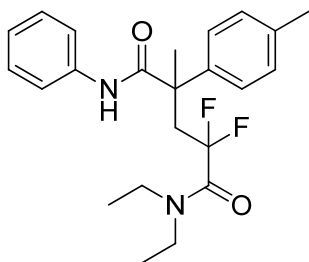

***N*<sup>1</sup>,*N*<sup>1</sup>-diethyl-2,2-difluoro-4-methyl-*N*<sup>5</sup>-phenyl-4-(*p*-tolyl)pentanediamide (3a).** The compound **3a** was obtained in 78% yield (62.7 mg) as colorless liquid after column chromatography (PE/EA=15:1). <sup>1</sup>H NMR (400 MHz, CDCl<sub>3</sub>) δ 1.01 (3H, t, *J* = 7.1 Hz), 1.07 (3H, t, *J* = 7.1 Hz), 1.79 (3H, s), 2.27 (3H, s), 2.80 (1H, m), 3.16-3.40 (5H, m), 6.93 (1H, brs), 6.99 (1H, t, *J* = 7.32 Hz), 7.11 (2H, d, *J* = 8.0 Hz), 7.17-7.21 (2H, m), 7.25-7.31 (4H, m); <sup>13</sup>C NMR (100 MHz, CDCl<sub>3</sub>) δ 12.4, 14.4, 21.1, 23.7, 41.9, 42.3 (t, *J* = 5.96 Hz), 42.4 (t, *J* = 21.4 Hz), 49.1, 119.2 (t, *J* = 254.0 Hz), 120.1, 124.4, 126.5, 128.9, 129.7, 137.4, 137.9, 139.9, 163.0 (t, *J* = 28.5 Hz), 173.8; <sup>19</sup>F NMR (CDCl<sub>3</sub>, 376 MHz) δ -94.6 (d, *J* = 270.8 Hz), -96.2 (d, *J* = 271.0 Hz); HRMS (EI, TOF) calcd for C<sub>23</sub>H<sub>28</sub>F<sub>2</sub>N<sub>2</sub>O<sub>2</sub><sup>+</sup> [M]<sup>+</sup>: 402.2119, found: 402.2125.

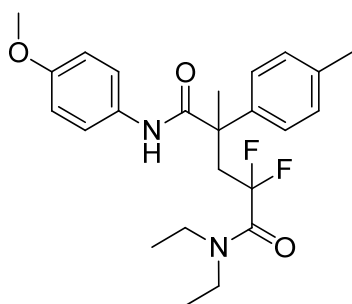

***N*<sup>1</sup>,*N*<sup>1</sup>-diethyl-2,2-difluoro-*N*<sup>5</sup>-(4-methoxyphenyl)-4-methyl-4-phenylpentanediamide (3b).** The compound **3b** was obtained in 82% yield (71.0 mg) as colorless liquid after column chromatography (PE/EA=15:1). <sup>1</sup>H NMR (400 MHz, CDCl<sub>3</sub>) δ 1.01 (3H, t, *J* = 7.1 Hz), 1.07 (3H, t, *J* = 7.1 Hz), 1.79 (3H, s), 2.27 (3H, s), 2.79 (1H, m), 3.15-3.40 (5H, m), 3.69 (3H, s), 6.73 (2H,

dt,  $J = 3.4, 9.0$  Hz), 6.83 (1H, brs), 7.10 (2H, d,  $J = 8.0$  Hz), 7.18-7.20 (2H, m), 7.26 (2H, d,  $J = 8.0$  Hz);  $^{13}\text{C}$  NMR (100 MHz,  $\text{CDCl}_3$ )  $\delta$  12.4, 14.4, 21.1, 23.7, 41.9, 42.3 (t,  $J = 6.2$  Hz), 42.5 (t,  $J = 21.4$  Hz), 48.9, 55.6, 114.1, 119.2 (t,  $J = 256.8$  Hz), 122.1, 126.5, 129.6, 130.9, 137.3, 140.1, 156.6, 163.1 (t,  $J = 28.4$  Hz), 173.8;  $^{19}\text{F}$  NMR ( $\text{CDCl}_3$ , 376 MHz)  $\delta$  -94.6 (d,  $J = 269.8$  Hz), -96.3 (d,  $J = 270.1$  Hz); HRMS (EI, TOF) calcd for  $\text{C}_{24}\text{H}_{30}\text{F}_2\text{N}_2\text{O}_3^+$   $[\text{M}]^+$ : 432.2224, found: 432.2235.

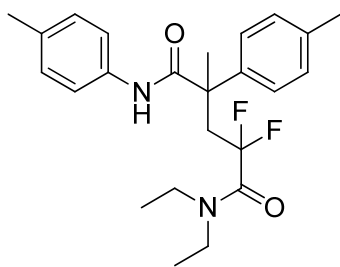

***N*<sup>1</sup>,*N*<sup>1</sup>-diethyl-2,2-difluoro-4-methyl-*N*<sup>5,4</sup>-di-*p*-tolylpentanediamide (3c).** The compound **3c** was obtained in 83% yield (69.2 mg) as colorless liquid after column chromatography (PE/EA=15:1).  $^1\text{H}$  NMR (400 MHz,  $\text{CDCl}_3$ )  $\delta$  1.01 (3H, t,  $J = 7.1$  Hz), 1.06 (3H, t,  $J = 7.0$  Hz), 1.78 (3H, s), 2.20 (3H, s), 2.26 (3H, s), 2.78 (1H, m), 3.15-3.41 (5H, m), 6.87 (1H, brs), 6.99 (2H, d,  $J = 8.2$  Hz), 7.10 (2H, d,  $J = 8.0$  Hz), 7.17 (2H, d,  $J = 8.2$  Hz), 7.25 (2H, d,  $J = 8.2$  Hz);  $^{13}\text{C}$  NMR (100 MHz,  $\text{CDCl}_3$ )  $\delta$  12.4, 14.4, 20.9, 21.0, 41.9, 42.3 (t,  $J = 6.2$  Hz), 42.5 (t,  $J = 21.5$  Hz), 49.0, 119.2 (t,  $J = 253.7$  Hz), 120.2, 126.5, 129.4, 129.6, 134.0, 135.3, 137.3, 140.1, 163.1 (t,  $J = 28.6$  Hz), 173.7;  $^{19}\text{F}$  NMR ( $\text{CDCl}_3$ , 376 MHz)  $\delta$  -94.6 (d,  $J = 270.5$  Hz), -96.2 (d,  $J = 270.6$  Hz); HRMS (EI, TOF) calcd for  $\text{C}_{24}\text{H}_{30}\text{F}_2\text{N}_2\text{O}_2^+$   $[\text{M}]^+$ : 416.2275, found: 416.2279.

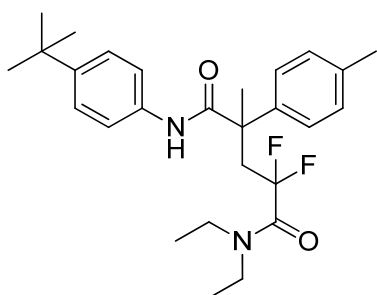

***N*<sup>1</sup>-(4-(*tert*-butyl)phenyl)-*N*<sup>5</sup>,*N*<sup>5</sup>-diethyl-4,4-difluoro-2-methyl-2-(*p*-tolyl)pentanediamide (3d).**

The compound **3d** was obtained in 81% yield (74.4 mg) as colorless liquid after column chromatography (PE/EA=15:1). <sup>1</sup>H NMR (400 MHz, CDCl<sub>3</sub>) δ 1.01 (3H, t, *J* = 7.1 Hz), 1.07 (3H, t, *J* = 7.0 Hz), 1.20 (9H, s), 1.79 (3H, s), 2.27 (3H, s), 2.72-2.86 (1H, m), 3.15-3.26 (5H, m), 6.80 (1H, brs), 7.09 (2H, d, *J* = 8.0 Hz), 7.22-7.26 (6H, m); <sup>13</sup>C NMR (100 MHz, CDCl<sub>3</sub>) δ 12.4, 14.4, 21.0, 23.7, 31.4, 34.4, 41.9, 42.3 (t, *J* = 5.8 Hz), 42.4 (t, *J* = 21.5 Hz), 48.9, 119.2 (t, *J* = 253.7 Hz), 119.8, 125.8, 126.5, 129.6, 135.3, 137.3, 140.1, 163.1 (t, *J* = 28.7 Hz), 173.7; <sup>19</sup>F NMR (CDCl<sub>3</sub>, 376 MHz) δ -94.6 (d, *J* = 270.3 Hz), -96.3 (d, *J* = 270.6 Hz); HRMS (EI, TOF) calcd for C<sub>27</sub>H<sub>36</sub>F<sub>2</sub>N<sub>2</sub>O<sub>2</sub><sup>+</sup> [M]<sup>+</sup>: 458.2745, found: 458.2747.

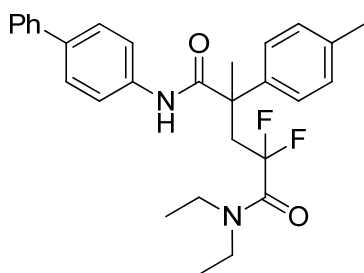

***N*<sup>1</sup>-([1,1'-biphenyl]-4-yl)-*N*<sup>5</sup>,*N*<sup>5</sup>-diethyl-4,4-difluoro-2-methyl-2-(*p*-tolyl)pentanediamide (3e).**

The compound **3e** was obtained in 77% yield (73.7 mg) as colorless liquid after column chromatography (PE/EA=15:1). <sup>1</sup>H NMR (400 MHz, CDCl<sub>3</sub>) δ 1.02 (3H, t, *J* = 7.1 Hz), 1.08 (3H, t, *J* = 7.0 Hz), 1.81 (3H, s), 2.28 (3H, s), 2.75-2.89 (1H, m), 3.18-3.25 (5H, m), 6.98 (1H, brs), 7.12 (2H, d, *J* = 8.0 Hz), 7.21-7.28 (3H, m), 7.31-7.39 (3H, m), 7.742-7.48 (4H, m); <sup>13</sup>C NMR (100 MHz, CDCl<sub>3</sub>) δ 12.4, 14.4, 21.0, 23.7, 41.9, 42.3 (t, *J* = 5.8 Hz), 42.4 (t, *J* = 21.4 Hz), 49.1, 119.2 (t, *J* = 253.8 Hz), 120.3, 126.4, 126.9, 127.2, 127.6, 128.8, 129.7, 137.2, 137.4, 139.7, 140.6, 163.0 (t, *J* = 28.5 Hz), 173.9; <sup>19</sup>F NMR (CDCl<sub>3</sub>, 376 MHz) δ -94.5 (d, *J* = 271.0 Hz), -96.2 (d, *J* = 270.9 Hz); HRMS (EI, TOF) calcd for C<sub>29</sub>H<sub>32</sub>F<sub>2</sub>N<sub>2</sub>O<sub>2</sub><sup>+</sup> [M]<sup>+</sup>: 478.2432, found: 478.2433.



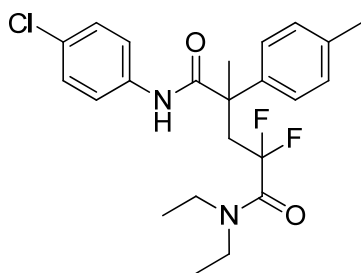

***N*<sup>1</sup>-(4-chlorophenyl)-*N*<sup>5</sup>,*N*<sup>5</sup>-diethyl-4,4-difluoro-2-methyl-2-(*p*-tolyl)pentanediamide (3f).** The compound **3f** was obtained in 84% yield (73.4 mg) as colorless liquid after column chromatography (PE/EA=15:1). <sup>1</sup>H NMR (400 MHz, CDCl<sub>3</sub>) δ 1.01 (3H, t, *J* = 7.1 Hz), 1.07 (3H, t, *J* = 7.0 Hz), 1.78 (3H, s), 2.27 (3H, s), 2.72-2.85 (1H, m), 3.01-3.39 (5H, m), 6.96 (1H, brs), 7.10-7.16 (4H, m), 7.23-7.26 (4H, m); <sup>13</sup>C NMR (100 MHz, CDCl<sub>3</sub>) δ 12.4, 14.3, 21.1, 23.8, 42.3 (t, *J* = 6.2 Hz), 42.4 (t, *J* = 21.6 Hz), 49.1, 119.2 (t, *J* = 254.8 Hz), 121.3, 126.5, 128.9, 129.4, 129.8, 136.5, 137.5, 139.8, 163.0 (t, *J* = 28.6 Hz), 173.9; <sup>19</sup>F NMR (CDCl<sub>3</sub>, 376 MHz) δ -94.4 (d, *J* = 272.1 Hz), -96.2 (d, *J* = 272.7 Hz); HRMS (EI, TOF) calcd for C<sub>23</sub>H<sub>27</sub>ClF<sub>2</sub>N<sub>2</sub>O<sub>2</sub><sup>+</sup> [M]<sup>+</sup>: 436.1729, found: 436.1745

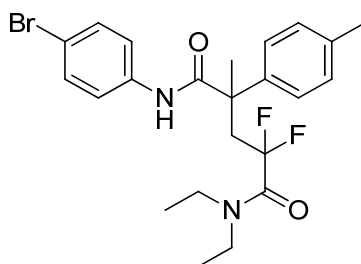

***N*<sup>1</sup>-(4-bromophenyl)-*N*<sup>5</sup>,*N*<sup>5</sup>-diethyl-4,4-difluoro-2-methyl-2-(*p*-tolyl)pentanediamide (3g).** The compound **3g** was obtained in 85% yield (81.8 mg) as colorless liquid after column chromatography (PE/EA=15:1). <sup>1</sup>H NMR (400 MHz, CDCl<sub>3</sub>) δ 1.01 (3H, t, *J* = 7.1 Hz), 1.06 (3H, t, *J* = 7.0 Hz), 1.78 (3H, s), 2.27 (3H, s), 2.71-2.85 (1H, m), 3.16-3.35 (5H, m), 6.96 (1H, brs), 7.10 (2H, d, *J* = 8.0 Hz), 7.18-7.30 (6H, m); <sup>13</sup>C NMR (100 MHz, CDCl<sub>3</sub>) δ 12.4, 14.4, 21.0, 23.7, 41.9, 42.3 (t, *J* = 6.1 Hz), 42.4 (t, *J* = 21.7 Hz), 49.1, 116.9, 119.1 (t, *J* = 254.2 Hz), 121.7, 126.4,

129.4, 131.9, 137.0, 137.5, 139.8, 162.9 (t,  $J = 28.5$  Hz), 173.9;  $^{19}\text{F}$  NMR ( $\text{CDCl}_3$ , 376 MHz)  $\delta$  -94.4 (d,  $J = 272.2$  Hz), -96.2 (d,  $J = 272.1$  Hz); HRMS (EI, TOF) calcd for  $\text{C}_{23}\text{H}_{27}\text{BrF}_2\text{N}_2\text{O}_2^+$   $[\text{M}]^+$ : 480.1224, found: 480.1226.

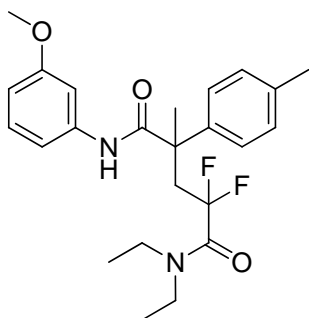

**$N^1,N^1$ -diethyl-2,2-difluoro- $N^5$ -(3-methoxyphenyl)-4-methyl-4-(*p*-tolyl)pentanediamide (3h).**

The compound **3h** was obtained in 79% yield (68.4 mg) as colorless liquid after column chromatography (PE/EA=15:1).  $^1\text{H}$  NMR (400 MHz,  $\text{CDCl}_3$ )  $\delta$  1.01 (3H, t,  $J = 7.1$  Hz), 1.07 (3H, t,  $J = 7.0$  Hz), 1.79 (3H, s), 2.27 (3H, s), 2.72-2.85 (1H, m), 3.15-3.43 (5H, m), 3.69 (3H, s), 6.71-6.75 (2H, m), 6.83 (1H, brs), 7.10 (2H, d,  $J = 8.0$  Hz), 7.18-7.20 (2H, m), 7.26 (2H, d,  $J = 8.0$  Hz);  $^{13}\text{C}$  NMR (100 MHz,  $\text{CDCl}_3$ )  $\delta$  12.4, 14.4, 21.1, 23.7, 41.9, 42.3 (t,  $J = 5.7$  Hz), 42.5 (t,  $J = 21.4$  Hz), 48.9, 55.6, 114.1, 119.2 (t,  $J = 253.7$  Hz), 122.1, 126.5, 129.6, 130.9, 137.3, 140.1, 156.6, 163.1 (t,  $J = 28.4$  Hz);  $^{19}\text{F}$  NMR ( $\text{CDCl}_3$ , 376 MHz)  $\delta$  -94.7 (d,  $J = 269.4$  Hz), -96.3 (d,  $J = 269.5$  Hz); HRMS (EI, TOF) calcd for  $\text{C}_{24}\text{H}_{30}\text{F}_2\text{N}_2\text{O}_3^+$   $[\text{M}]^+$ : 432.2224, found: 432.2233.

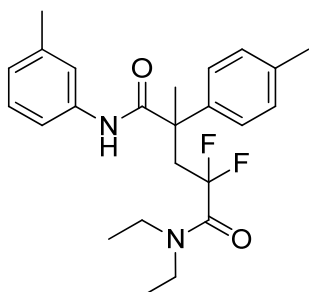

**$N^1,N^1$ -diethyl-2,2-difluoro-4-methyl- $N^5$ -(*m*-tolyl)-4-(*p*-tolyl)pentanediamide (3i).** The compound **3i** was obtained in 82% yield (68.4 mg) as colorless liquid after column

chromatography (PE/EA=15:1).  $^1\text{H}$  NMR (400 MHz,  $\text{CDCl}_3$ )  $\delta$  1.01 (3H, t,  $J = 7.1$  Hz), 1.07 (3H, t,  $J = 7.0$  Hz), 1.78 (3H, s), 2.22 (3H, s), 2.27 (3H, s), 2.73-2.87 (1H, m), 3.16-3.40 (5H, m), 6.80-6.82 (1H, m), 6.87 (1H, brs), 7.06-7.08 (2H, m), 7.10 (2H, d,  $J = 8.1$  Hz), 7.17 (1H, s), 7.25 (2H, d,  $J = 8.2$  Hz);  $^{13}\text{C}$  NMR (100 MHz,  $\text{CDCl}_3$ )  $\delta$  12.4, 14.4, 21.1, 23.7, 41.9, 42.2 (t,  $J = 5.9$  Hz), 42.4 (t,  $J = 21.4$  Hz), 49.1, 117.1, 119.2 (t,  $J = 253.9$  Hz), 120.7, 125.2, 126.5, 128.8, 129.7, 137.4, 137.8, 138.9, 139.9, 163.0 (t,  $J = 28.7$  Hz), 173.8;  $^{19}\text{F}$  NMR ( $\text{CDCl}_3$ , 376 MHz)  $\delta$  -94.7 (d,  $J = 270.9$  Hz), -96.2 (d,  $J = 271.3$  Hz); HRMS (EI, TOF) calcd for  $\text{C}_{24}\text{H}_{30}\text{F}_2\text{N}_2\text{O}_2^+$   $[\text{M}]^+$ : 416.2275, found: 416.2281.

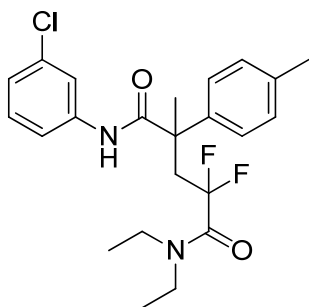

**$N^1$ -(3-chlorophenyl)- $N^5,N^5$ -diethyl-4,4-difluoro-2-methyl-2-(*p*-tolyl)pentanediamide (3j).** The compound **3j** was obtained in 85% yield (74.3 mg) as colorless liquid after column chromatography (PE/EA=15:1).  $^1\text{H}$  NMR (400 MHz,  $\text{CDCl}_3$ )  $\delta$  1.01 (3H, t,  $J = 7.1$  Hz), 1.07 (3H, t,  $J = 7.0$  Hz), 1.78 (3H, s), 2.28 (3H, s), 2.72-2.85 (1H, m), 3.16-3.41 (5H, m), 6.95-6.98 (2H, m), 7.10-7.14 (4H, m), 7.24 (2H, d,  $J = 8.3$  Hz), 7.45 (t,  $J = 1.9$  Hz);  $^{13}\text{C}$  NMR (100 MHz,  $\text{CDCl}_3$ )  $\delta$  12.4, 14.4, 21.0, 23.8, 41.9, 42.3 (t,  $J = 6.0$  Hz), 42.4 (t,  $J = 21.5$  Hz), 49.2, 117.9, 119.2 (t,  $J = 254.0$  Hz), 120.1, 124.4, 126.5, 129.8, 129.9, 134.7, 137.6, 139.0, 139.7, 163.0 (t,  $J = 28.5$  Hz), 173.9;  $^{19}\text{F}$  NMR ( $\text{CDCl}_3$ , 376 MHz)  $\delta$  -94.4 (d,  $J = 272.2$  Hz), -96.2 (d,  $J = 272.2$  Hz); HRMS (EI, TOF) calcd for  $\text{C}_{23}\text{H}_{27}\text{ClF}_2\text{N}_2\text{O}_2^+$   $[\text{M}]^+$ : 436.1729, found: 436.1734.

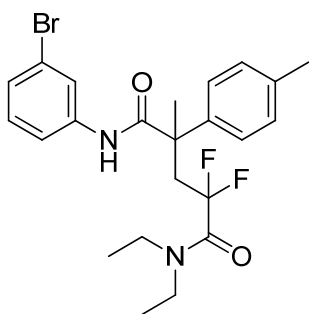

***N*<sup>1</sup>-(3-bromophenyl)-*N*<sup>5</sup>,*N*<sup>5</sup>-diethyl-4,4-difluoro-2-methyl-2-(*p*-tolyl)pentanediamide (3k).**

The compound **3k** was obtained in 88% yield (84.7 mg) as colorless liquid after column chromatography (PE/EA=15:1). <sup>1</sup>H NMR (400 MHz, CDCl<sub>3</sub>) δ 1.01 (3H, t, *J* = 7.1 Hz), 1.07 (3H, t, *J* = 7.0 Hz), 1.78 (3H, s), 2.27 (3H, s), 2.78 (1H, td, *J* = 13.4, 24.5 Hz), 3.16-3.41 (5H, m), 6.94-6.97 (1H, d, *J* = 9.6 Hz), 7.04 (1H, t, *J* = 8.0 Hz), 7.10-7.12 (3H, m), 7.18-7.22 (3H, m), 7.58 (1H, t, *J* = 1.9 Hz); <sup>13</sup>C NMR (100 MHz, CDCl<sub>3</sub>) δ 12.4, 14.4, 21.0, 23.7, 41.9, 42.2 (t, *J* = 6.1 Hz), 42.3 (t, *J* = 21.6 Hz), 49.1, 118.5, 119.1 (t, *J* = 254.1 Hz), 122.6, 122.9, 126.4, 127.3, 129.8, 130.2, 137.5, 139.2, 139.7, 162.9 (t, *J* = 28.6 Hz), 173.9; <sup>19</sup>F NMR (CDCl<sub>3</sub>, 376 MHz) δ -94.4 (d, *J* = 272.5 Hz), -96.1 (d, *J* = 272.5 Hz); HRMS (EI, TOF) calcd for C<sub>23</sub>H<sub>27</sub>BrF<sub>2</sub>N<sub>2</sub>O<sub>2</sub><sup>+</sup> [M]<sup>+</sup>: 480.1224, found: 480.1226.

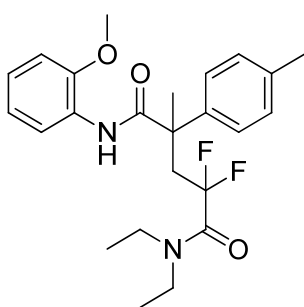

***N*<sup>1</sup>,*N*<sup>1</sup>-diethyl-2,2-difluoro-*N*<sup>5</sup>-(2-methoxyphenyl)-4-methyl-4-(*p*-tolyl)pentanediamide (3l).**

The compound **3l** was obtained in 80% yield (69.3 mg) as colorless liquid after column chromatography (PE/EA=15:1). <sup>1</sup>H NMR (400 MHz, CDCl<sub>3</sub>) δ 1.02 (3H, t, *J* = 7.1 Hz), 1.07 (3H, t, *J* = 7.0 Hz), 1.79 (3H, s), 2.27 (3H, s), 2.74-2.88 (1H, m), 3.16-3.41 (5H, m), 3.71 (3H, s), 6.55

(1H, ddd,  $J = 0.7, 2.4, 8.2$  Hz), 6.71 (1H, dd,  $J = 1.2, 8.0$  Hz), 6.90 (1H, brs), 7.05-7.13 (4H, m), 7.25 (2H, d,  $J = 8.2$  Hz);  $^{13}\text{C}$  NMR (100 MHz,  $\text{CDCl}_3$ )  $\delta$  12.4, 14.4, 41.9, 42.2 (t,  $J = 5.8$  Hz), 42.4 (t,  $J = 21.5$  Hz), 49.1, 55.4, 105.6, 110.3, 112.1, 119.1 (t,  $J = 253.9$  Hz), 126.5, 129.6, 129.7, 137.4, 139.2, 139.9, 160.2, 163.0 (t,  $J = 28.7$  Hz), 173.8;  $^{19}\text{F}$  NMR ( $\text{CDCl}_3$ , 376 MHz)  $\delta$  -94.6 (d,  $J = 271.0$  Hz), -96.2 (d,  $J = 271.2$  Hz); HRMS (EI, TOF) calcd for  $\text{C}_{24}\text{H}_{30}\text{F}_2\text{N}_2\text{O}_3^+$   $[\text{M}]^+$ : 432.2224, found: 432.2225.

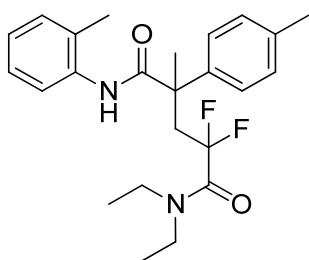

**$N^1,N^1$ -diethyl-2,2-difluoro-4-methyl- $N^5$ -(*o*-tolyl)-4-(*p*-tolyl)pentanediamide (3m).** The compound **3m** was obtained in 78% yield (65.1 mg) as colorless liquid after column chromatography (PE/EA=15:1).  $^1\text{H}$  NMR (400 MHz,  $\text{CDCl}_3$ )  $\delta$  1.00 (3H, t,  $J = 7.1$  Hz), 1.07 (3H, t,  $J = 7.0$  Hz), 1.80 (3H, s), 1.83 (3H, s), 2.27 (3H, s), 2.80-2.94 (1H, m), 3.16-3.23 (5H, m), 6.75 (1H, m), 6.93 (1H, dt,  $J = 1.0, 7.4$  Hz), 7.00 (1H, d,  $J = 7.0$  Hz), 7.07-7.14 (3H, m), 7.30 (2H, d,  $J = 8.3$  Hz);  $^{13}\text{C}$  NMR (100 MHz,  $\text{CDCl}_3$ )  $\delta$  12.4, 14.4, 17.2, 21.0, 23.5, 41.8, 42.1 (t,  $J = 21.7$  Hz), 42.2 (t,  $J = 6.2$  Hz), 49.2, 119.2 (t,  $J = 253.7$  Hz), 122.5, 125.0, 126.7, 126.8, 128.9, 129.7, 130.4, 135.8, 137.4, 139.9, 163.0 (t,  $J = 28.5$  Hz), 173.9;  $^{19}\text{F}$  NMR ( $\text{CDCl}_3$ , 376 MHz)  $\delta$  -94.9 (d,  $J = 269.4$  Hz), -96.9 (d,  $J = 269.6$  Hz); HRMS (EI, TOF) calcd for  $\text{C}_{24}\text{H}_{30}\text{F}_2\text{N}_2\text{O}_2^+$   $[\text{M}]^+$ : 416.2275, found: 416.2281.

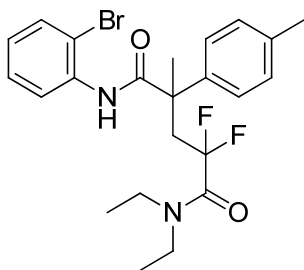

***N*<sup>1</sup>-(2-bromophenyl)-*N*<sup>5</sup>,*N*<sup>5'</sup>-diethyl-4,4-difluoro-2-methyl-2-(*p*-tolyl)pentanediamide (3n).**

The compound **3n** was obtained in 83% yield (79.8 mg) as colorless liquid after column chromatography (PE/EA=15:1). <sup>1</sup>H NMR (400 MHz, CDCl<sub>3</sub>) δ 1.02 (3H, t, *J* = 7.1 Hz), 1.06 (3H, t, *J* = 7.0 Hz), 1.85 (3H, s), 2.26 (3H, s), 2.80-2.93 (1H, m), 3.18-3.27 (5H, m), 6.84 (1H, dt, *J* = 1.5, 8.0 Hz), 7.12 (2H, d, *J* = 8.0 Hz), 7.18-7.23 (1H, m), 7.29 (2H, d, *J* = 8.0 Hz), 7.36 (1H, dt, *J* = 1.4, 8.0 Hz), 7.54 (1H, brs); <sup>13</sup>C NMR (100 MHz, CDCl<sub>3</sub>) δ 12.4, 14.4, 21.0, 23.3, 41.9, 42.1 (t, *J* = 21.3 Hz), 42.2 (t, *J* = 6.2 Hz), 49.4, 113.7, 119.2 (t, *J* = 253.9 Hz), 121.6, 125.1, 126.6, 128.3, 129.7, 132.2, 135.8, 137.5, 139.4, 162.9 (t, *J* = 28.5 Hz), 174.0; <sup>19</sup>F NMR (CDCl<sub>3</sub>, 376 MHz) δ -95.1 (d, *J* = 271.5 Hz), -95.9 (d, *J* = 271.8 Hz); HRMS (EI, TOF) calcd for C<sub>23</sub>H<sub>27</sub>BrF<sub>2</sub>N<sub>2</sub>O<sub>2</sub><sup>+</sup> [M]<sup>+</sup>: 480.1224, found: 480.1219.

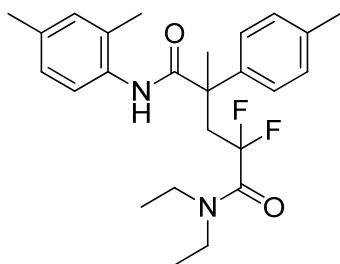

***N*<sup>1</sup>-(2,4-dimethylphenyl)-*N*<sup>5</sup>,*N*<sup>5'</sup>-diethyl-4,4-difluoro-2-methyl-2-(*p*-tolyl)pentanediamide (3o).**

The compound **3o** was obtained in 81% yield (69.8 mg) as colorless liquid after column chromatography (PE/EA=15:1). <sup>1</sup>H NMR (400 MHz, CDCl<sub>3</sub>) δ 1.01 (3H, t, *J* = 7.1 Hz), 1.06 (3H, t, *J* = 7.0 Hz), 1.79 (3H, s), 1.82 (3H, s), 2.17 (3H, s), 2.27 (3H, s), 2.78-2.92 (1H, m), 3.15-3.39 (5H, m), 6.68 (1H, brs), 6.83 (1H, s), 6.90 (1H, d, *J* = 8.2 Hz), 7.12 (2H, d, *J* = 8.0 Hz), 7.30 (2H,

d,  $J = 8.0$  Hz), 7.49 (1H, d,  $J = 8.1$  Hz);  $^{13}\text{C}$  NMR (100 MHz,  $\text{CDCl}_3$ )  $\delta$  12.4, 14.4, 17.2, 20.9, 21.0, 23.5, 41.9, 42.2 (t,  $J = 21.4$  Hz), 42.3 (t,  $J = 6.0$  Hz), 49.1, 119.2 (t,  $J = 253.8$  Hz), 122.9, 126.7, 127.3, 129.3, 129.6, 131.1, 133.1, 134.8, 137.4, 140.1, 163.1 (t,  $J = 28.4$  Hz), 174.0;  $^{19}\text{F}$  NMR ( $\text{CDCl}_3$ , 376 MHz)  $\delta$  -94.9 (d,  $J = 269.2$  Hz), -95.9 (d,  $J = 269.3$  Hz); HRMS (EI, TOF) calcd for  $\text{C}_{25}\text{H}_{33}\text{F}_2\text{N}_2\text{O}_2^+$   $[\text{M}]^+$ : 430.2432, found: 430.2442.

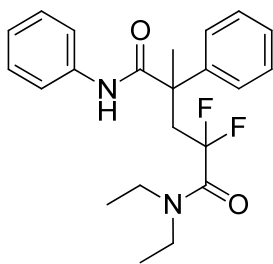

***N*<sup>1</sup>,*N*<sup>1</sup>-diethyl-2,2-difluoro-4-methyl-*N*<sup>5</sup>,4-diphenylpentanediamide (3p).** The compound **3** was obtained in 77% yield (59.8 mg) as white solid after column chromatography (PE/EA=15:1). Melting point: 96.0 - 97.1 °C;  $^1\text{H}$  NMR (400 MHz,  $\text{CDCl}_3$ )  $\delta$  1.02 (3H, t,  $J = 7.1$  Hz), 1.07 (3H, t,  $J = 7.0$  Hz), 1.83 (3H, s), 2.75-2.88 (1H, m), 3.16-3.26 (5H, m), 6.91 (1H, brs), 7.00 (1H, t,  $J = 7.4$  Hz), 7.18-7.25 (3H, m), 7.29-7.33 (4H, m), 7.37-7.40 (2H, m);  $^{13}\text{C}$  NMR (100 MHz,  $\text{CDCl}_3$ )  $\delta$  12.4, 14.4, 23.6, 41.9, 42.2 (t,  $J = 5.8$  Hz), 42.5 (t,  $J = 21.4$  Hz), 49.4, 119.1 (t,  $J = 253.7$  Hz), 120.1, 124.5, 126.6, 127.7, 129.9, 137.8, 143.0, 163.0 (t,  $J = 28.5$  Hz), 173.6;  $^{19}\text{F}$  NMR ( $\text{CDCl}_3$ , 376 MHz)  $\delta$  -94.5 (d,  $J = 270.9$  Hz), -96.2 (d,  $J = 271.0$  Hz); HRMS (EI, TOF) calcd for  $\text{C}_{22}\text{H}_{26}\text{F}_2\text{N}_2\text{O}_2^+$   $[\text{M}]^+$ : 388.1962, found: 388.1964.

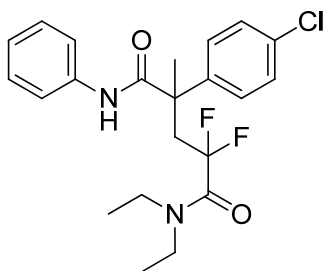

**2-(4-chlorophenyl)-*N*<sup>5</sup>,*N*<sup>5</sup>-diethyl-4,4-difluoro-2-methyl-*N*<sup>1</sup>-phenylpentanediamide (3q).** The

compound **3q** was obtained in 86% yield (72.8 mg) as colorless liquid after column chromatography (PE/EA=15:1). <sup>1</sup>H NMR (400 MHz, CDCl<sub>3</sub>) δ 1.02 (3H, t, *J* = 7.1 Hz), 1.08 (3H, t, *J* = 7.0 Hz), 1.80 (3H, s), 2.71-2.84 (1H, m), 3.17-3.40 (5H, m), 6.94 (1H, brs), 7.00-7.03 (1H, m), 7.18-7.23 (2H, m), 7.26-7.33 (6H, m); <sup>13</sup>C NMR (100 MHz, CDCl<sub>3</sub>) δ 12.4, 14.4, 23.6, 41.9, 42.3 (t, *J* = 6.1 Hz), 42.4 (t, *J* = 21.6 Hz), 48.9, 119.1 (t, *J* = 254.3 Hz), 120.2, 124.6, 128.1, 129.0, 129.1, 133.6, 137.7, 141.6, 162.9 (t, *J* = 28.5 Hz), 173.0; <sup>19</sup>F NMR (CDCl<sub>3</sub>, 376 MHz) δ -94.4 (d, *J* = 272.7 Hz), -96.4 (d, *J* = 272.5 Hz); HRMS (EI, TOF) calcd for C<sub>22</sub>H<sub>25</sub>ClF<sub>2</sub>N<sub>2</sub>O<sub>2</sub><sup>+</sup> [M]<sup>+</sup>: 422.1573, found: 422.1574

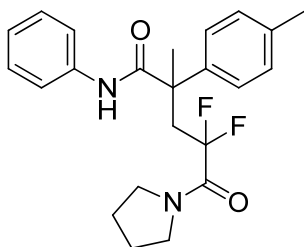

**4,4-difluoro-2-methyl-5-oxo-N-phenyl-5-(pyrrolidin-1-yl)-2-(p-tolyl)pentanamide (3r).**

The compound **3r** was obtained in 81% yield (64.8 mg) as colorless liquid after column chromatography (PE/EA=15:1). <sup>1</sup>H NMR (400 MHz, CDCl<sub>3</sub>) δ 1.61-1.69 (2H, m), 1.75-1.82 (5H, m), 2.27 (3H, s), 2.71-2.85 (1H, m), 3.04 (3H, s), 3.12-3.30 (3H, m), 3.47 (2H, t, *J* = 6.4 Hz), 6.90 (1H, brs), 6.97-7.02 (1H, m), 7.11 (2H, d, *J* = 8.04 Hz), 7.17-7.21 (2H, m), 7.24-7.30 (4H, m); <sup>13</sup>C NMR (100 MHz, CDCl<sub>3</sub>) δ 21.1, 23.3, 23.6, 26.6, 42.2 (t, *J* = 22.1 Hz), 46.8 (t, *J* = 6.2 Hz), 47.6, 48.9, 119.6 (t, *J* = 251.8 Hz), 120.0, 124.5, 126.7, 128.9, 129.7, 137.5, 137.9, 139.5, 162.2 (t, *J* = 29.3 Hz), 173.9; <sup>19</sup>F NMR (CDCl<sub>3</sub>, 376 MHz) δ -96.8, -96.9; HRMS (EI, TOF) calcd for C<sub>23</sub>H<sub>26</sub>F<sub>2</sub>N<sub>2</sub>O<sub>2</sub><sup>+</sup> [M]<sup>+</sup>: 400.1962, found: 400.1967.



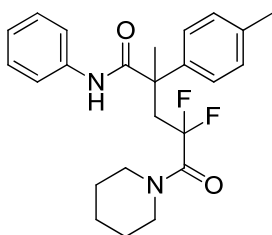

**4,4-difluoro-2-methyl-5-oxo-N-phenyl-5-(piperidin-1-yl)-2-(p-tolyl)pentanamide (3s).**

The compound **3s** was obtained in 87% yield (72.0 mg) as colorless liquid after column chromatography (PE/EA=15:1).  $^1\text{H}$  NMR (400 MHz,  $\text{CDCl}_3$ )  $\delta$  1.44-1.55 (6H, m), 1.79 (3H, s), 2.27 (3H, s), 2.76 (1H, td,  $J = 14.5, 24.1$  Hz), 3.17-3.30 (2H, m), 3.30-3.47 (3H, m), 6.90 (1H, brs), 6.99 (1H, t,  $J = 7.3$  Hz), 7.11 (2H, d,  $J = 8.2$  Hz), 7.18 (2H, dd,  $J = 7.5, 9.7$  Hz), 7.24-7.29 (4H, m);  $^{13}\text{C}$  NMR (100 MHz,  $\text{CDCl}_3$ )  $\delta$  21.1, 23.5, 24.5, 25.6, 26.5, 42.5 (t,  $J = 21.6$  Hz), 44.6, 47.1 (t,  $J = 6.3$  Hz), 49.1, 119.1 (t,  $J = 253.3$  Hz), 120.1, 124.5, 126.6, 129.0, 129.7, 137.5, 137.9, 139.8, 161.9 (t,  $J = 28.3$  Hz), 173.9;  $^{19}\text{F}$  NMR ( $\text{CDCl}_3$ , 376 MHz)  $\delta$  -93.9 (d,  $J = 270.2$  Hz), -95.0 (d,  $J = 270.5$  Hz); HRMS (EI, TOF) calcd for  $\text{C}_{24}\text{H}_{28}\text{F}_2\text{N}_2\text{O}_2^+$   $[\text{M}]^+$ : 414.2119, found: 414.2115.

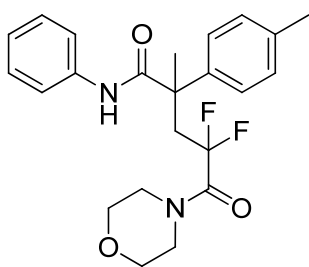

**4,4-difluoro-2-methyl-5-morpholino-5-oxo-N-phenyl-2-(p-tolyl)pentanamide (3t).** The compound **3t** was obtained in 80% yield (66.6 mg) as colorless liquid after column chromatography (PE/EA=7:1).  $^1\text{H}$  NMR (400 MHz,  $\text{CDCl}_3$ )  $\delta$  1.80 (3H, m), 2.29 (3H, m), 2.74 (1H, td,  $J = 15.2, 23.3$  Hz), 3.16-3.38 (2H, m), 3.45-3.60 (7H, m), 6.86 (1H, brs), 7.01 (t,  $J = 7.3$  Hz), 7.12 (d,  $J = 8.0$  Hz), 7.19-7.23 (2H, m), 7.26-7.30 (4H, m);  $^{13}\text{C}$  NMR (100

MHz, CDCl<sub>3</sub>)  $\delta$  21.1, 23.3, 42.6 (t,  $J$  = 21.2 Hz), 43.5, 46.7 (t,  $J$  = 6.4 Hz), 49.0, 66.7, 118.9 (t,  $J$  = 253.0 Hz), 120.1, 124.5, 126.6, 129.0, 129.7, 137.6, 137.8, 139.6, 162.2 (t,  $J$  = 28.7 Hz), 173.8; <sup>19</sup>F NMR (CDCl<sub>3</sub>, 376 MHz)  $\delta$  -93.6 (d,  $J$  = 272.0 Hz), -94.6 (d,  $J$  = 272.1 Hz); HRMS (EI, TOF) calcd for C<sub>23</sub>H<sub>26</sub>F<sub>2</sub>N<sub>2</sub>O<sub>3</sub><sup>+</sup> [M]<sup>+</sup>: 416.1911, found: 416.1919.

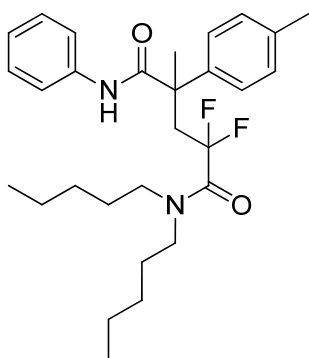

**2,2-difluoro-4-methyl-*N*<sup>1</sup>,*N*<sup>1</sup>-dipentyl-*N*<sup>5</sup>-phenyl-4-(*p*-tolyl)pentanediamide (3u).** The compound **3u** was obtained in 68% yield (66.2 mg) as colorless liquid after column chromatography (PE/EA=20:1). <sup>1</sup>H NMR (400 MHz, CDCl<sub>3</sub>)  $\delta$  0.77-0.82 (6H, m), 1.11-1.25 (8H, m), 1.39-1.50 (4H, m), 1.79 (3H, s), 2.27 (3H, s), 2.70-2.83 (1H, m), 3.10-3.29 (5H, m), 6.94 (1H, brs), 6.99 (1H, t,  $J$  = 7.4 Hz), 7.10 (2H, d,  $J$  = 8.1 Hz), 7.19 (2H, t,  $J$  = 7.6 Hz), 7.25-7.31 (4H, m); <sup>13</sup>C NMR (100 MHz, CDCl<sub>3</sub>)  $\delta$  14.0, 14.1, 21.0, 22.4, 22.5, 23.6, 26.7, 28.8, 28.9, 29.2, 42.6 (t,  $J$  = 21.6 Hz), 47.7, 48.1 (t,  $J$  = 5.6 Hz), 49.1, 119.2 (t,  $J$  = 253.5 Hz), 120.1, 124.4, 126.5, 128.9, 129.7, 137.4, 137.9, 140.1, 163.3 (t,  $J$  = 28.5 Hz), 173.8; <sup>19</sup>F NMR (CDCl<sub>3</sub>, 376 MHz)  $\delta$  -94.7 (d,  $J$  = 268.9 Hz), -96.2 (d,  $J$  = 270.0 Hz); HRMS (EI, TOF) calcd for C<sub>29</sub>H<sub>40</sub>F<sub>2</sub>N<sub>2</sub>O<sub>2</sub><sup>+</sup> [M]<sup>+</sup>: 486.3058, found: 486.3054.

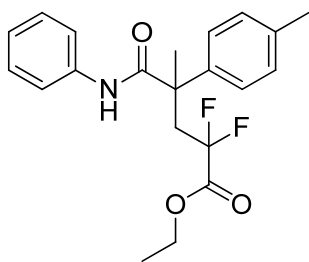

**Ethyl 2,2-difluoro-4-methyl-5-oxo-5-(phenylamino)-4-(*p*-tolyl)pentanoate (3v).** The compound was obtained in 25% (18.8 mg) yield as colorless liquid after column chromatography (PE/EA=10:1).  $^1\text{H}$  NMR (400 MHz,  $\text{CDCl}_3$ )  $\delta$  1.14 (3H, t,  $J = 7.2$  Hz), 1.79 (3H, s), 2.29 (2H, s), 2.76 (1H, td,  $J = 15.4, 20.7$  Hz), 3.07 (1H, q,  $J = 15.5$  Hz), 3.85 (2H, m), 6.69 (1H, brs), 6.98-7.047.02 (1H, m), 7.13 (2H, d,  $J = 8.1$  Hz), 7.17-7.26 (6H, m);  $^{13}\text{C}$  NMR (125.8 MHz,  $\text{CDCl}_3$ )  $\delta$  12.8, 20.1, 22.2, 41.7 (t,  $J = 22.7$  Hz), 48.0 (d,  $J = 3.7$  Hz), 61.8, 115.06 (t,  $J = 250.2$  Hz), 118.9, 123.6, 126.3, 128.0, 128.8, 136.7, 136.96, 137.0, 162.9 (t,  $J = 33.6$  Hz), 173.0;  $^{19}\text{F}$  NMR ( $\text{CDCl}_3$ , 376 MHz)  $\delta$  -97.1 (d,  $J = 262.4$  Hz), -100.7 (d,  $J = 261.9$  Hz); HRMS (ESI, TOF) calcd for  $\text{C}_{21}\text{H}_{23}\text{F}_2\text{NNaO}_3^+$  [ $\text{M} + \text{Na}^+$ ]: 398.1538, found: 398.1543.

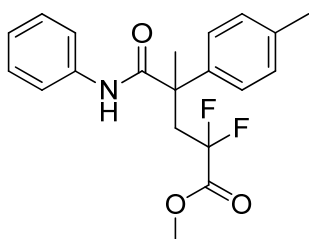

**Methyl 2,2-difluoro-4-methyl-5-oxo-5-(phenylamino)-4-(*p*-tolyl)pentanoate (4).** The compound **4** was obtained in 91% yield as colorless liquid after column chromatography (PE/EA=10:1).  $^1\text{H}$  NMR (400 MHz,  $\text{CDCl}_3$ )  $\delta$  1.78 (3H, s), 2.28 (3H, s), 2.75 (1H, td,  $J = 14.7, 21.6$  Hz), 3.07 (1H, q,  $J = 15.4$  Hz), 3.43 (3H, s), 6.68 (1H, brs), 6.98-7.02 (1H, m), 7.12-7.16 (2H, m), 7.17-7.25 (6H, m);  $^{13}\text{C}$  NMR (100 MHz,  $\text{CDCl}_3$ )  $\delta$  21.1, 23.0, 42.8 (dd,

$J = 22.2, 23.7$  Hz), 48.9 (d,  $J = 4.2$  Hz), 53.2, 116.08 (dd,  $J = 247.8, 250.7$  Hz), 119.9, 124.6, 127.3, 129.1, 129.8, 137.6, 137.7, 138.1, 164.3 (t,  $J = 32.2$  Hz), 173.9;  $^{19}\text{F}$  NMR ( $\text{CDCl}_3$ , 376 MHz)  $\delta$  -96.6 (d,  $J = 261.8$  Hz), -100.5 (d,  $J = 261.8$  Hz); HRMS (EI, TOF) calcd for  $\text{C}_{20}\text{H}_{21}\text{F}_2\text{NO}_3^+$   $[\text{M}]^+$ : 361.1489, found: 361.1487.

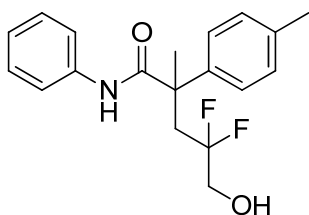

**4,4-difluoro-5-hydroxy-2-methyl-N-phenyl-2-(*p*-tolyl)pentanamide (5).** The compound **5** was obtained in 85% yield as colorless liquid after column chromatography (PE/EA=3:1).  $^1\text{H}$  NMR (400 MHz,  $\text{CDCl}_3$ )  $\delta$  1.79 (3H, s), 2.27 (3H, s), 2.37 (1H, td,  $J = 14.0, 19.2$  Hz), 2.88-3.01 (1H, m), 3.09 (1H, brs), 3.41-3.56 (2H, m), 6.95 (1H, brs), 7.00-7.04 (1H, m), 7.12 (2H, d,  $J = 8.1$  Hz), 7.17-7.29 (6H, m);  $^{13}\text{C}$  NMR (100 MHz,  $\text{CDCl}_3$ )  $\delta$  21.1, 23.4, 41.8 (t,  $J = 23.2$  Hz), 49.1, 64.5 (t,  $J = 31.1$  Hz), 120.4, 123.2 (t,  $J = 242.9$  Hz), 124.9, 126.3, 129.1, 129.9, 137.5, 137.7, 139.9, 174.9;  $^{19}\text{F}$  NMR ( $\text{CDCl}_3$ , 376 MHz)  $\delta$  -99.2 (d,  $J = 256.0$  Hz), -101.1 (d,  $J = 255.6$  Hz); HRMS (EI, TOF) calcd for  $\text{C}_{19}\text{H}_{21}\text{F}_2\text{NO}_2^+$   $[\text{M}]^+$ : 333.1540, found: 333.1541.

## 6. $^1\text{H}$ NMR, $^{13}\text{C}$ NMR and $^{19}\text{F}$ NMR Spectra of products

### $^1\text{H}$ NMR of $N^1, N^1$ -diethyl-2,2-difluoro-4-methyl- $N^5$ -phenyl-4-(*p*-tolyl) pentanediamide (3a).

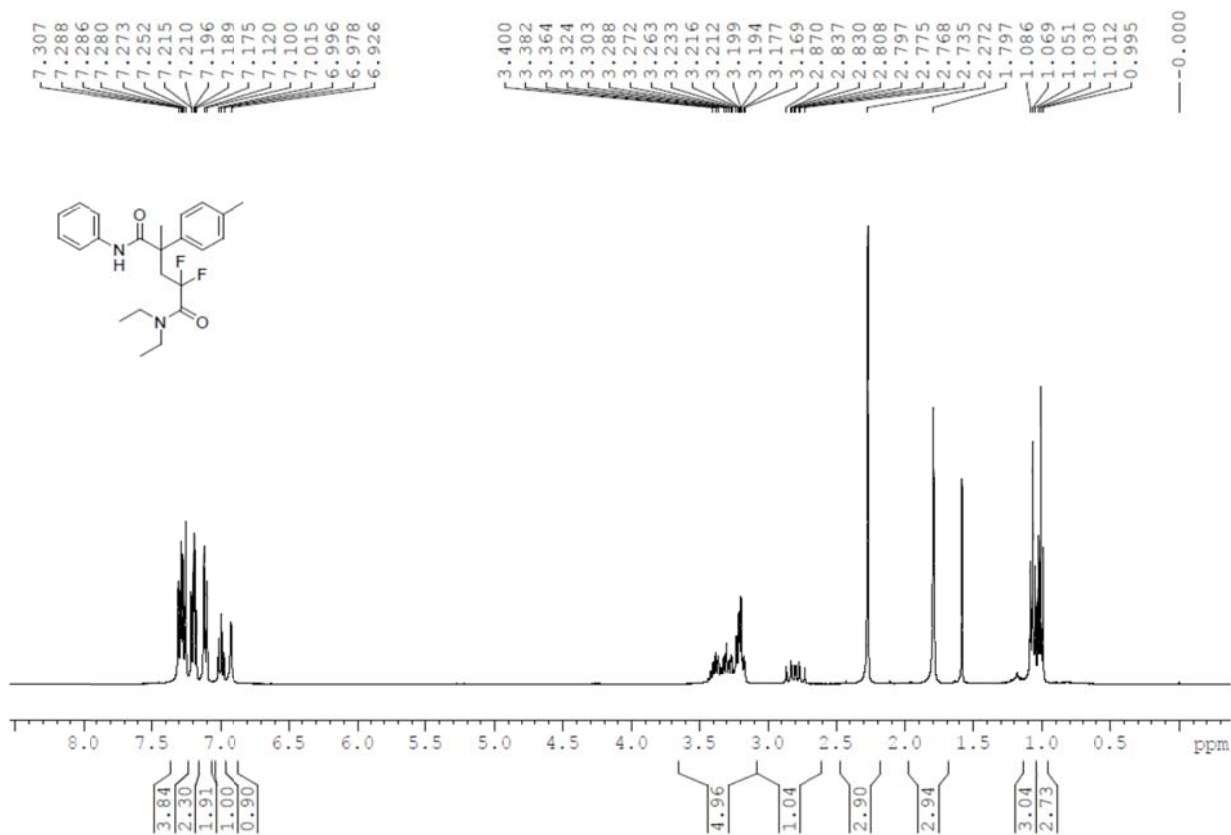

### $^{13}\text{C}$ NMR of $N^1, N^1$ -diethyl-2,2-difluoro-4-methyl- $N^5$ -phenyl-4-(*p*-tolyl) pentanediamide (3a).

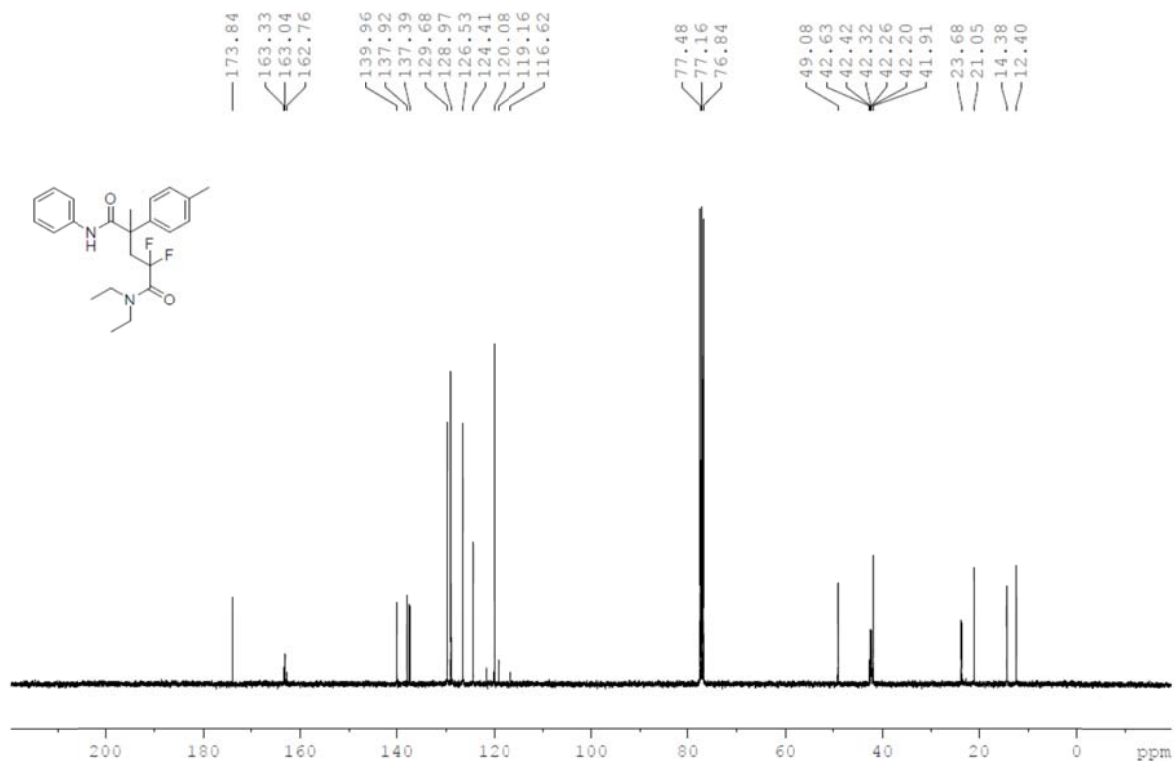

$^{19}\text{F}$  NMR of  $N^1,N^1$ -diethyl-2,2-difluoro-4-methyl- $N^5$ -phenyl-4-(*p*-tolyl) pentanediamide (3a).

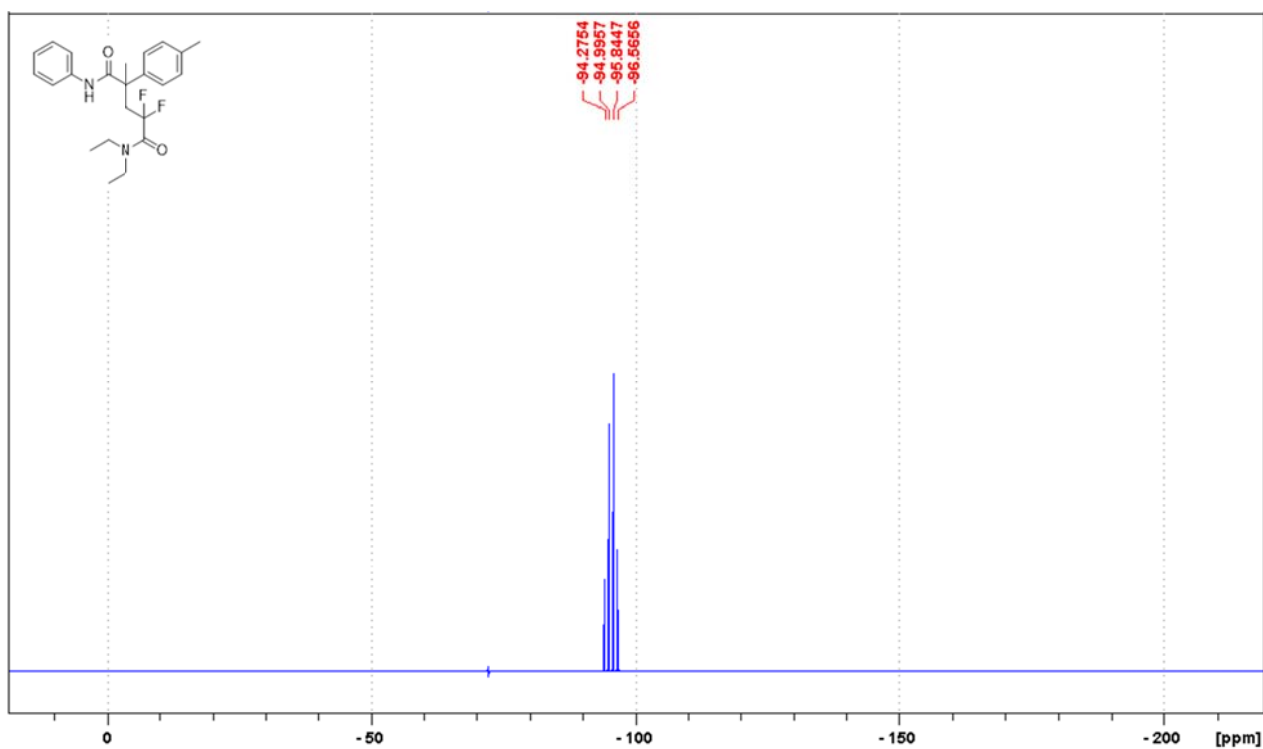

$^1\text{H}$  NMR of  $N^1,N^1$ -diethyl-2,2-difluoro- $N^5$ -(4-methoxyphenyl)-4-methyl-4-phenylpentanediamide (3b)

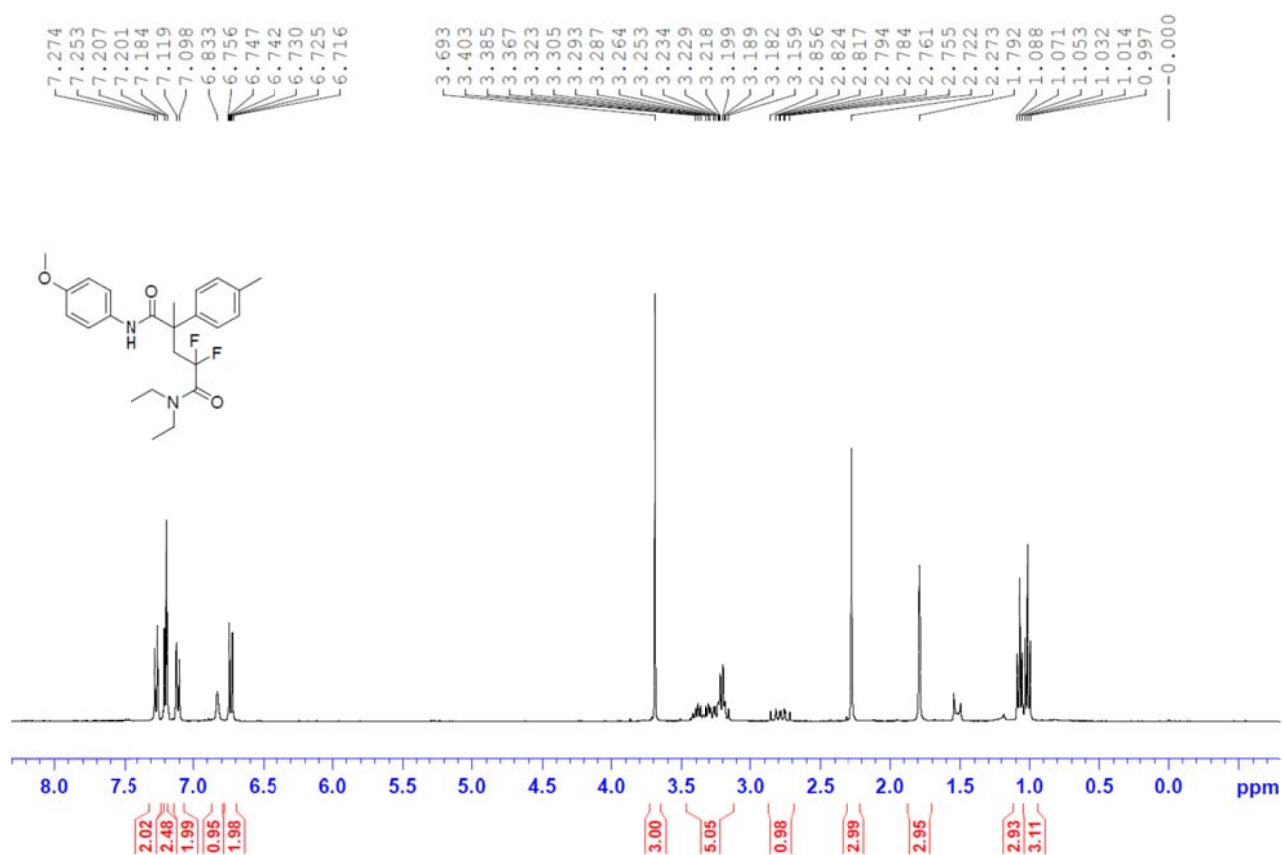

**$^{13}\text{C}$  NMR of  $N^1,N^1$ -diethyl-2,2-difluoro- $N^5$ -(4-methoxyphenyl)-4-methyl-4-phenylpentanediamide (3b)**

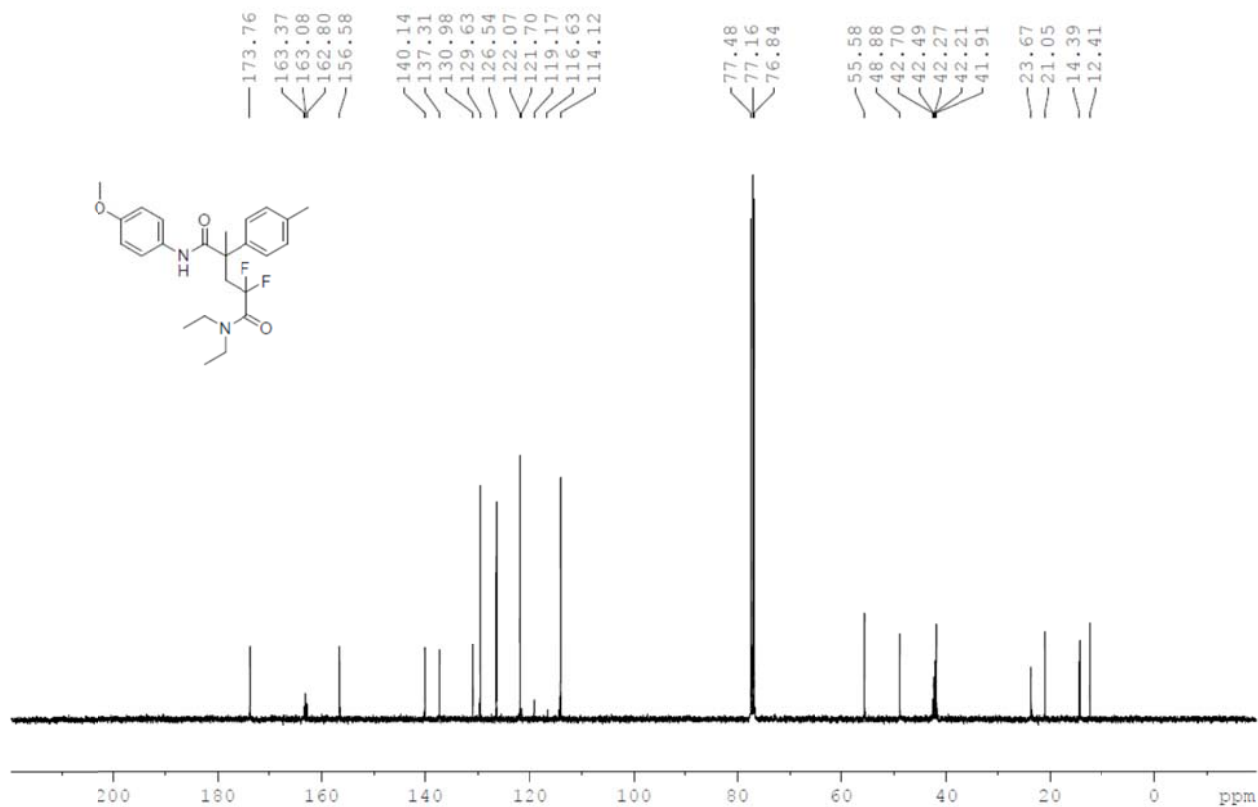

**$^{19}\text{F}$  NMR of  $N^1,N^1$ -diethyl-2,2-difluoro- $N^5$ -(4-methoxyphenyl)-4-methyl-4-phenylpentanediamide (3b)**

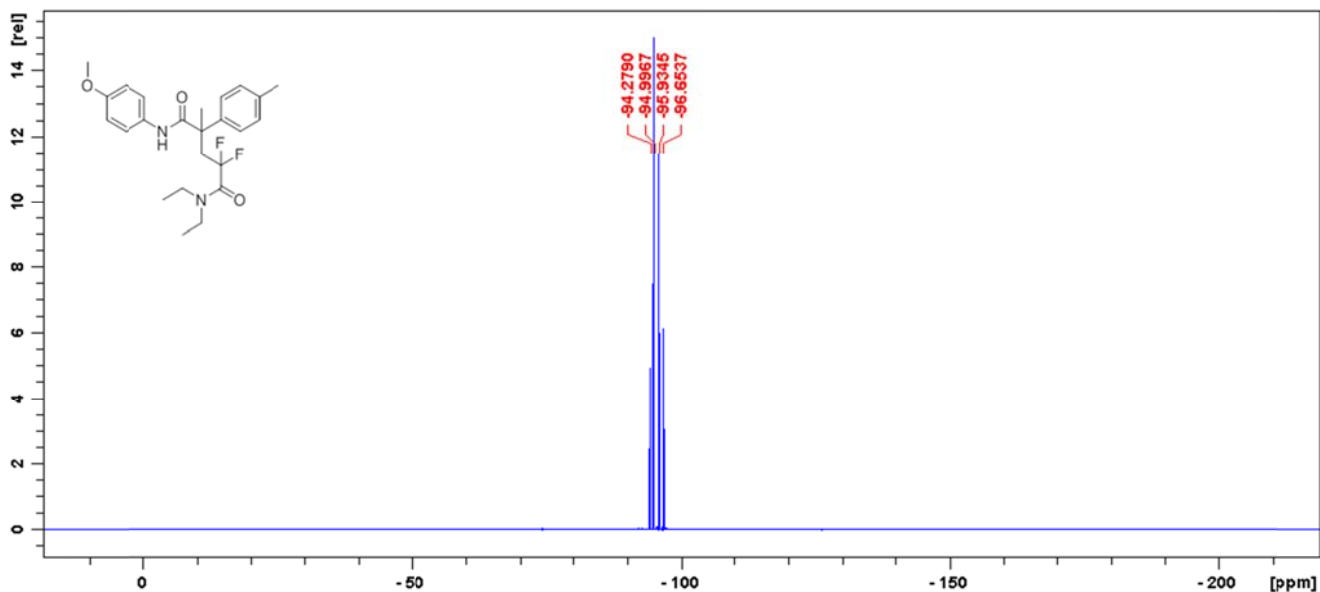

**$^1\text{H}$  NMR of  $N^1,N^1$ -diethyl-2,2-difluoro-4-methyl- $N^{5,4}$ -di-*p*-tolylpentanediamide (3c)**

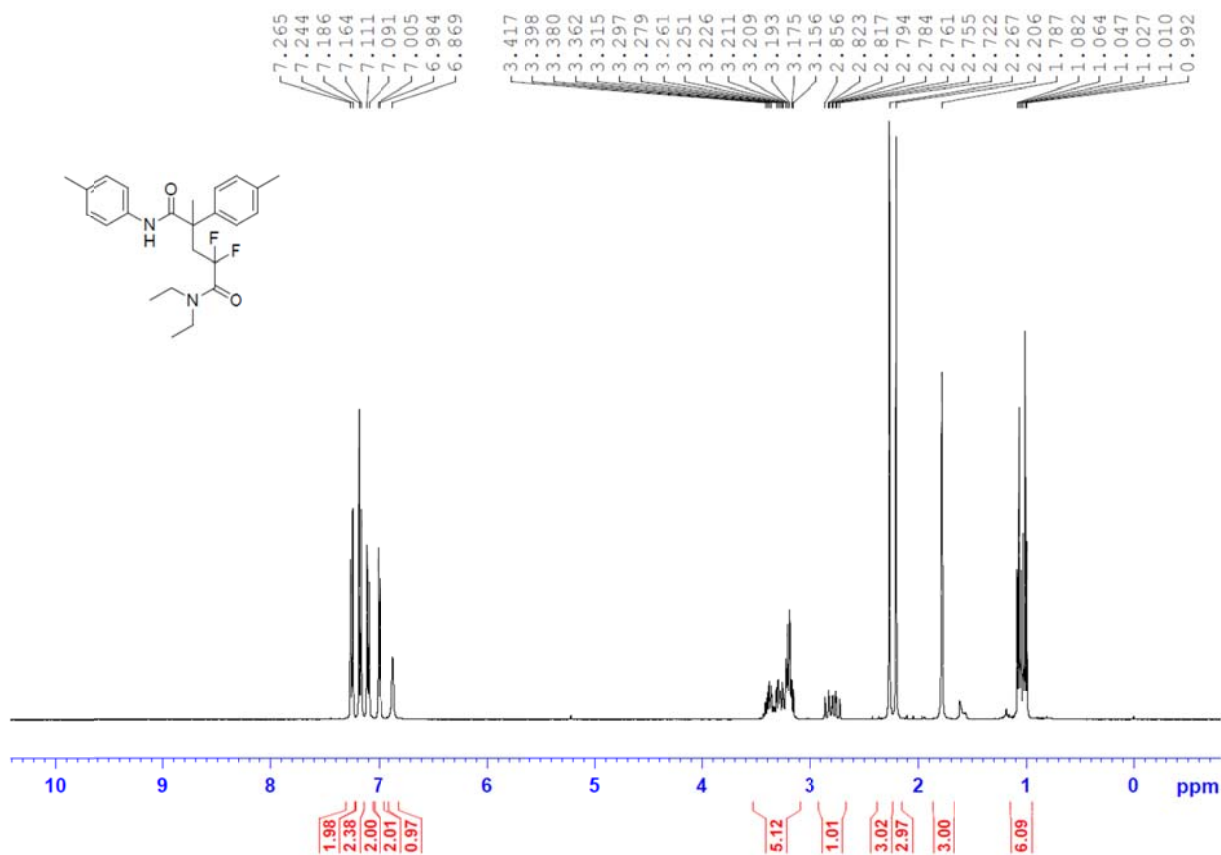

**$^{13}\text{C}$  NMR of  $N^1,N^1$ -diethyl-2,2-difluoro-4-methyl- $N^{5,4}$ -di-*p*-tolylpentanediamide (3c)**

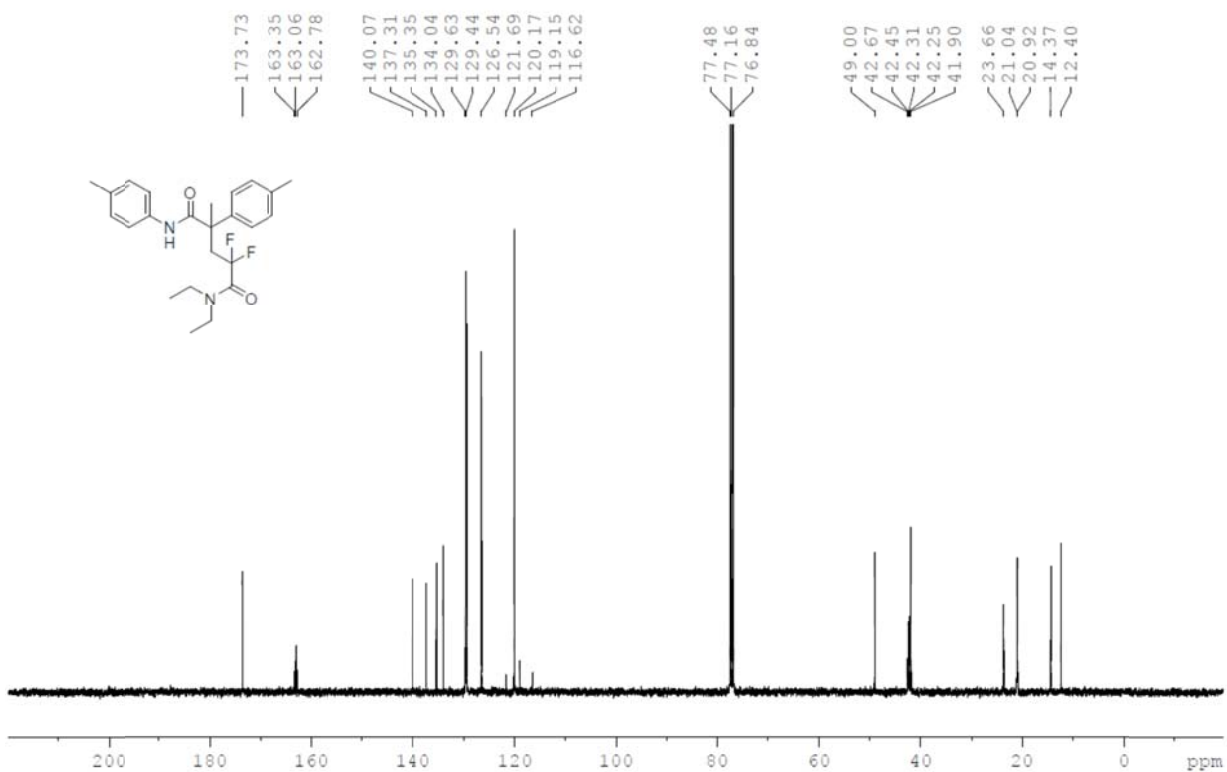



$^{19}\text{F}$  NMR of  $N^1, N^1$ -diethyl-2,2-difluoro-4-methyl- $N^{5,4}$ -di-*p*-tolylpentanediamide (3c)

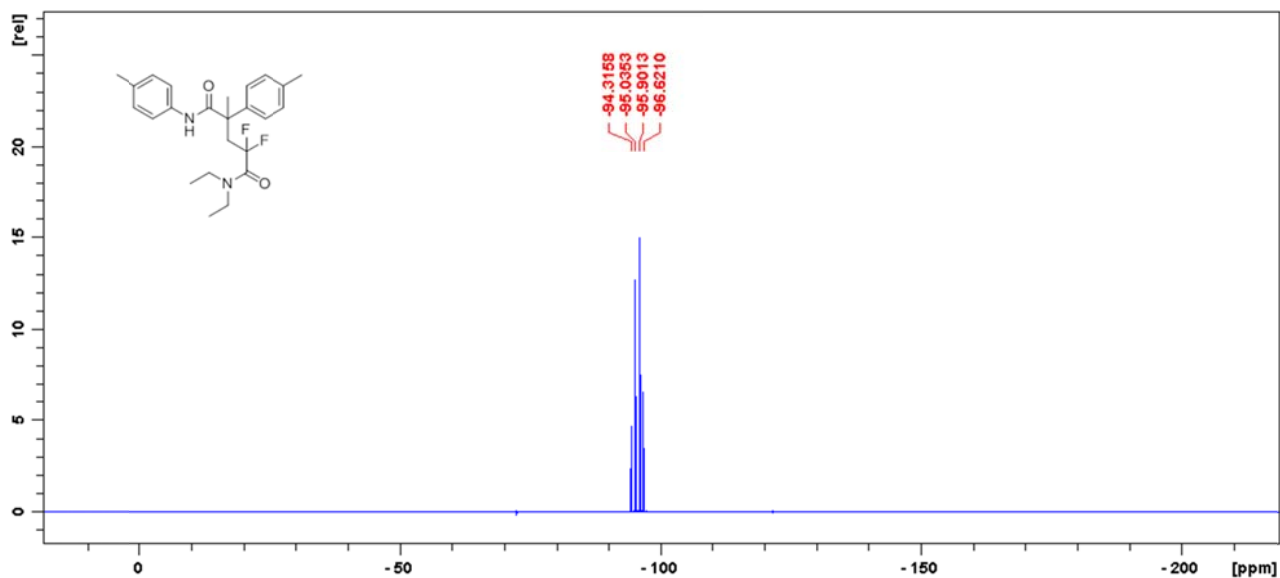

$^1\text{H}$  NMR of  $N^1$ -(4-(*tert*-butyl)phenyl)- $N^5, N^5$ -diethyl-4,4-difluoro-2-methyl-2-(*p*-tolyl)pentanediamide (3d)

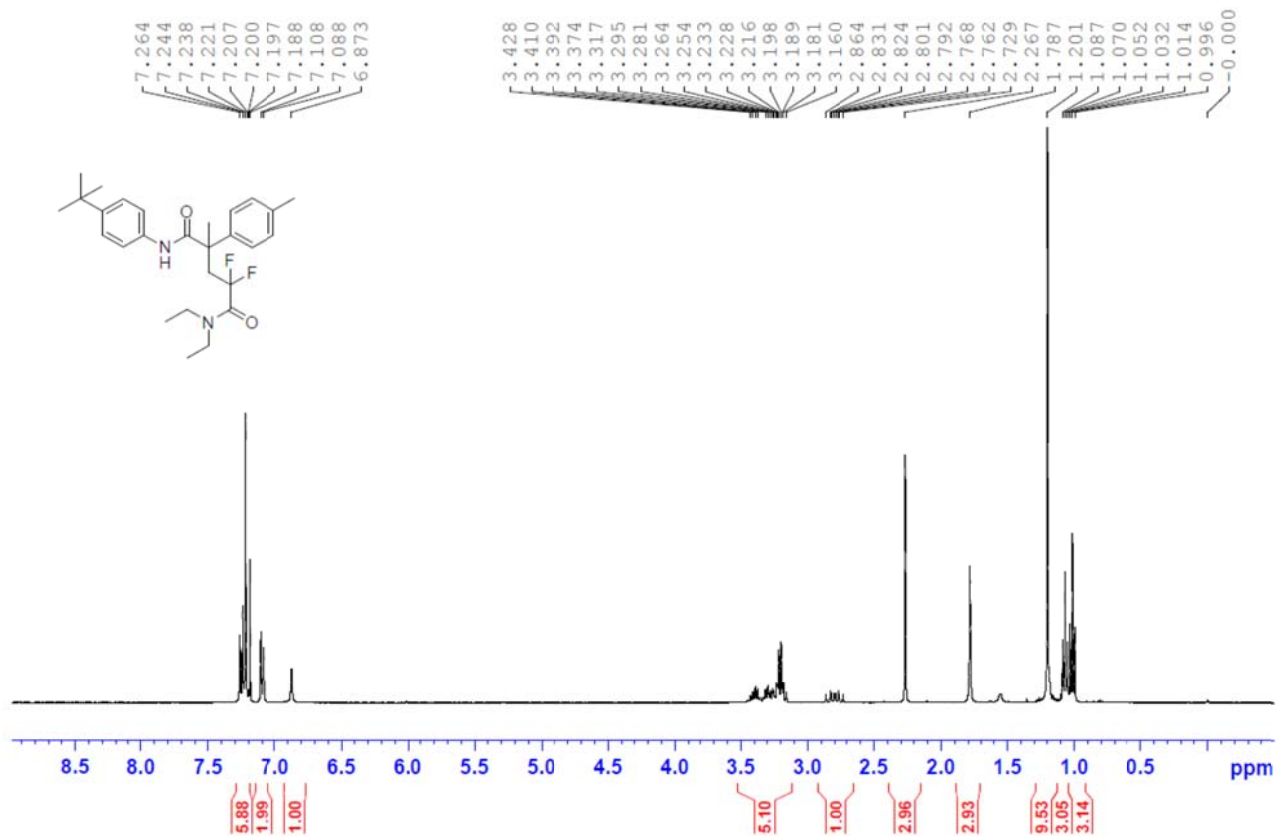

<sup>13</sup>C NMR of *N*<sup>1</sup>-(4-(*tert*-butyl)phenyl)-*N*<sup>5</sup>,*N*<sup>5</sup>-diethyl-4,4-difluoro-2-methyl-2-(*p*-tolyl)pentanediamide (3d)

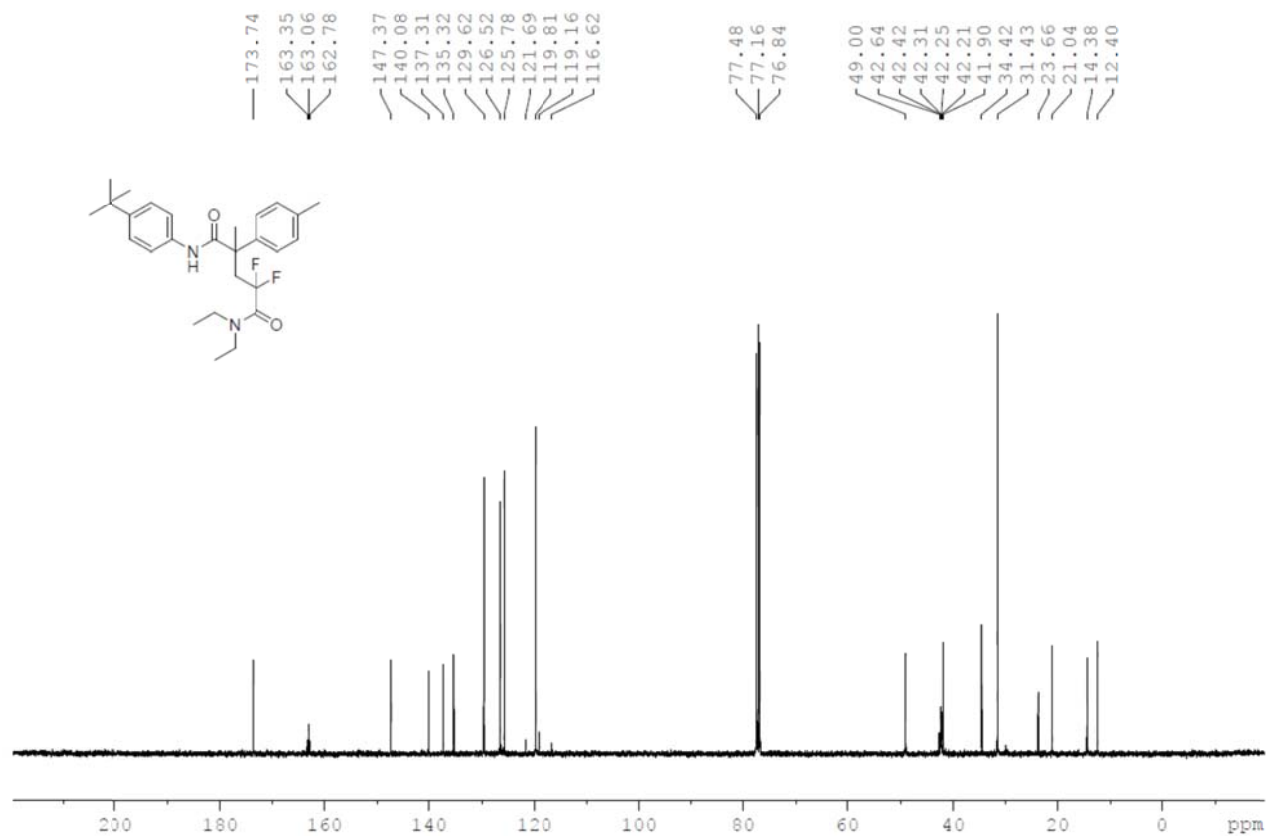

<sup>19</sup>F NMR of *N*<sup>1</sup>-(4-(*tert*-butyl)phenyl)-*N*<sup>5</sup>,*N*<sup>5</sup>-diethyl-4,4-difluoro-2-methyl-2-(*p*-tolyl)pentanediamide (3d)

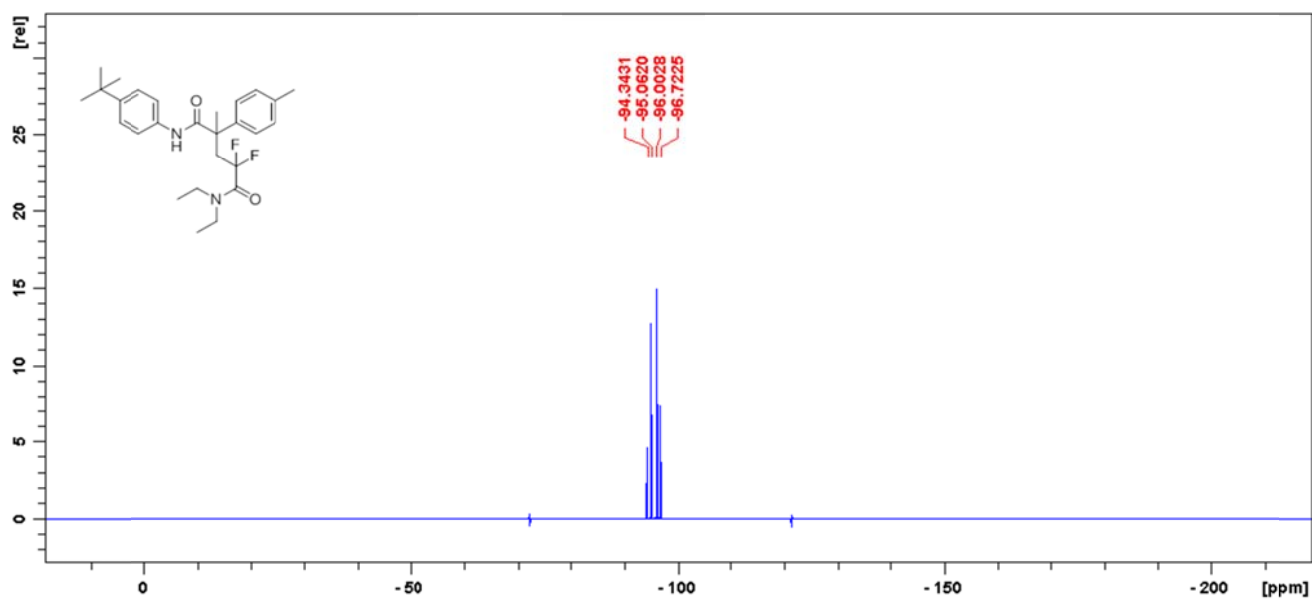

**<sup>1</sup>H NMR of N<sup>1</sup>-([1,1'-biphenyl]-4-yl)-N<sup>5</sup>,N<sup>5</sup>-diethyl-4,4-difluoro-2-methyl-2-(*p*-tolyl)pentanediamide (3e)**

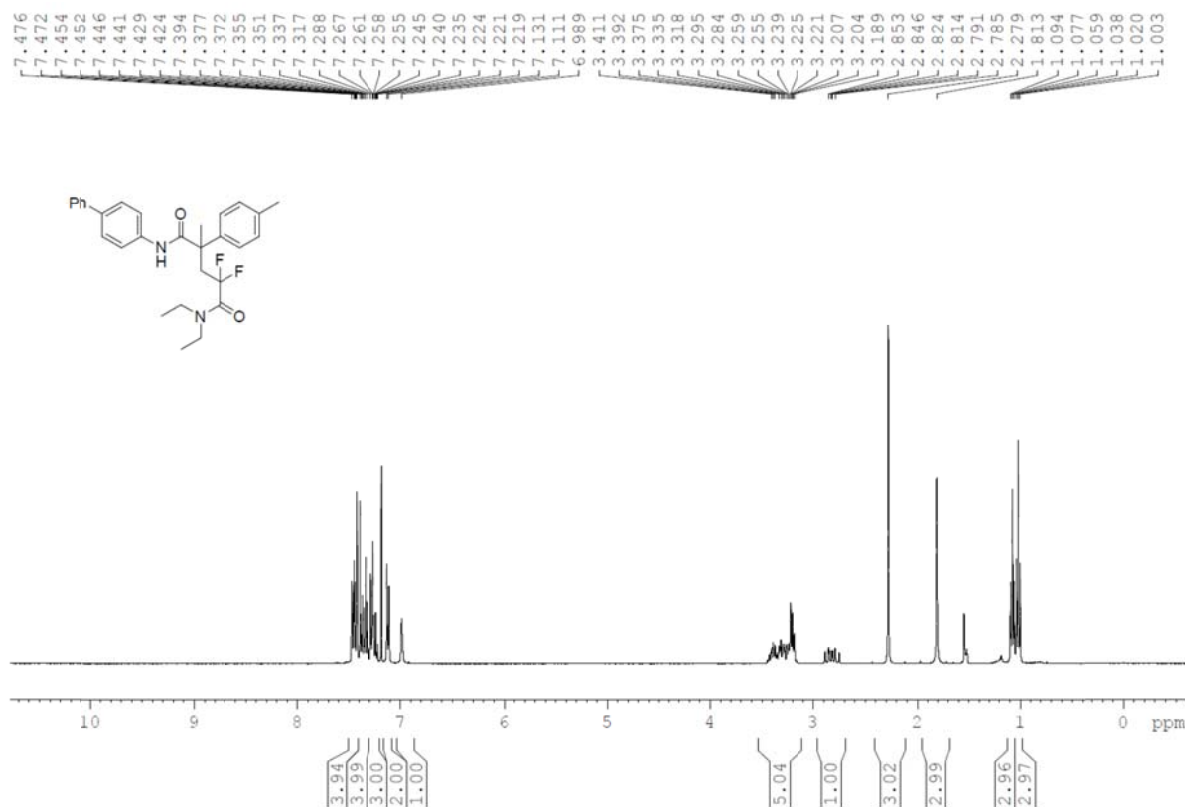

**<sup>13</sup>C NMR of N<sup>1</sup>-([1,1'-biphenyl]-4-yl)-N<sup>5</sup>,N<sup>5</sup>-diethyl-4,4-difluoro-2-methyl-2-(*p*-tolyl)pentanediamide (3e)**

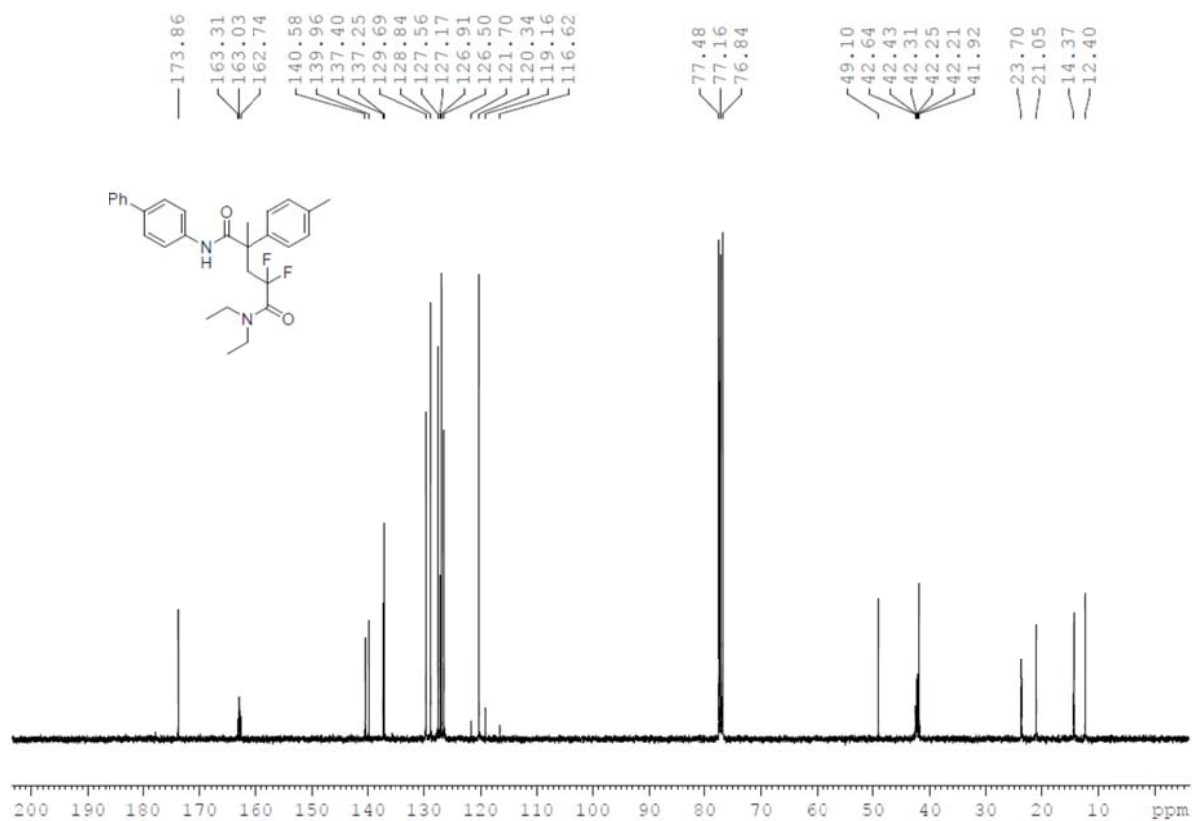

$^{19}\text{F}$  NMR of  $N^1$ -([1,1'-biphenyl]-4-yl)- $N^5,N^5$ -diethyl-4,4-difluoro-2-methyl-2-(*p*-tolyl)pentanediamide (3e)

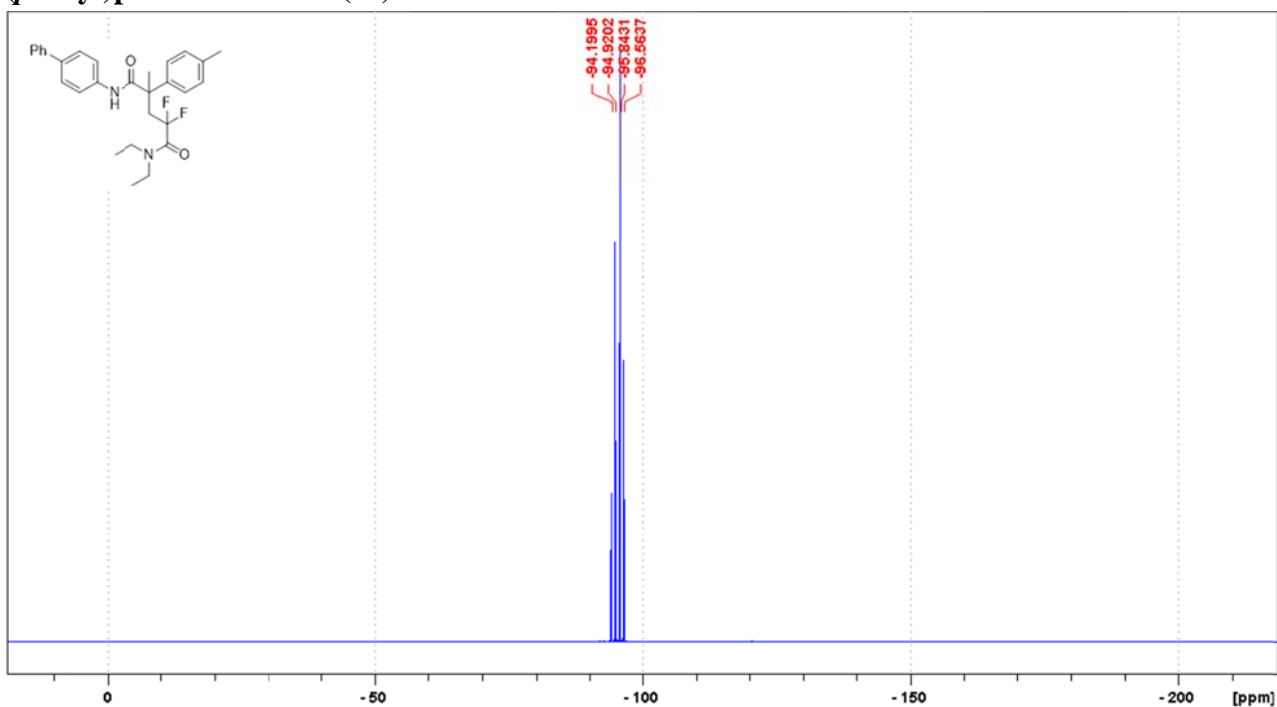

$^1\text{H}$  NMR of  $N^1$ -(4-chlorophenyl)- $N^5,N^5$ -diethyl-4,4-difluoro-2-methyl-2-(*p*-tolyl)pentanediamide (3f)

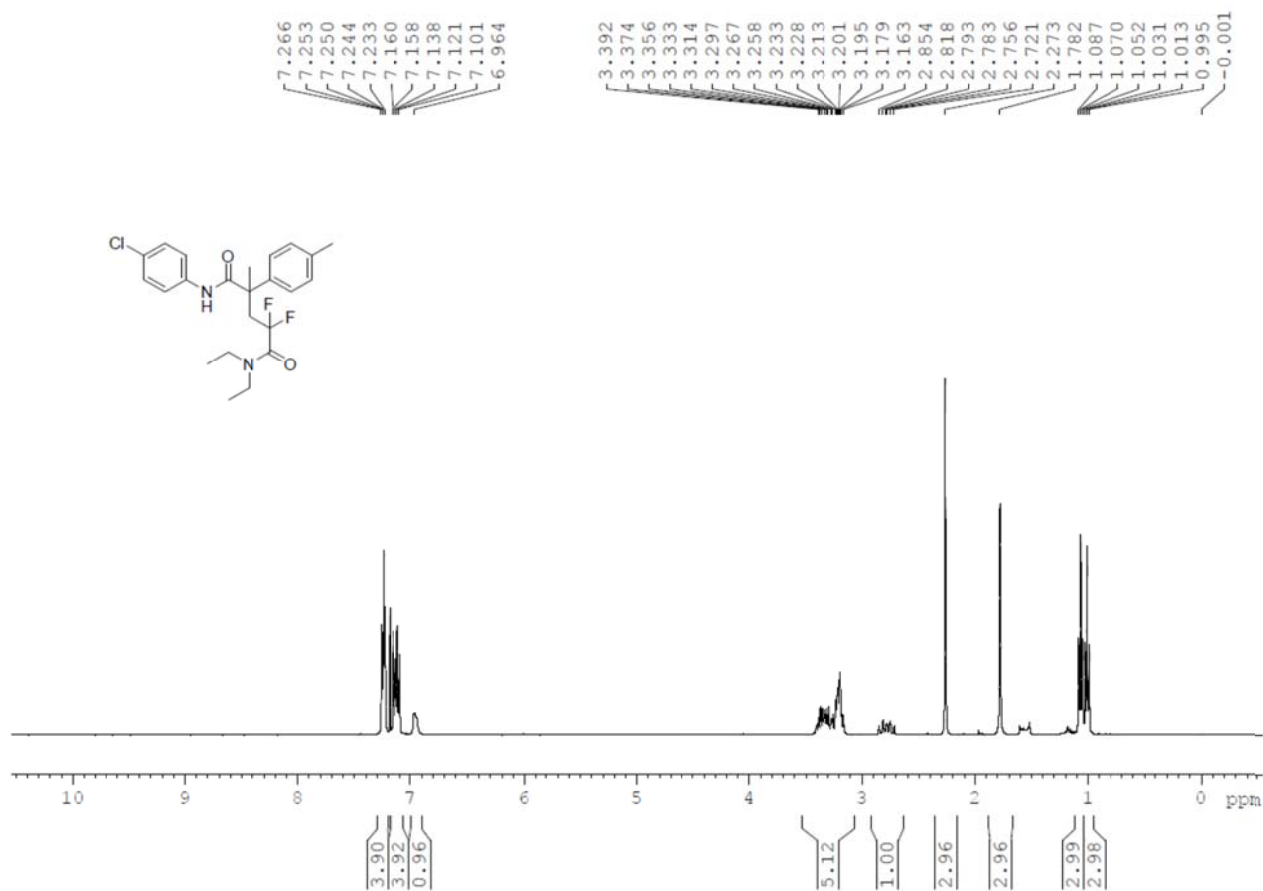

**$^{13}\text{C}$  NMR of  $N^1$ -(4-chlorophenyl)- $N^5,N^5$ -diethyl-4,4-difluoro-2-methyl-2-(*p*-tolyl)pentanediamide (3f)**

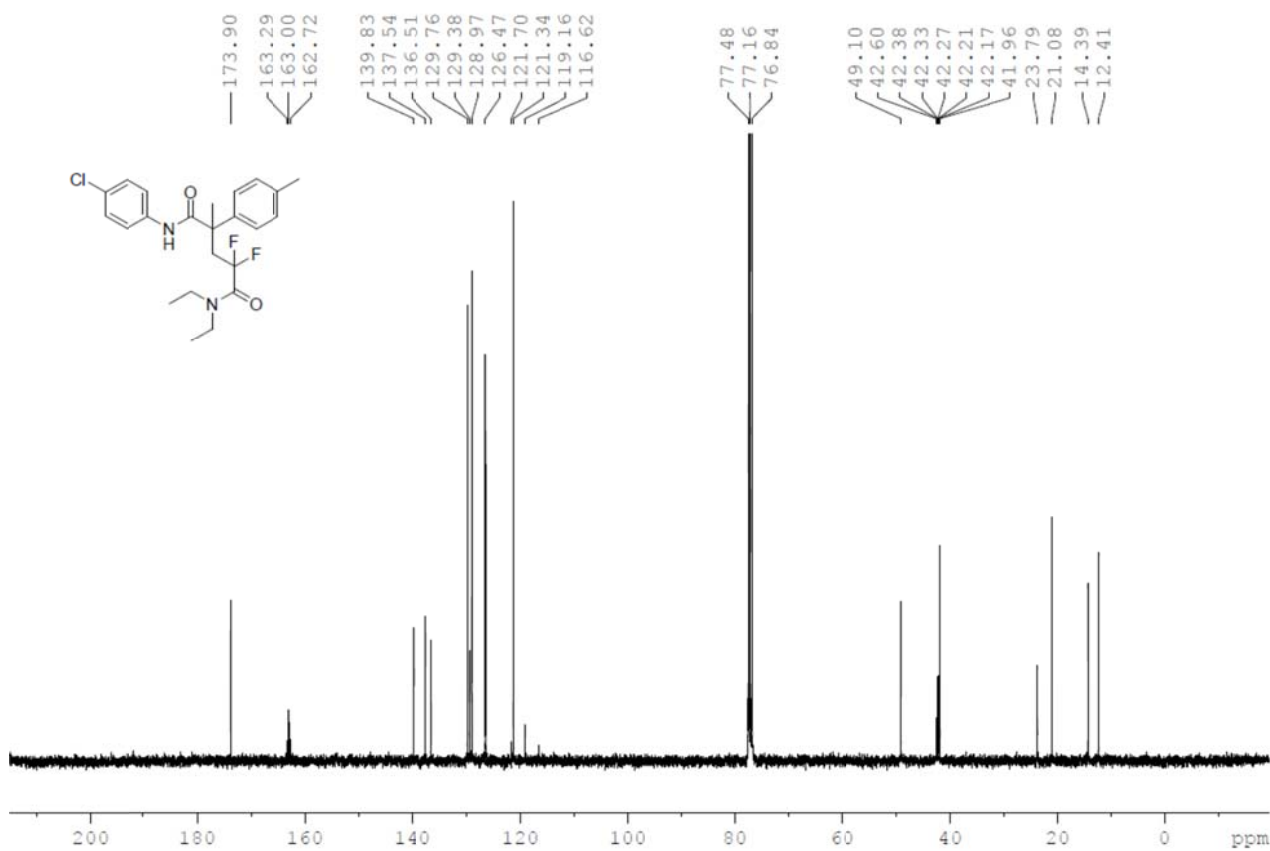

**$^{19}\text{F}$  NMR of  $N^1$ -(4-chlorophenyl)- $N^5,N^5$ -diethyl-4,4-difluoro-2-methyl-2-(*p*-tolyl)pentanediamide (3f)**

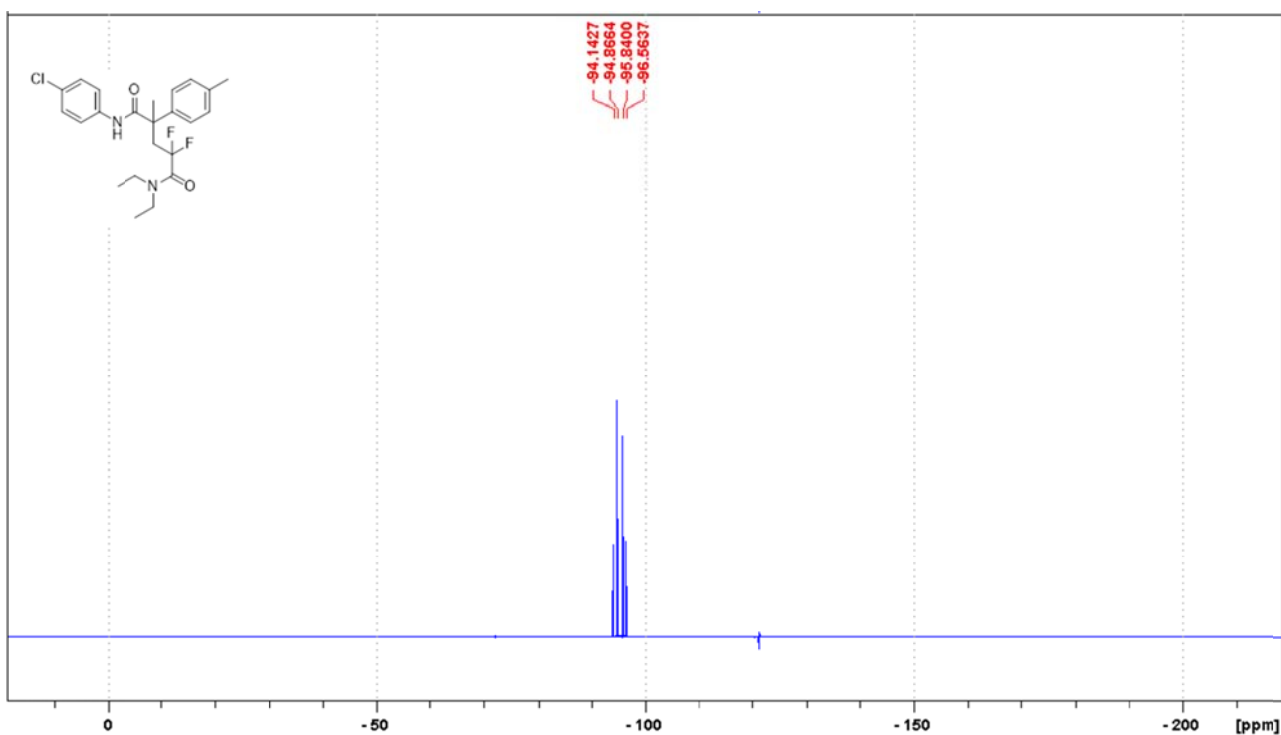

**<sup>1</sup>H NMR of (p-tolyl)pentanediamide (3g)**

7.305  
7.300  
7.288  
7.283  
7.276  
7.249  
7.228  
7.223  
7.215  
7.210  
7.198  
7.193  
7.190  
7.119  
7.099  
6.969

**<sup>1</sup>H NMR of *N*<sup>1</sup>-(4-bromophenyl)-*N*<sup>5</sup>,*N*<sup>5</sup>-diethyl-4,4-difluoro-2-methyl-2-(p-tolyl)pentanediamide (3g)**

3.409  
3.391  
3.373  
3.355  
3.331  
3.313  
3.295  
3.276  
3.265  
3.256  
3.232  
3.226  
3.216  
3.209  
3.198  
3.192  
3.180  
3.174  
3.161  
2.849  
2.816  
2.809  
2.787  
2.777  
2.755  
2.748  
2.715  
2.271  
1.778  
1.086  
1.069  
1.051  
1.029  
1.011  
0.993  
0.000

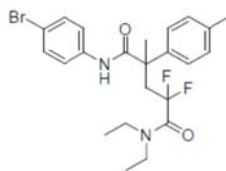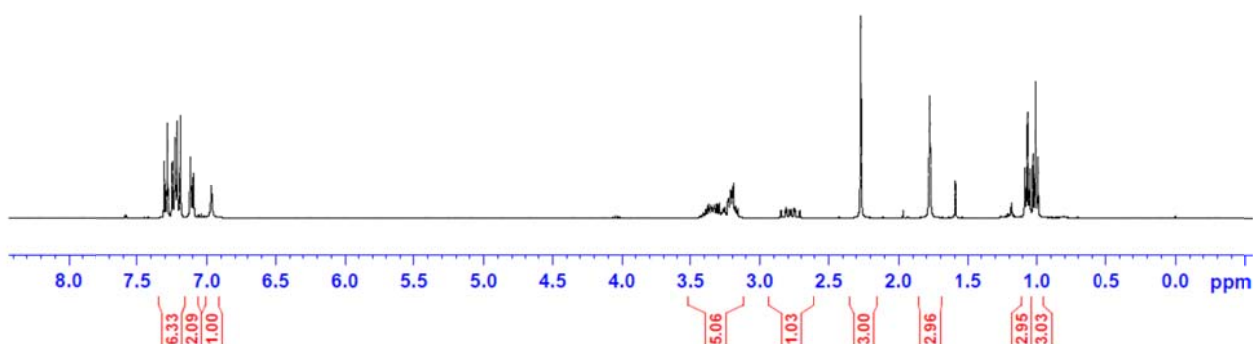

**<sup>13</sup>C NMR of (p-tolyl)pentanediamide (3g)**

**<sup>13</sup>C NMR of *N*<sup>1</sup>-(4-bromophenyl)-*N*<sup>5</sup>,*N*<sup>5</sup>-diethyl-4,4-difluoro-2-methyl-2-(p-tolyl)pentanediamide (3g)**

173.88  
163.26  
162.98  
162.69

139.79  
137.52  
137.02  
131.89  
129.74  
126.44  
121.66  
119.13  
116.95  
116.59

77.48  
77.16  
76.84

49.10  
42.57  
42.36  
42.32  
42.26  
42.20  
42.14  
41.95  
23.75  
21.07  
14.38  
12.40

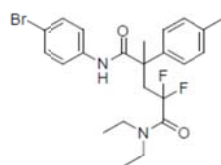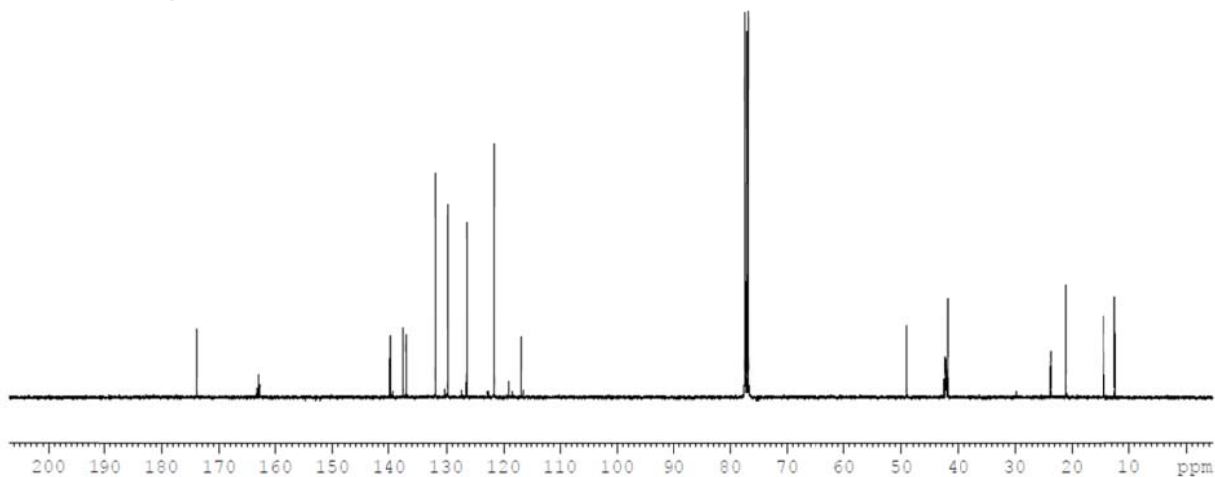

<sup>19</sup>F NMR of *N*<sup>1</sup>-(4-bromophenyl)-*N*<sup>5</sup>,*N*<sup>5</sup>-diethyl-4,4-difluoro-2-methyl-2-(*p*-tolyl)pentanediamide (3g)

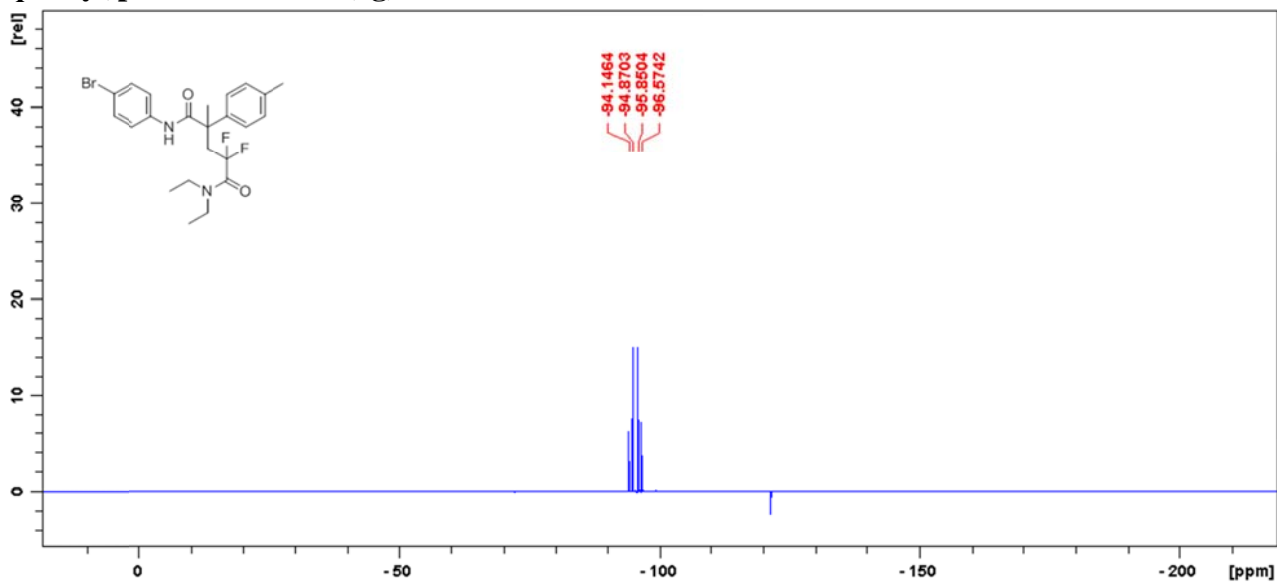

<sup>1</sup>H NMR of *N*<sup>1</sup>,*N*<sup>1</sup>-diethyl-2,2-difluoro-*N*<sup>5</sup>-(3-methoxyphenyl)-4-methyl-4-(*p*-tolyl)pentanediamide (3h)

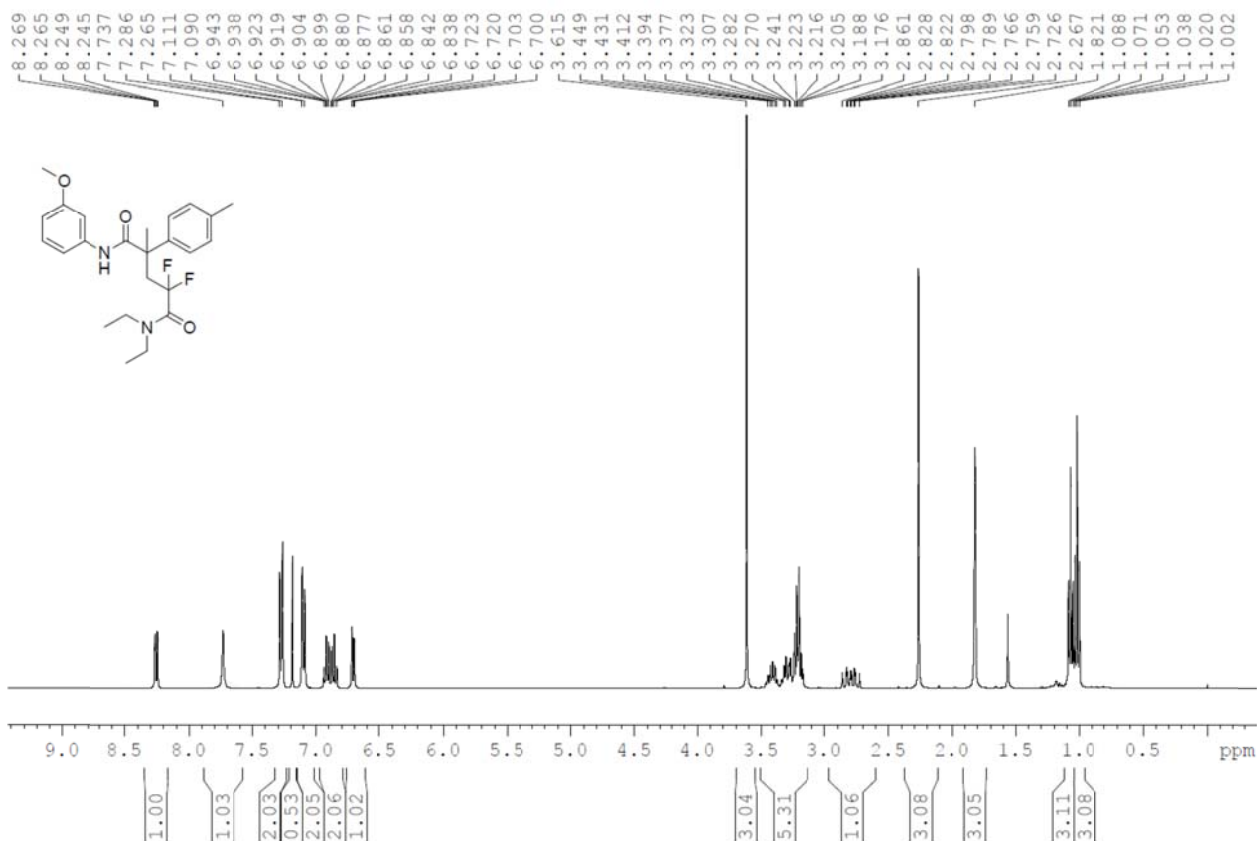

<sup>13</sup>C NMR of *N*<sup>1</sup>,*N*<sup>1</sup>-diethyl-2,2-difluoro-*N*<sup>5</sup>-(3-methoxyphenyl)-4-methyl-4-(*p*-tolyl)pentanediamide (3h)

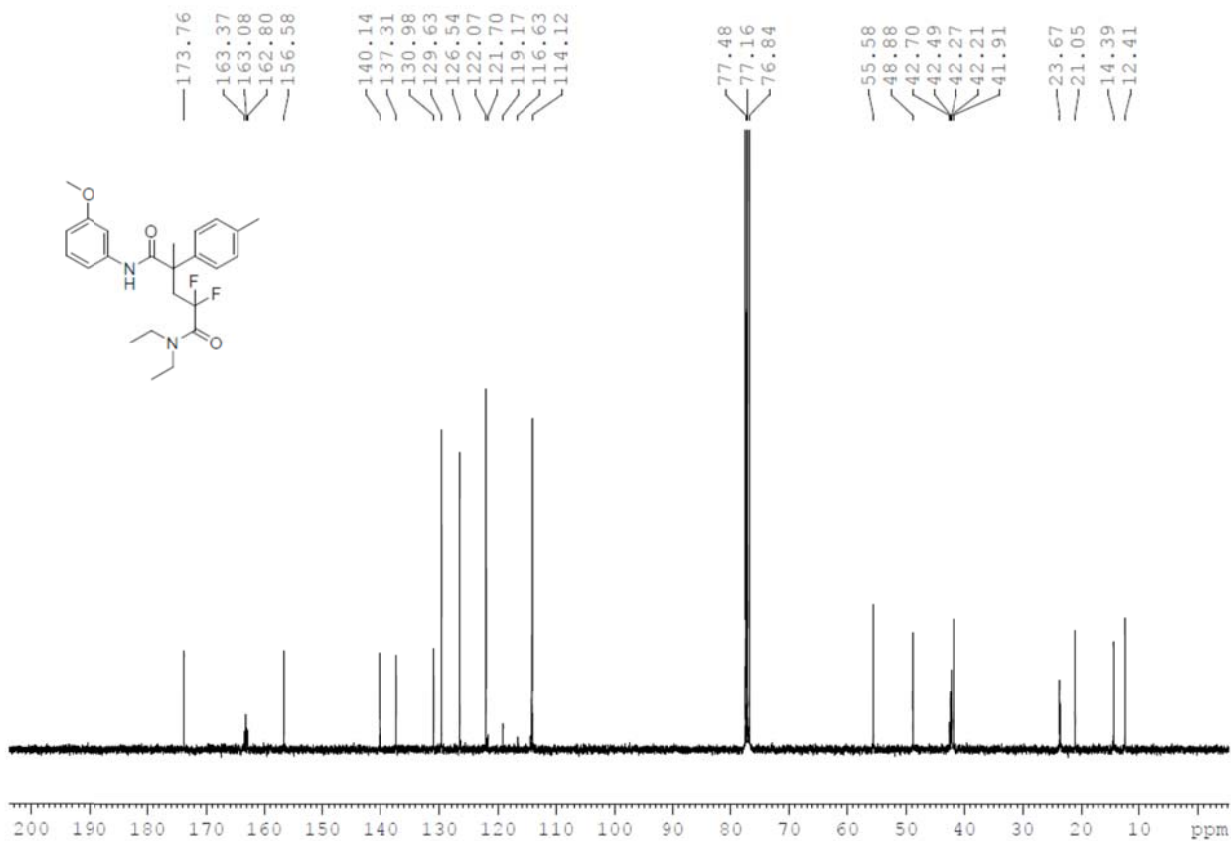

<sup>19</sup>F NMR of *N*<sup>1</sup>,*N*<sup>1</sup>-diethyl-2,2-difluoro-*N*<sup>5</sup>-(3-methoxyphenyl)-4-methyl-4-(*p*-tolyl)pentanediamide (3h)

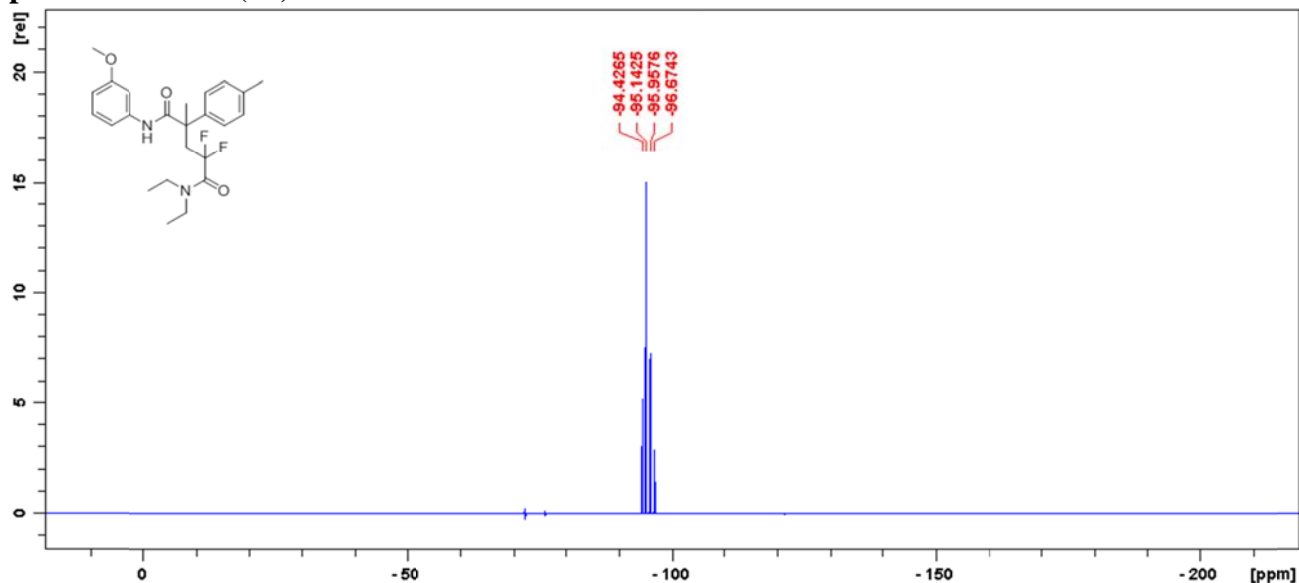



**$^1\text{H}$  NMR of  $N^1,N^1$ -diethyl-2,2-difluoro-4-methyl- $N^5$ -(*m*-tolyl)-4-(*p*-tolyl) pentanediamide (3i)**

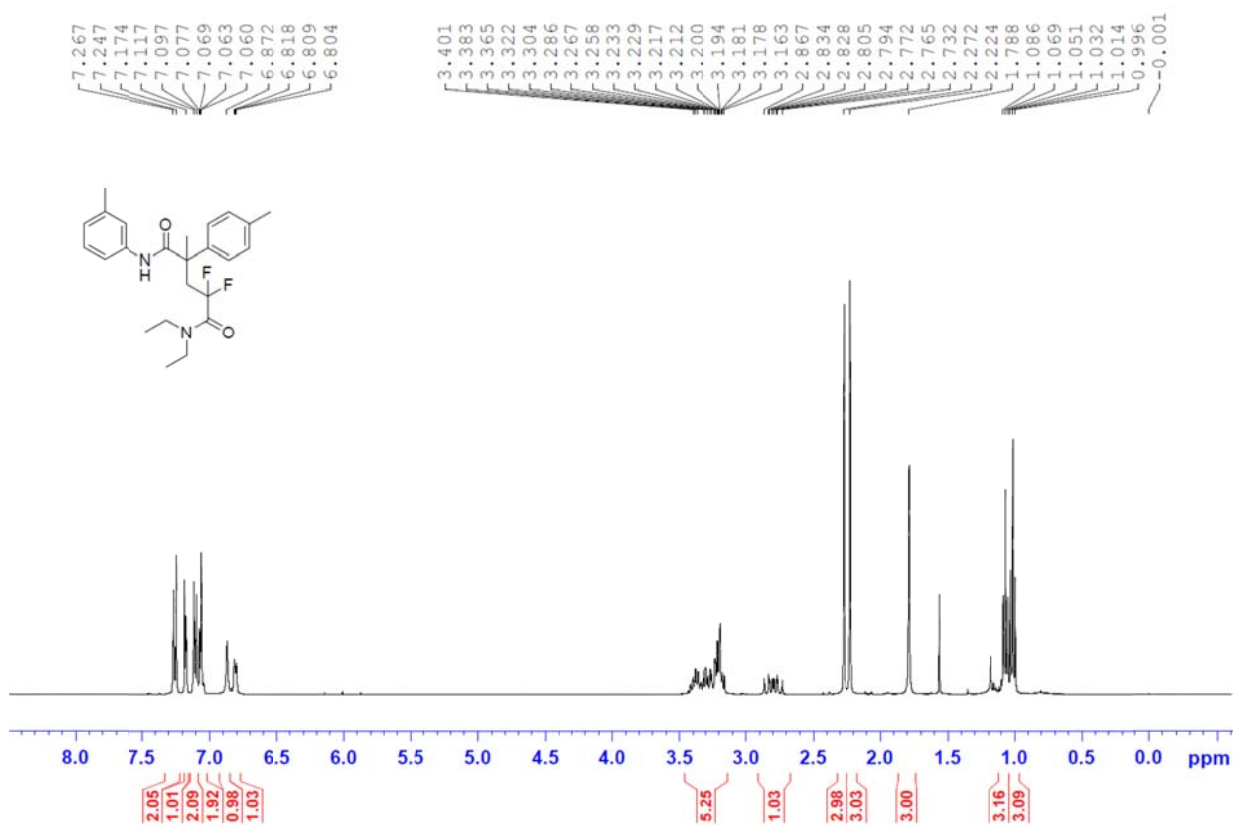

**$^{13}\text{C}$  NMR of  $N^1,N^1$ -diethyl-2,2-difluoro-4-methyl- $N^5$ -(*m*-tolyl)-4-(*p*-tolyl) pentanediamide (3i)**

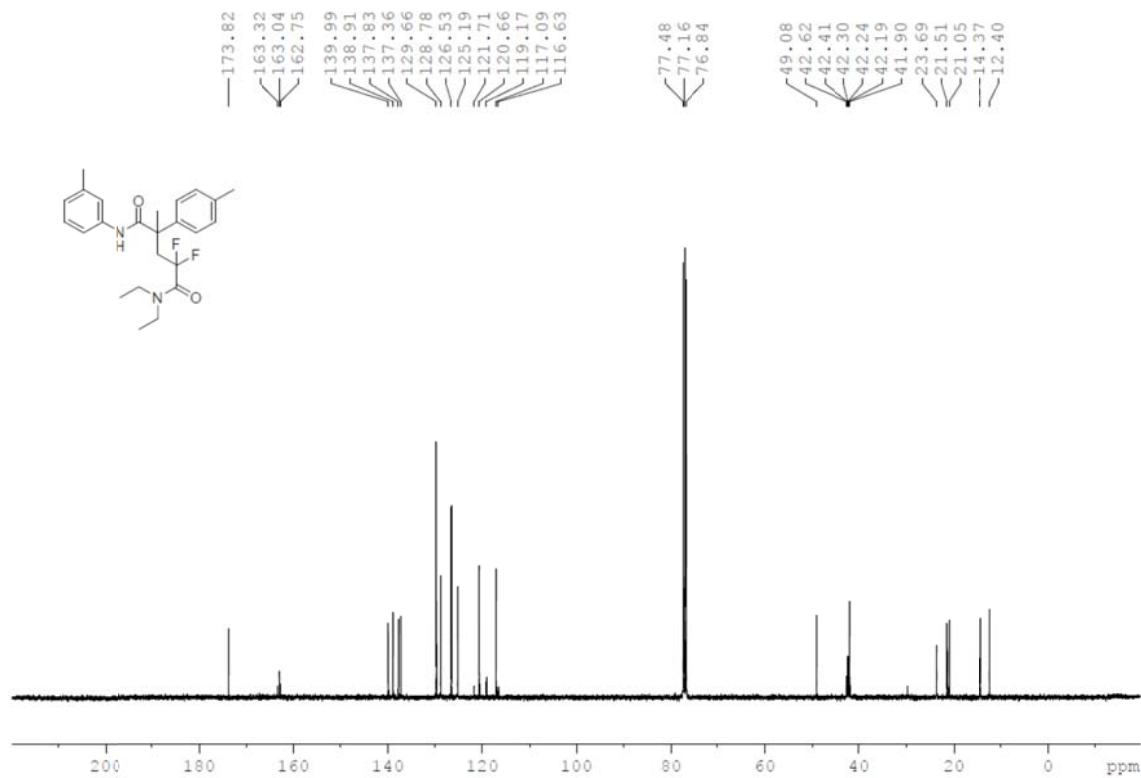

**$^{19}\text{F}$  NMR of  $N^1,N^1$ -diethyl-2,2-difluoro-4-methyl- $N^5$ -(*m*-tolyl)-4-(*p*-tolyl) pentanediamide (3i)**

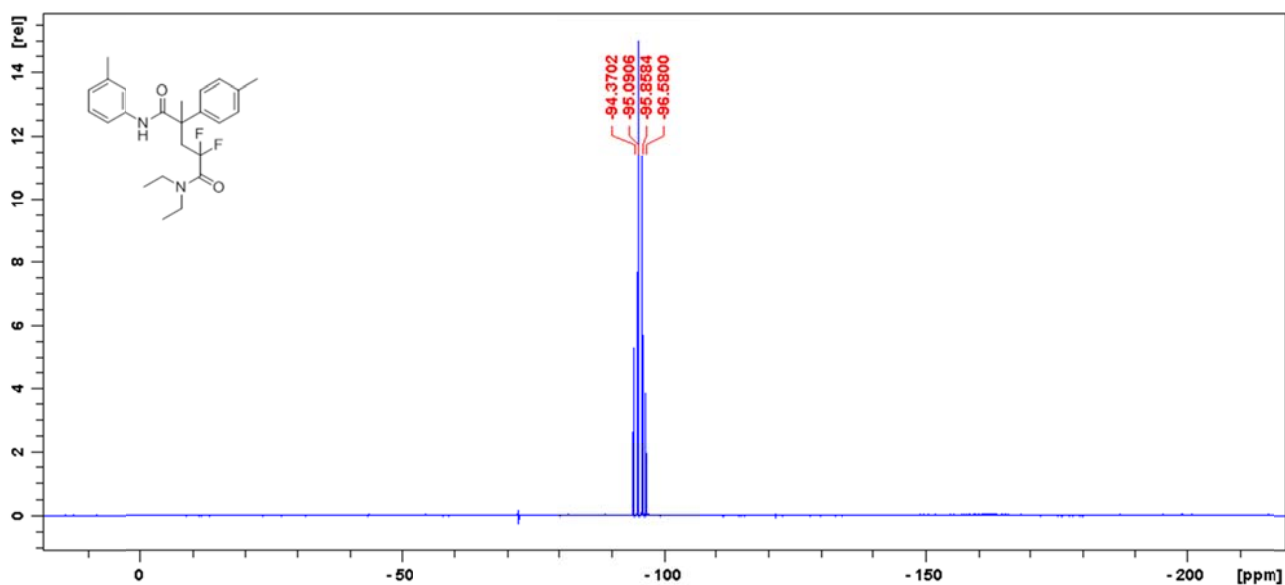

**$^1\text{H}$  NMR of  $N^1$ -(3-chlorophenyl)- $N^5,N^5$ -diethyl-4,4-difluoro-2-methyl-2-(*p*-tolyl) pentanediamide (3)**

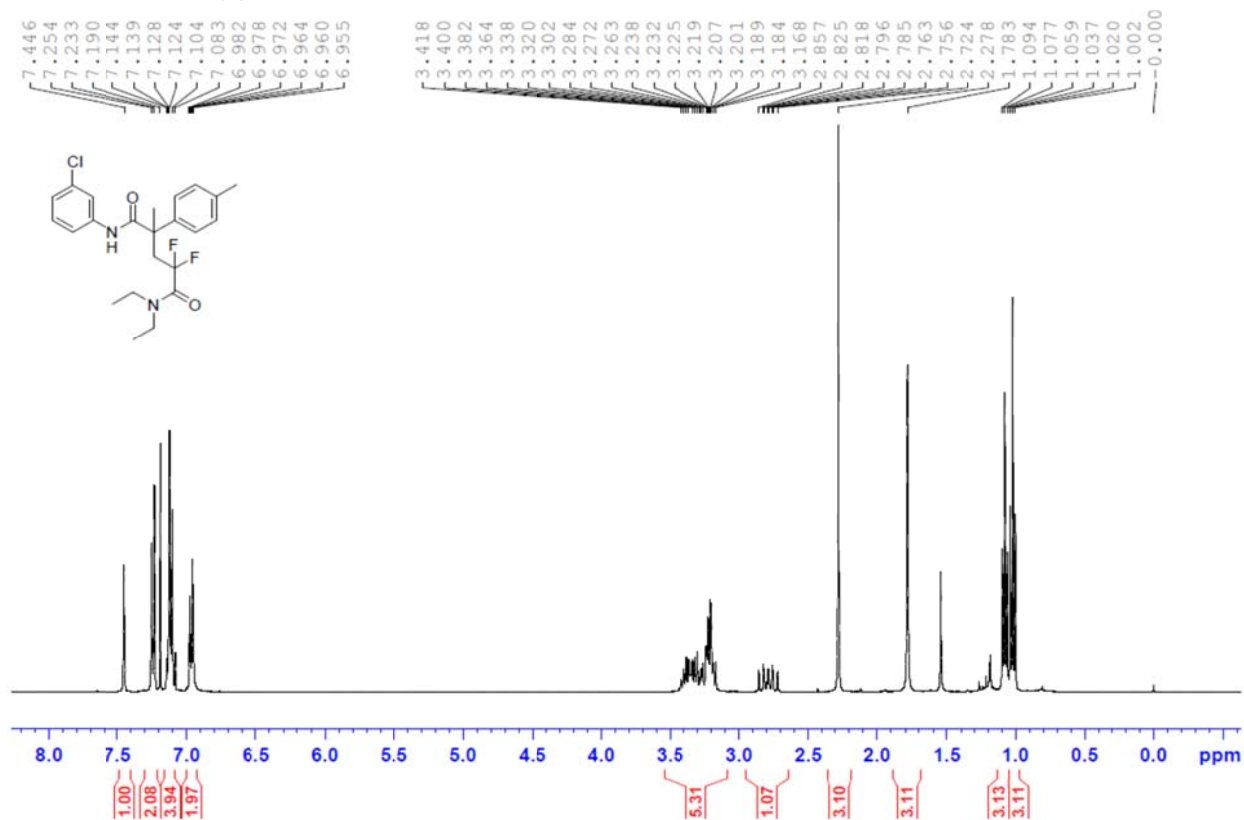

**<sup>13</sup>C NMR of *N*<sup>1</sup>-(3-chlorophenyl)-*N*<sup>5</sup>,*N*<sup>5</sup>-diethyl-4,4-difluoro-2-methyl-2-(*p*-tolyl) pentanediamide (3)**

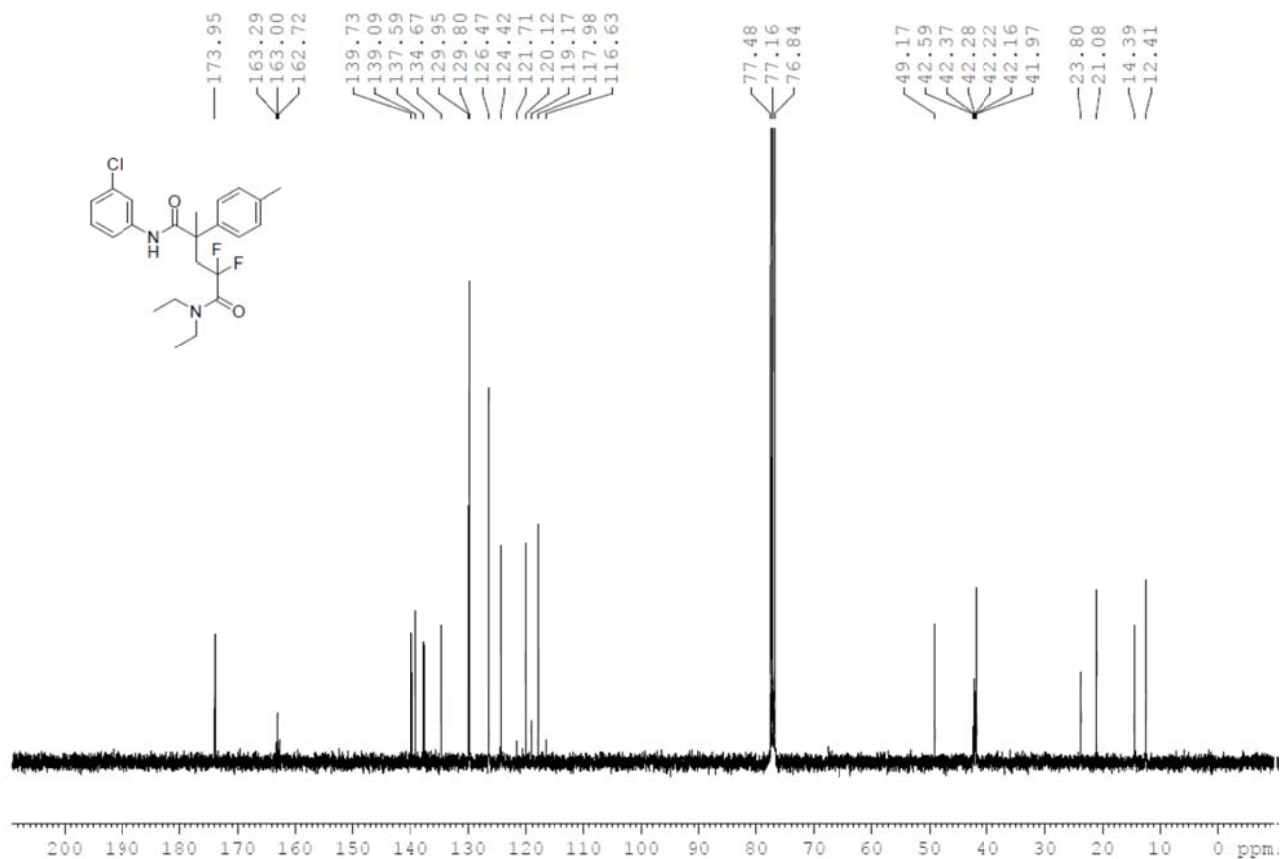

**<sup>19</sup>F NMR of *N*<sup>1</sup>-(3-chlorophenyl)-*N*<sup>5</sup>,*N*<sup>5</sup>-diethyl-4,4-difluoro-2-methyl-2-(*p*-tolyl) pentanediamide (3)**

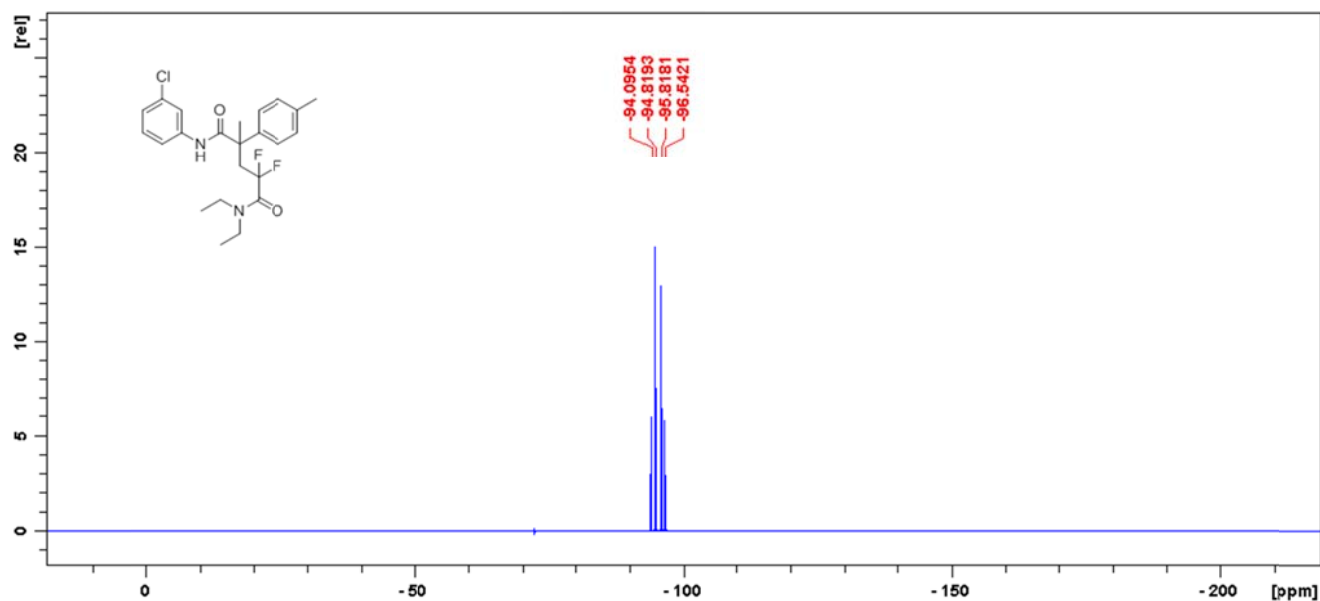

**$^1\text{H}$  NMR of  $N^1$ -(3-bromophenyl)- $N^5,N^5$ -diethyl-4,4-difluoro-2-methyl-2-(*p*-tolyl) pentanediamide (3j)**

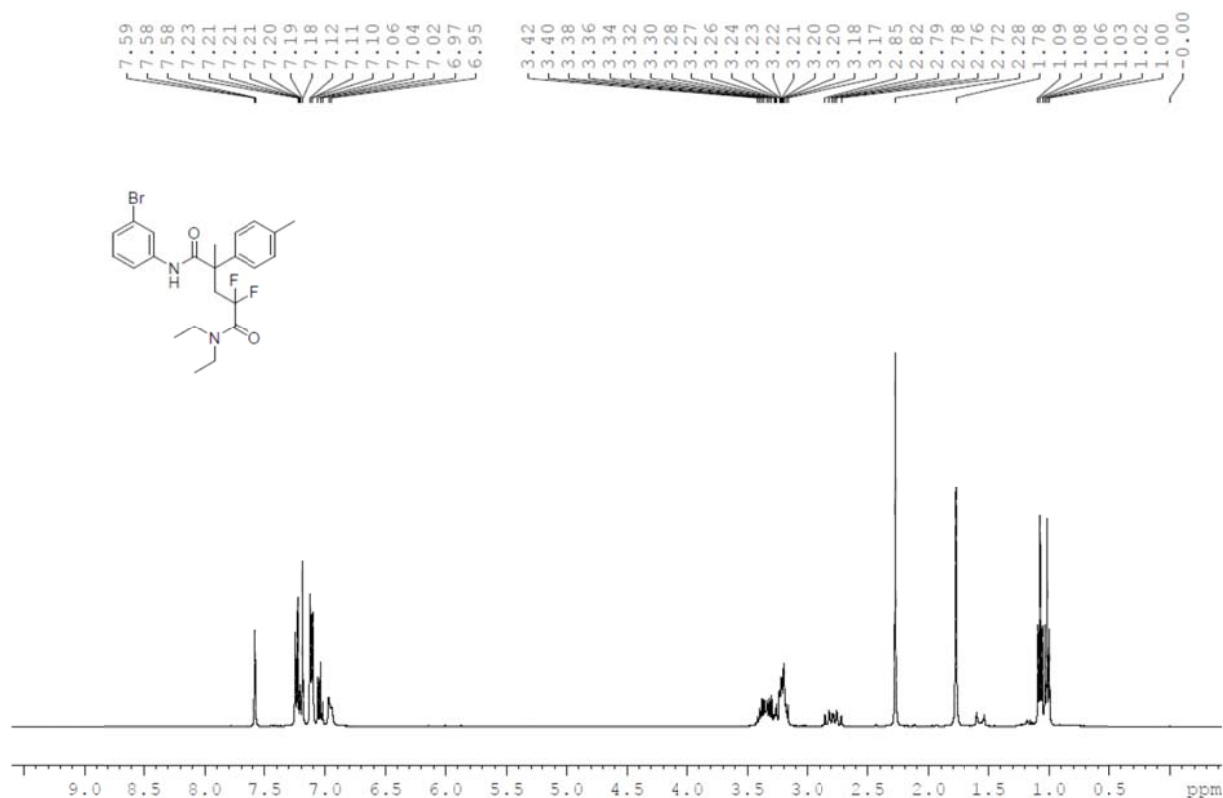

**$^{13}\text{C}$  NMR of  $N^1$ -(3-bromophenyl)- $N^5,N^5$ -diethyl-4,4-difluoro-2-methyl-2-(*p*-tolyl) pentanediamide (3j)**

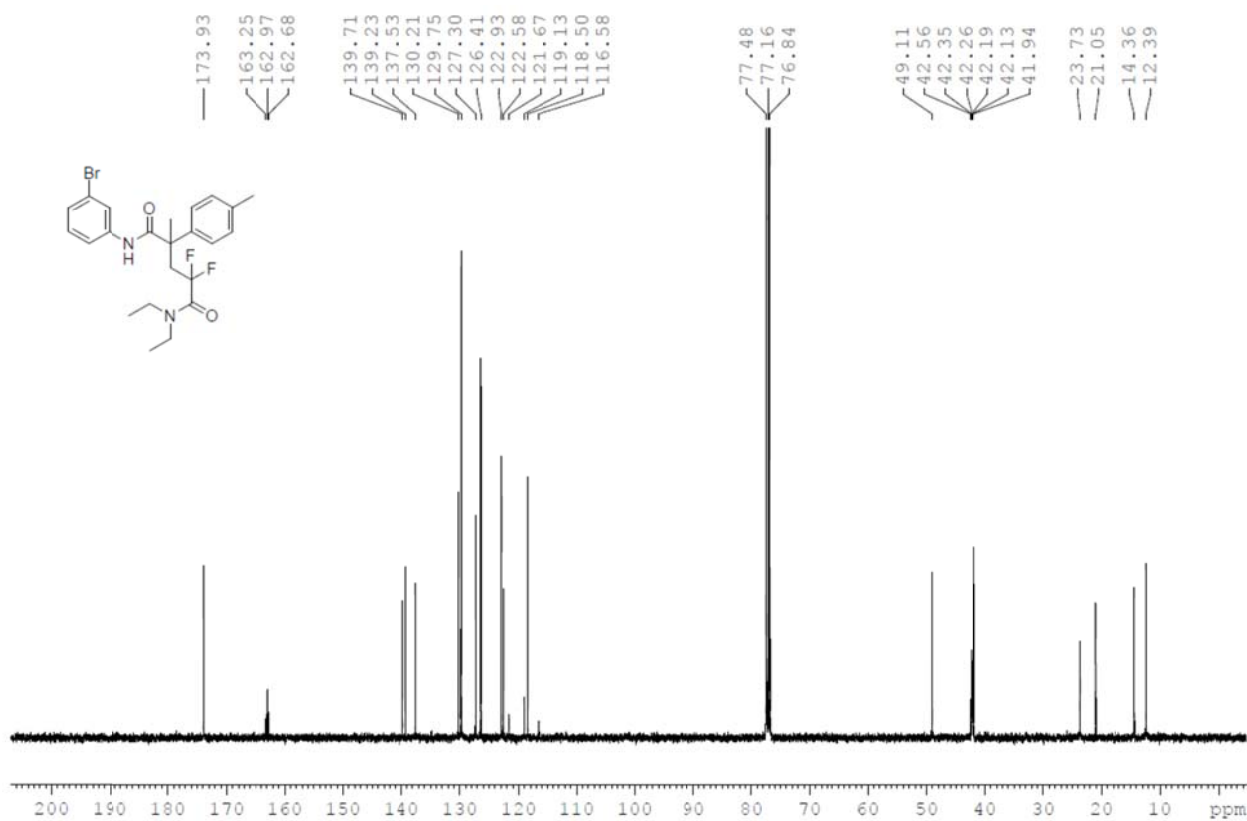

$^{19}\text{F}$  NMR of  $N^1$ -(3-bromophenyl)- $N^5,N^5$ -diethyl-4,4-difluoro-2-methyl-2-(*p*-tolyl) pentanediamide (3j)

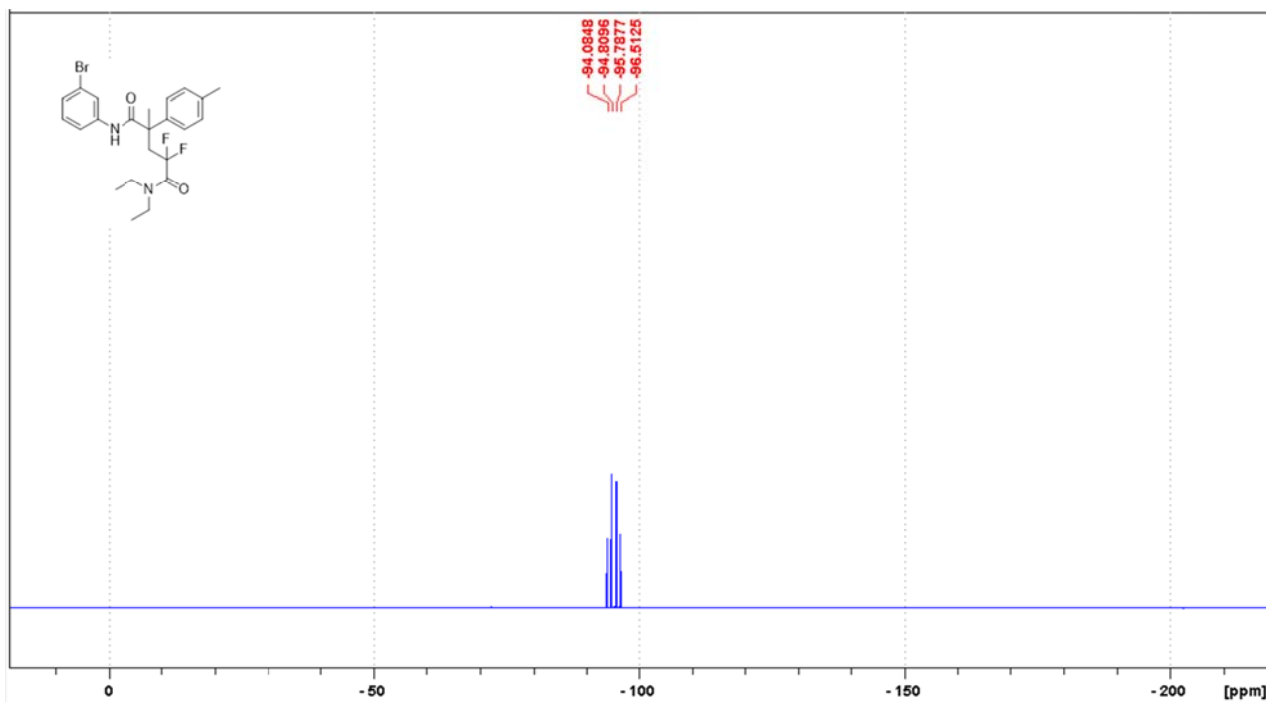

$^1\text{H}$  NMR of  $N^1,N^1$ -diethyl-2,2-difluoro- $N^5$ -(2-methoxyphenyl)-4-methyl-4-(*p*-tolyl) pentanediamide (3k)

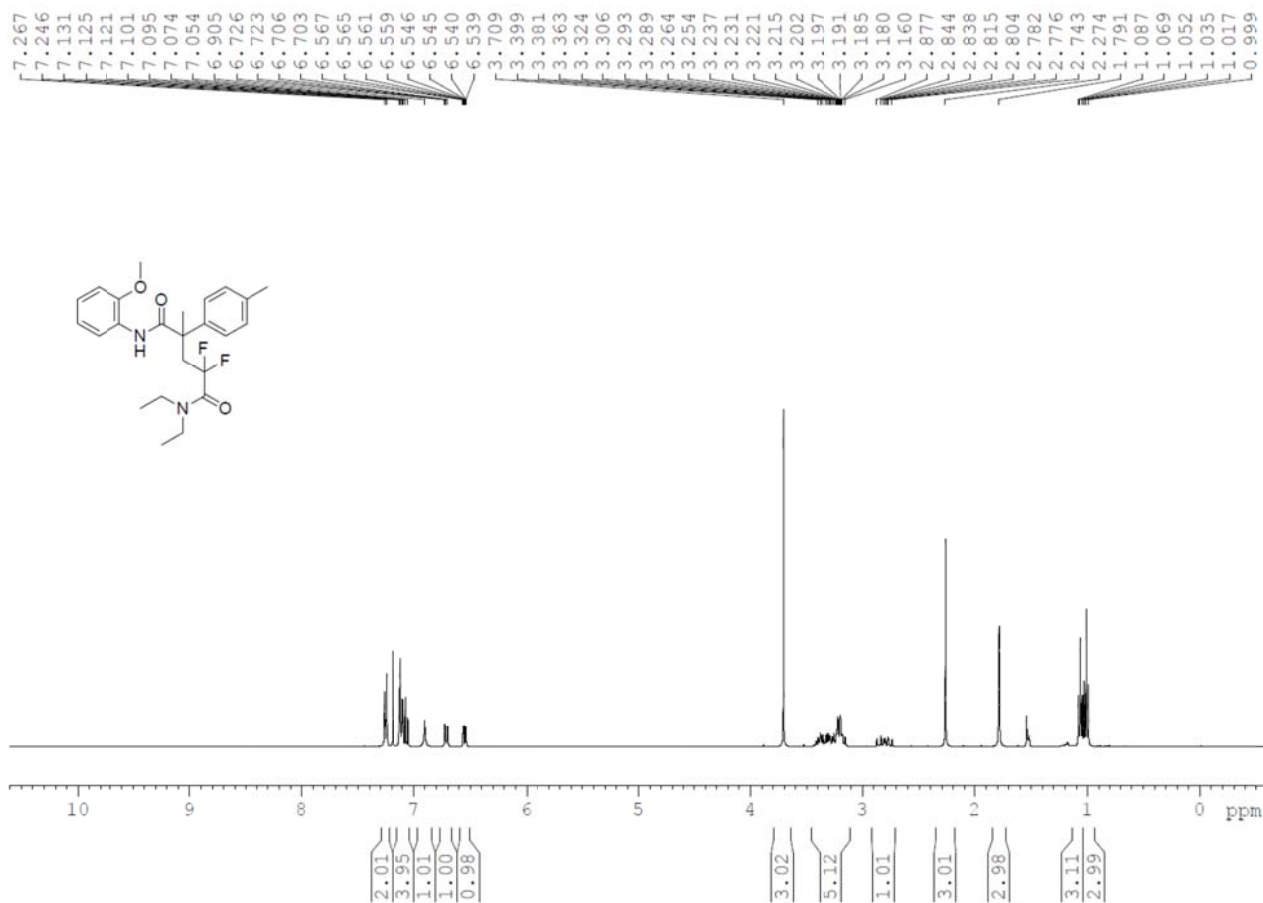

**<sup>13</sup>C NMR of *N*<sup>1</sup>,*N*<sup>1</sup>-diethyl-2,2-difluoro-*N*<sup>5</sup>-(2-methoxyphenyl)-4-methyl-4-(*p*-tolyl)pentanediamide (3k)**

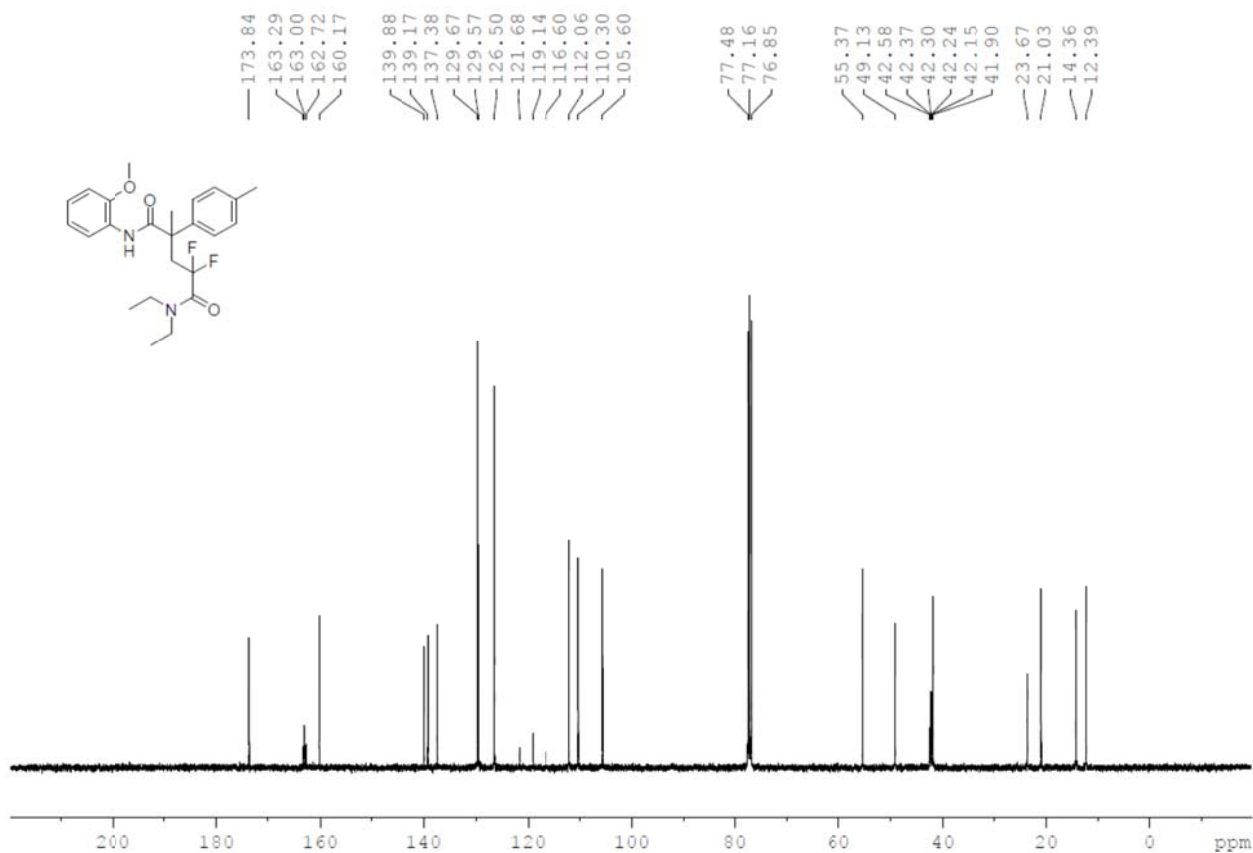

**<sup>19</sup>F NMR of *N*<sup>1</sup>,*N*<sup>1</sup>-diethyl-2,2-difluoro-*N*<sup>5</sup>-(2-methoxyphenyl)-4-methyl-4-(*p*-tolyl)pentanediamide (3k)**

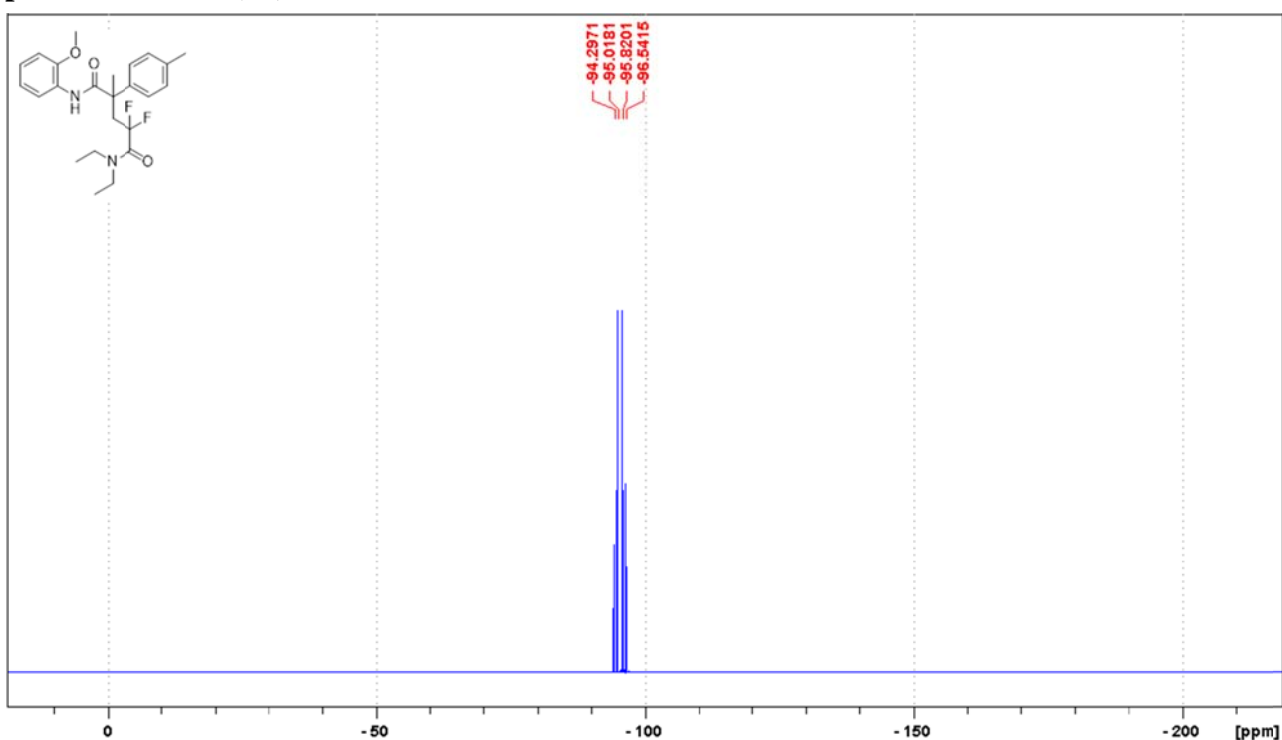

**$^1\text{H}$  NMR of  $N^1,N^1$ -diethyl-2,2-difluoro-4-methyl- $N^5$ -(*o*-tolyl)-4-(*p*-tolyl) pentanediamide (3l)**

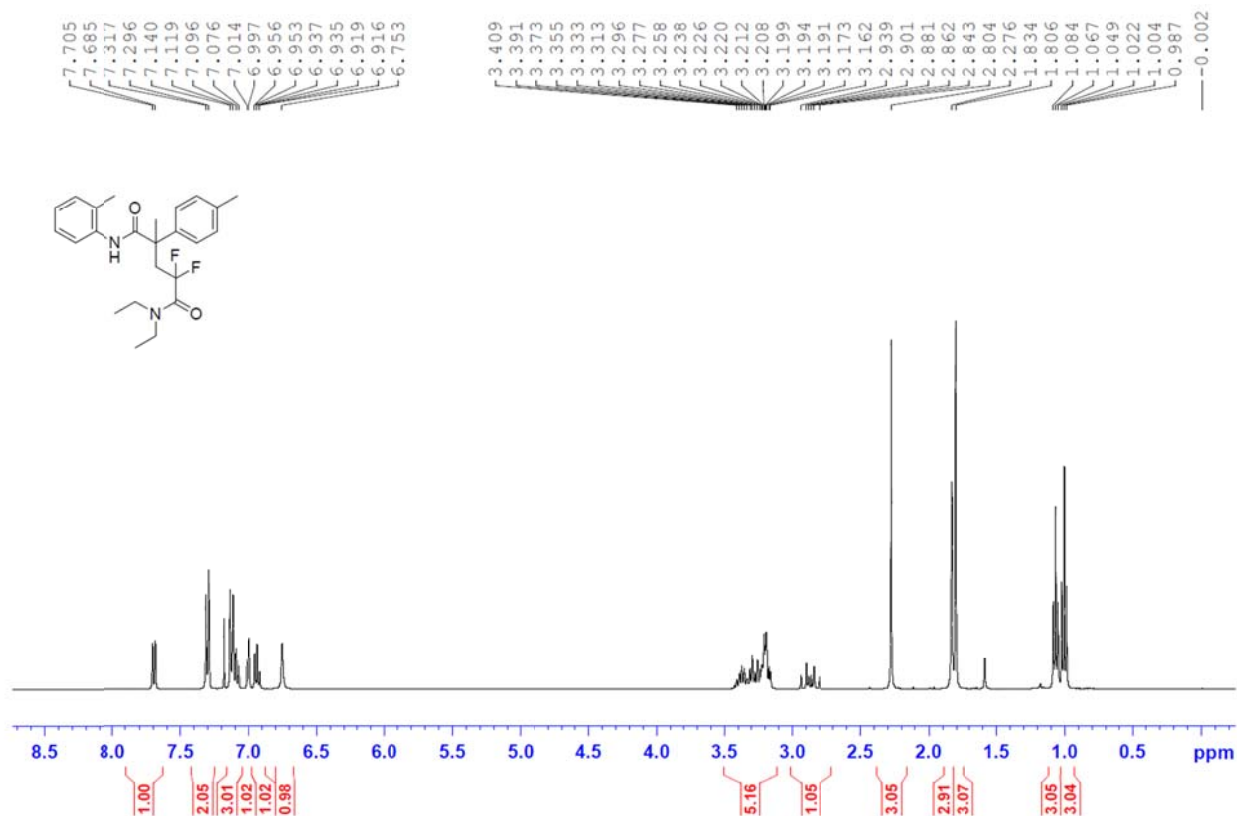

**$^{13}\text{C}$  NMR of  $N^1,N^1$ -diethyl-2,2-difluoro-4-methyl- $N^5$ -(*o*-tolyl)-4-(*p*-tolyl) pentanediamide (3l)**

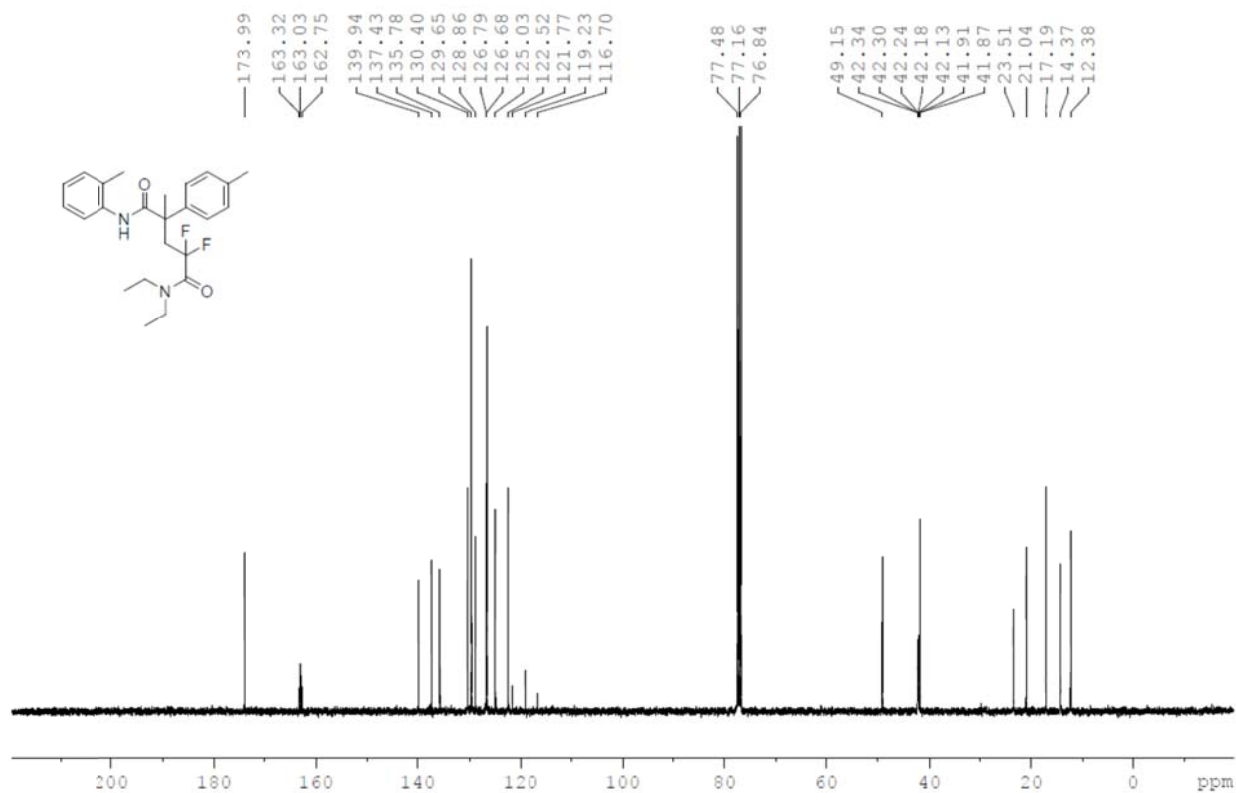

**$^{19}\text{F}$  NMR of  $N^1, N^1$ -diethyl-2,2-difluoro-4-methyl- $N^5$ -(*o*-tolyl)-4-(*p*-tolyl) pentanediamide (3l)**

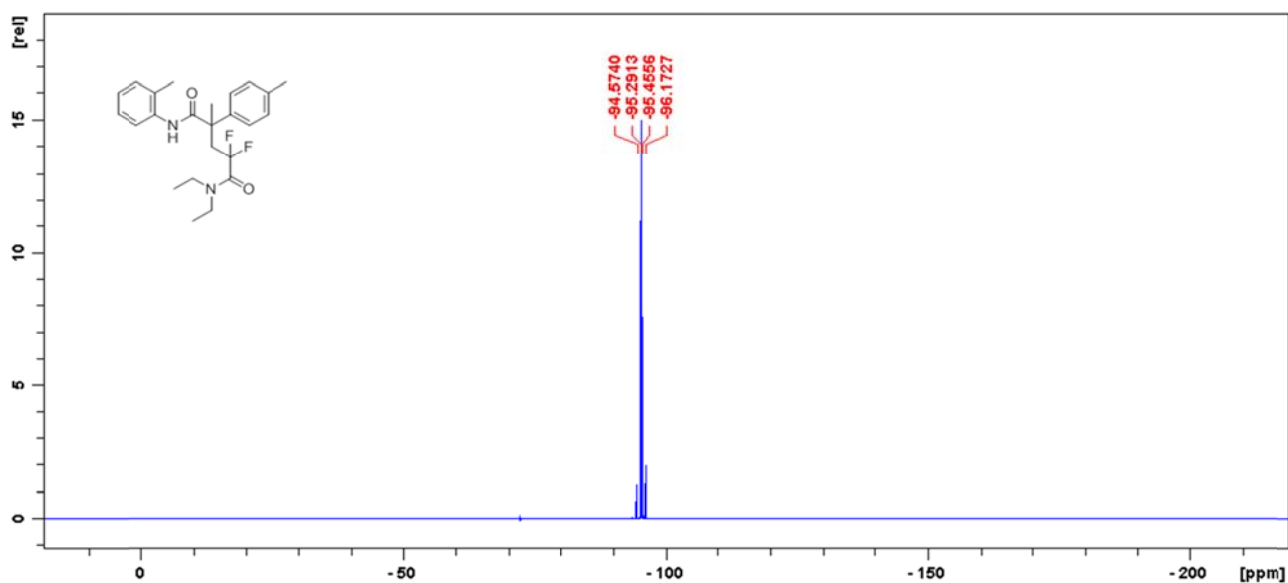

**$^1\text{H}$  NMR of  $N^1$ -(2-bromophenyl)- $N^5, N^5$ -diethyl-4,4-difluoro-2-methyl-2-(*p*-tolyl) pentanediamide (3m)**

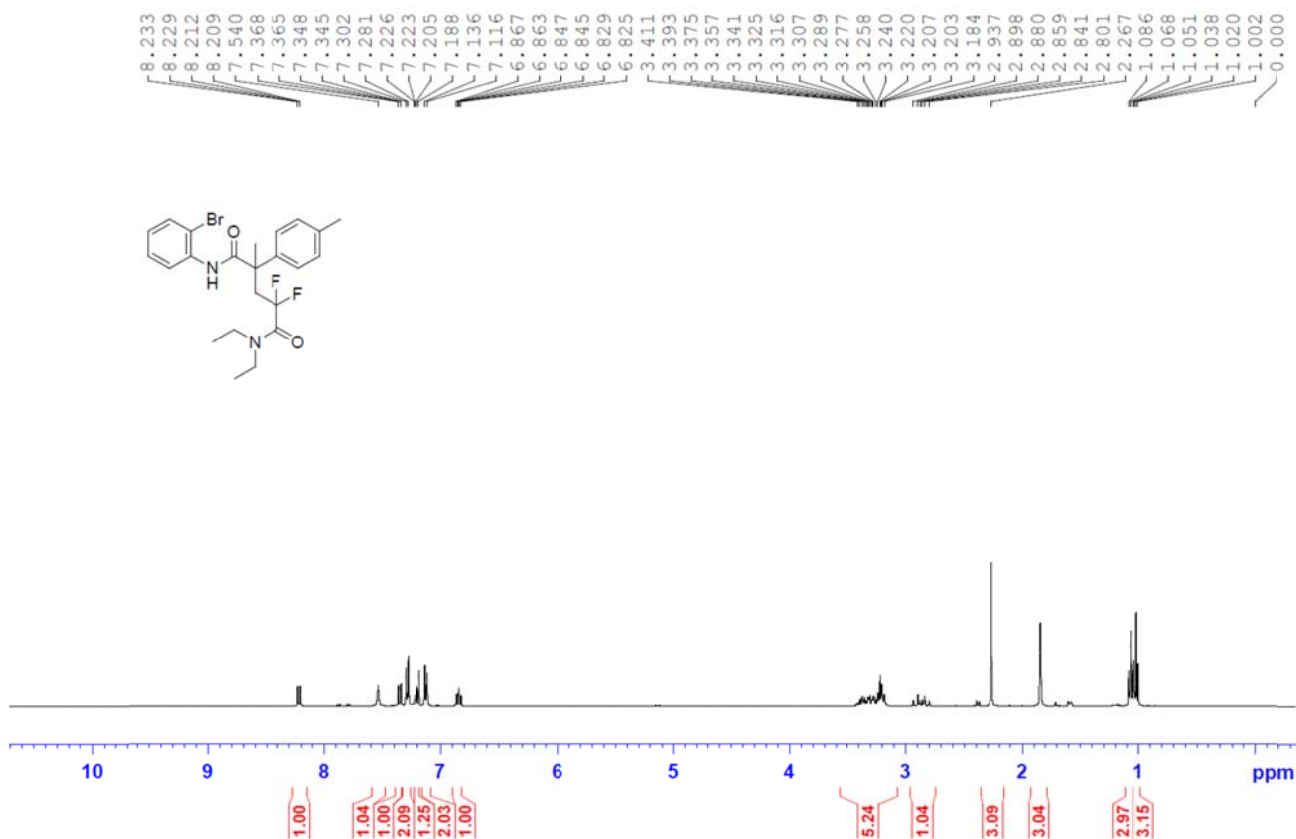



**$^{13}\text{C}$  NMR of  $N^1$ -(2-bromophenyl)- $N^5,N^5$ -diethyl-4,4-difluoro-2-methyl-2-(*p*-tolyl) pentanediamide (3m)**

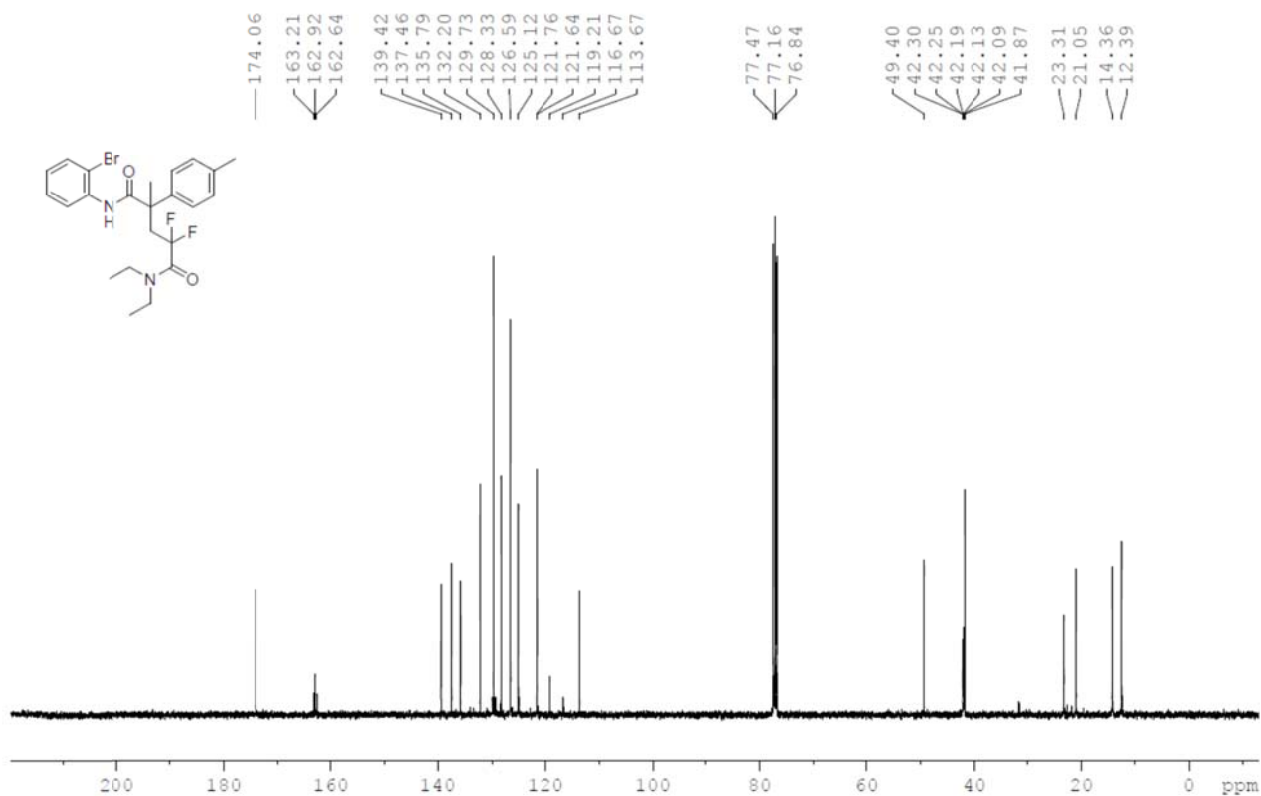

**$^{19}\text{F}$  NMR of  $N^1$ -(2-bromophenyl)- $N^5,N^5$ -diethyl-4,4-difluoro-2-methyl-2-(*p*-tolyl) pentanediamide (3m)**

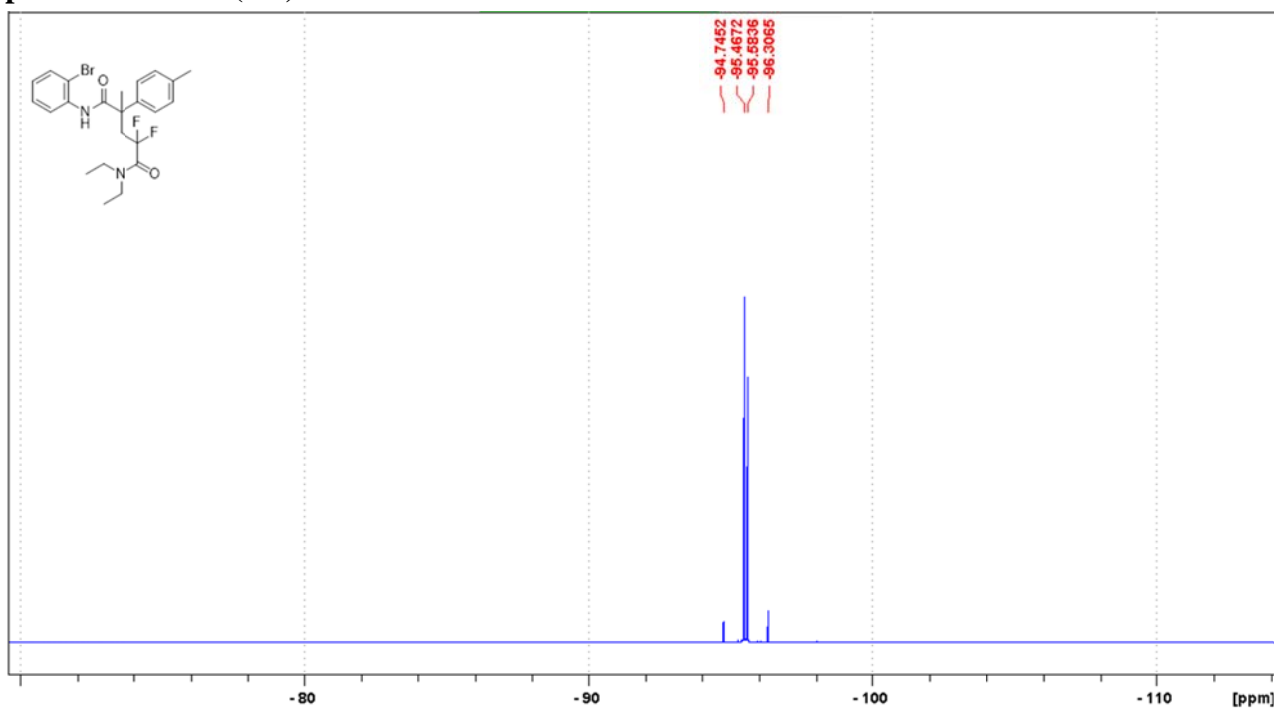

**<sup>1</sup>H NMR of *N*<sup>1</sup>-(2,4-dimethylphenyl)-*N*<sup>5</sup>,*N*<sup>5</sup>-diethyl-4,4-difluoro-2-methyl-2-(*p*-tolyl) pentanediamide (3o)**

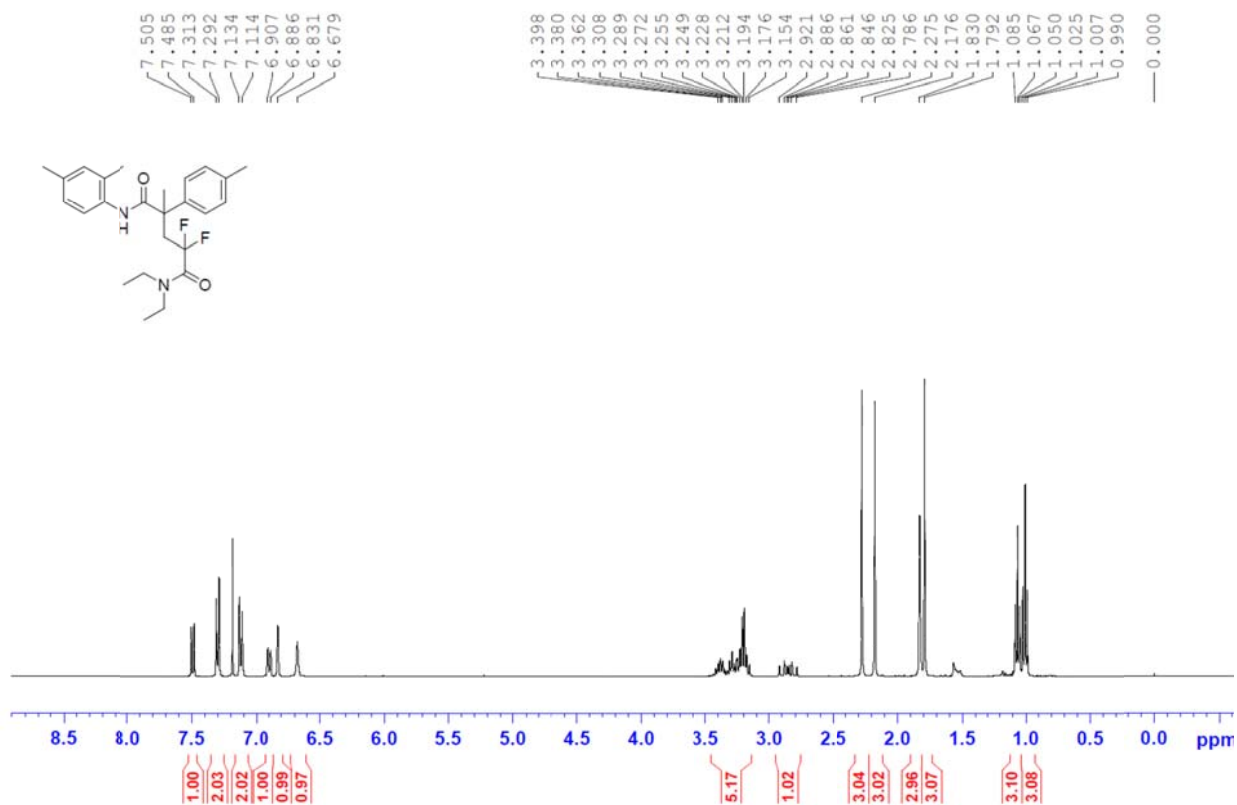

**<sup>13</sup>C NMR of *N*<sup>1</sup>-(2,4-dimethylphenyl)-*N*<sup>5</sup>,*N*<sup>5</sup>-diethyl-4,4-difluoro-2-methyl-2-(*p*-tolyl) pentanediamide (3o)**

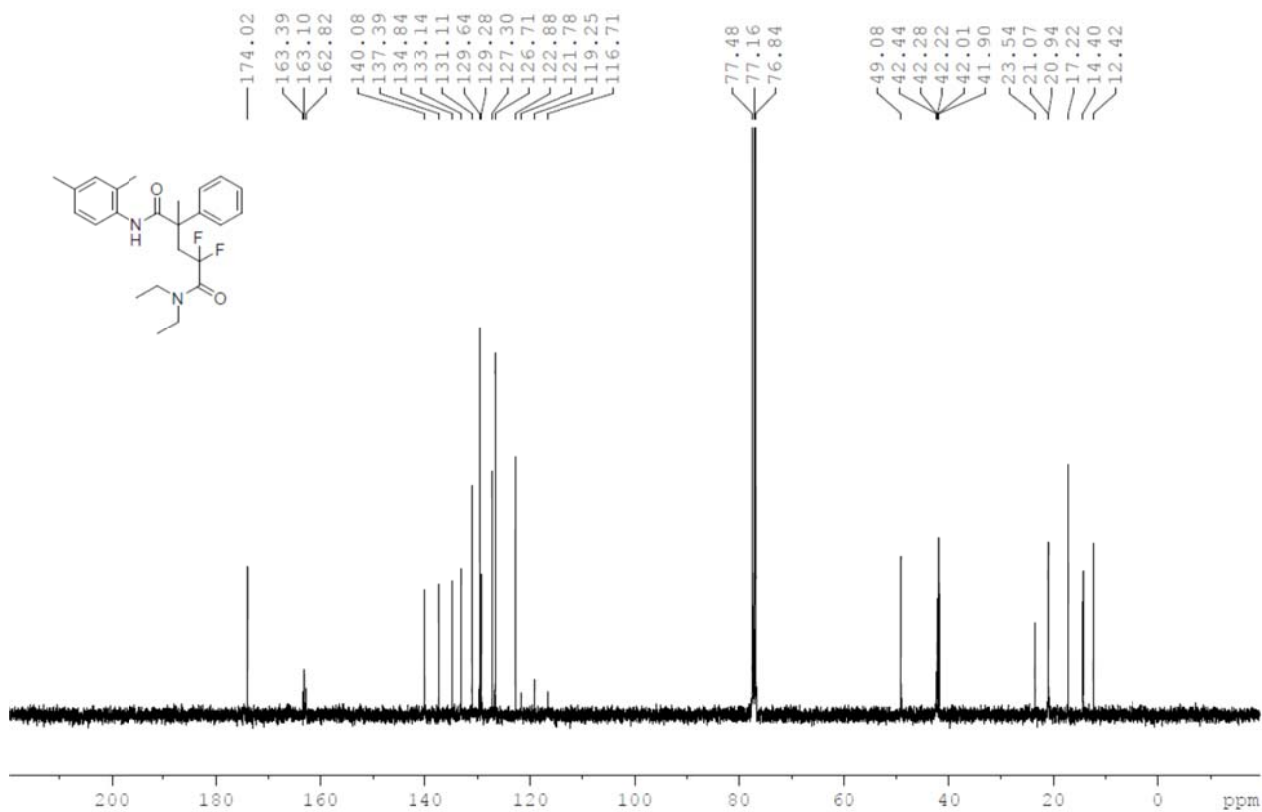

$^{19}\text{F}$  NMR of  $N^1$ -(2,4-dimethylphenyl)- $N^5,N^5$ -diethyl-4,4-difluoro-2-methyl-2-(*p*-tolyl) pentanediamide (3o)

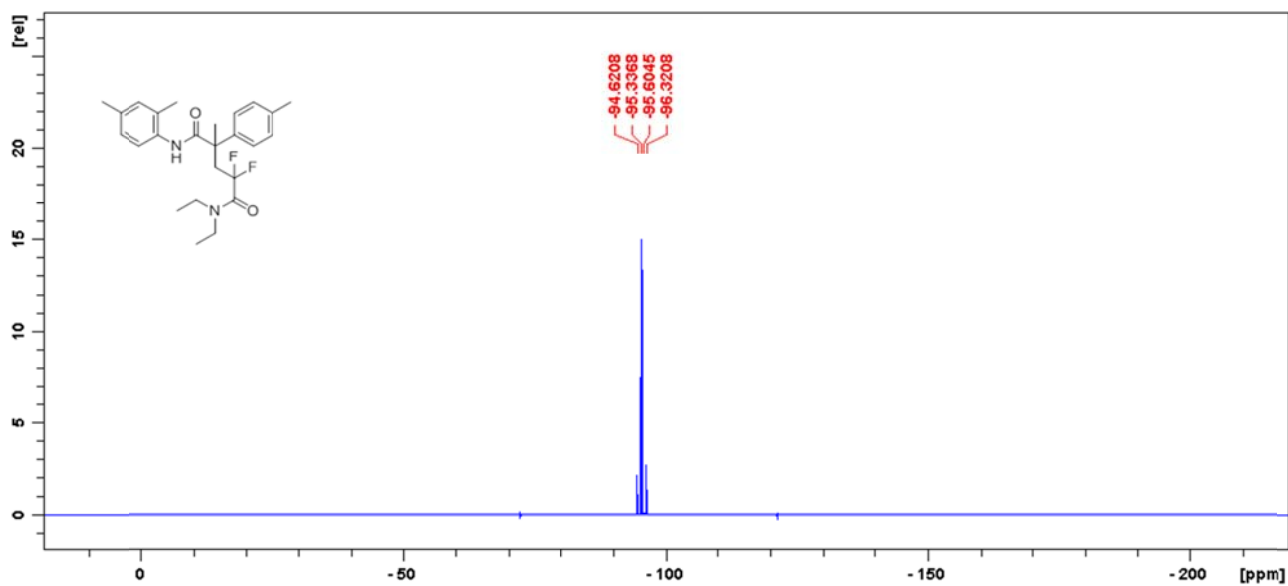

$^1\text{H}$  NMR of  $N^1,N^1$ -diethyl-2,2-difluoro-4-methyl- $N^5$ ,4-diphenylpentanediamide (3p)

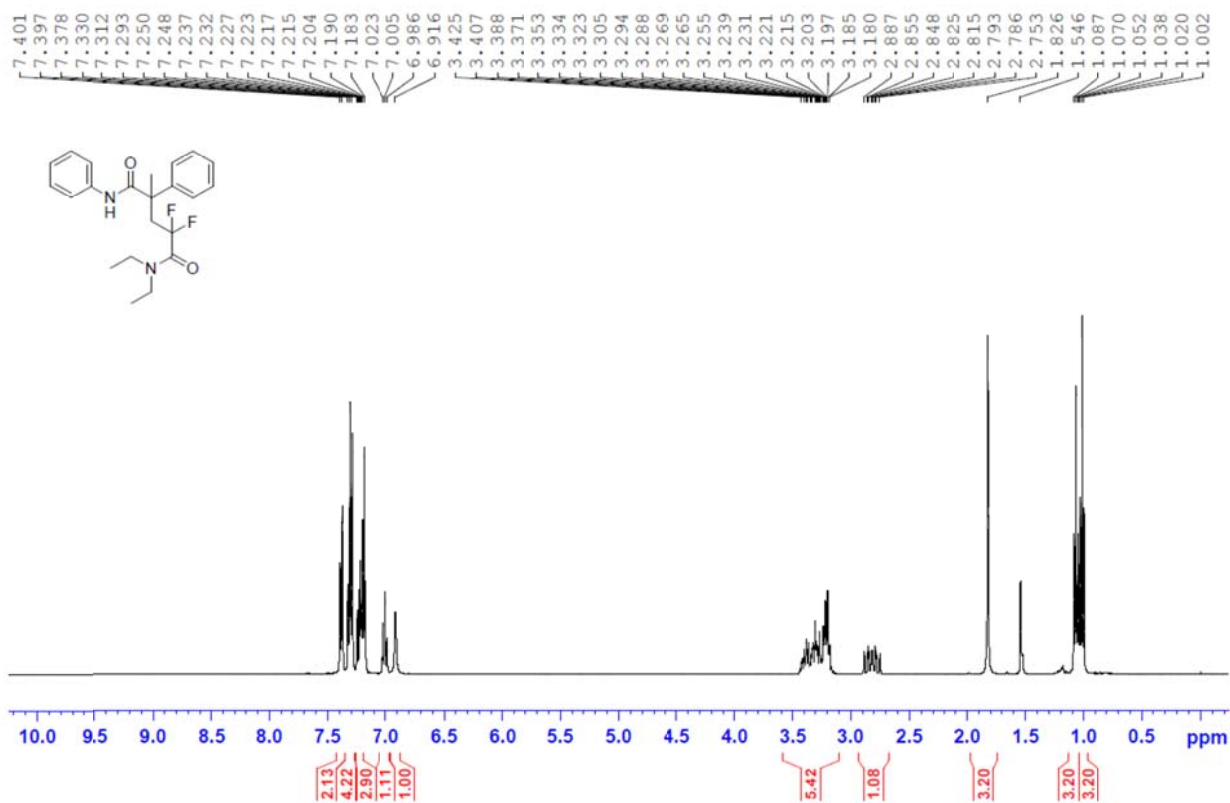

**$^{13}\text{C}$  NMR of  $N^1,N^1$ -diethyl-2,2-difluoro-4-methyl- $N^5$ ,4-diphenylpentanediamide (3p)**

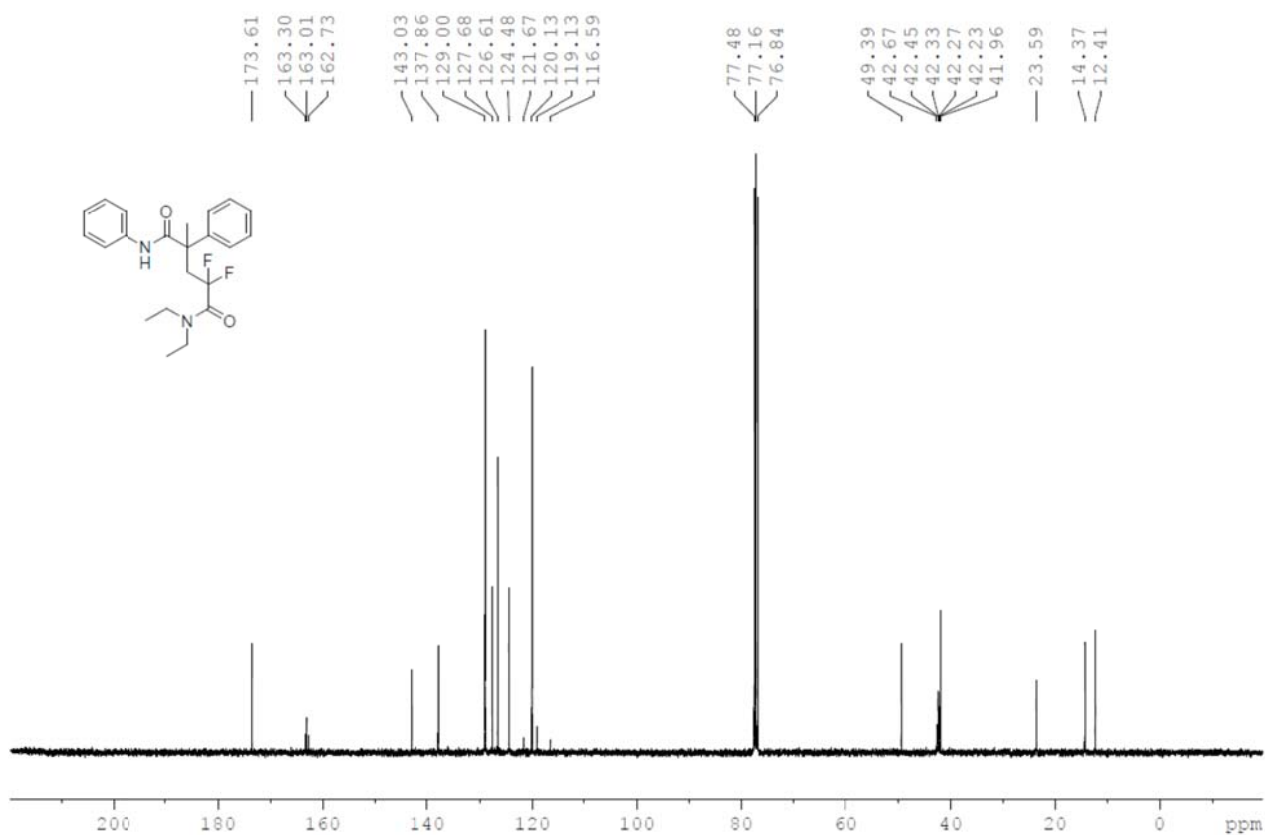

**$^{19}\text{F}$  NMR of  $N^1,N^1$ -diethyl-2,2-difluoro-4-methyl- $N^5$ ,4-diphenylpentanediamide (3p)**

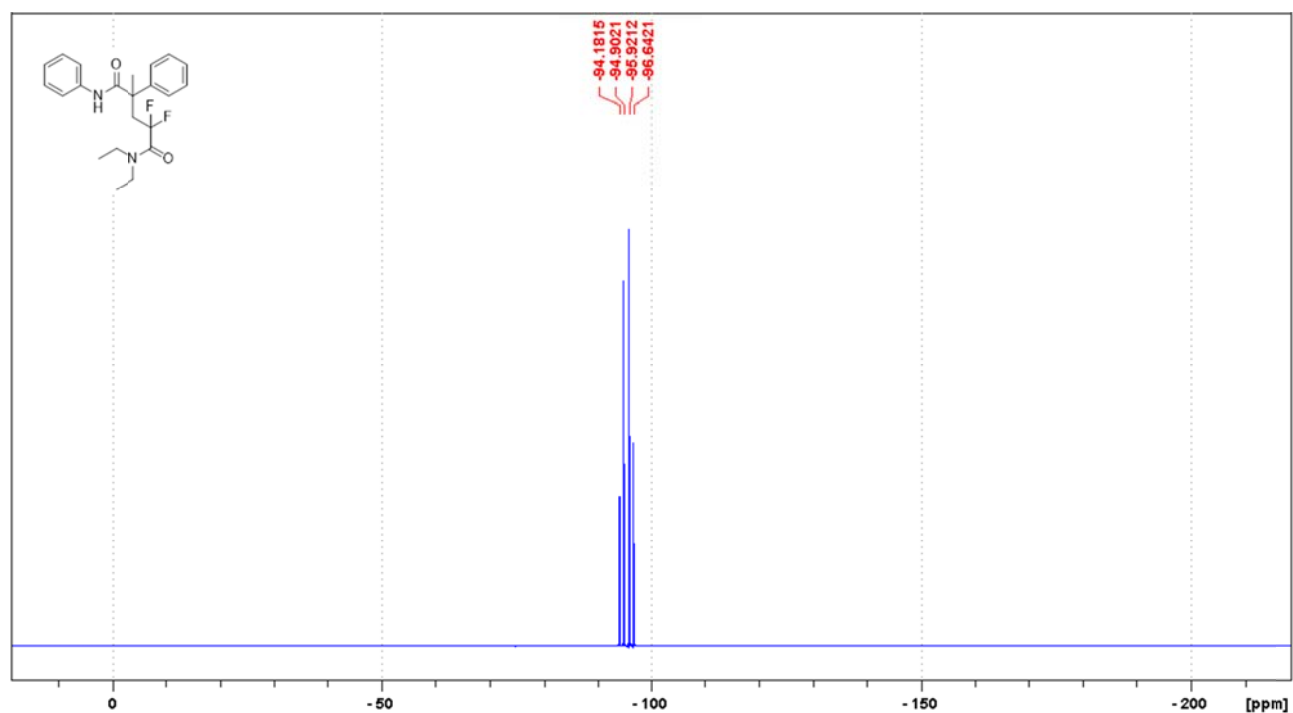

**<sup>1</sup>H NMR of 2-(4-chlorophenyl)-N<sup>5</sup>,N<sup>5</sup>-diethyl-4,4-difluoro-2-methyl-N<sup>1</sup>-phenylpentanediamide (3q)**

7.337, 7.332, 7.322, 7.315, 7.309, 7.304, 7.291, 7.285, 7.280, 7.269, 7.263, 7.233, 7.228, 7.214, 7.193, 7.190, 7.039, 7.036, 7.020, 7.002, 6.940, 3.425, 3.406, 3.388, 3.370, 3.354, 3.339, 3.321, 3.310, 3.303, 3.281, 3.270, 3.245, 3.228, 3.211, 3.193, 3.176, 3.176, 2.850, 2.817, 2.810, 2.788, 2.778, 2.756, 2.749, 2.716, 1.802, 1.095, 1.077, 1.060, 1.041, 1.024

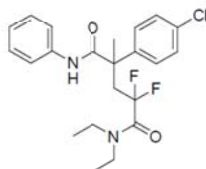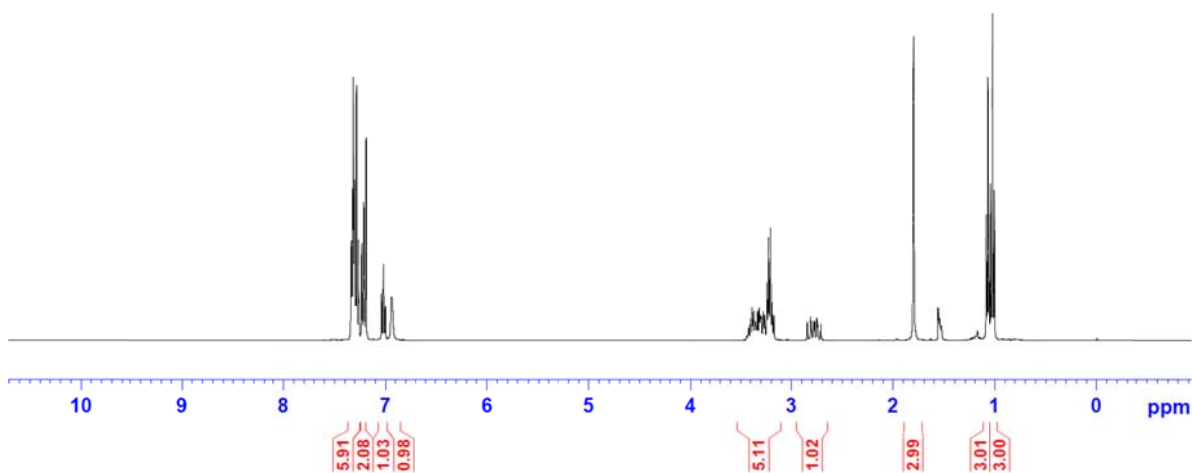

**<sup>13</sup>C NMR of 2-(4-chlorophenyl)-N<sup>5</sup>,N<sup>5</sup>-diethyl-4,4-difluoro-2-methyl-N<sup>1</sup>-phenylpentanediamide (3q)**

173.03, 163.15, 162.86, 162.58, 141.64, 137.70, 133.62, 129.08, 129.03, 128.08, 124.66, 121.61, 120.22, 119.07, 116.52, 77.48, 77.16, 76.84, 48.97, 42.65, 42.44, 42.31, 42.25, 41.97, 23.58, 14.37, 12.39

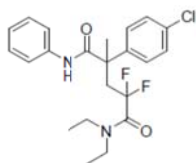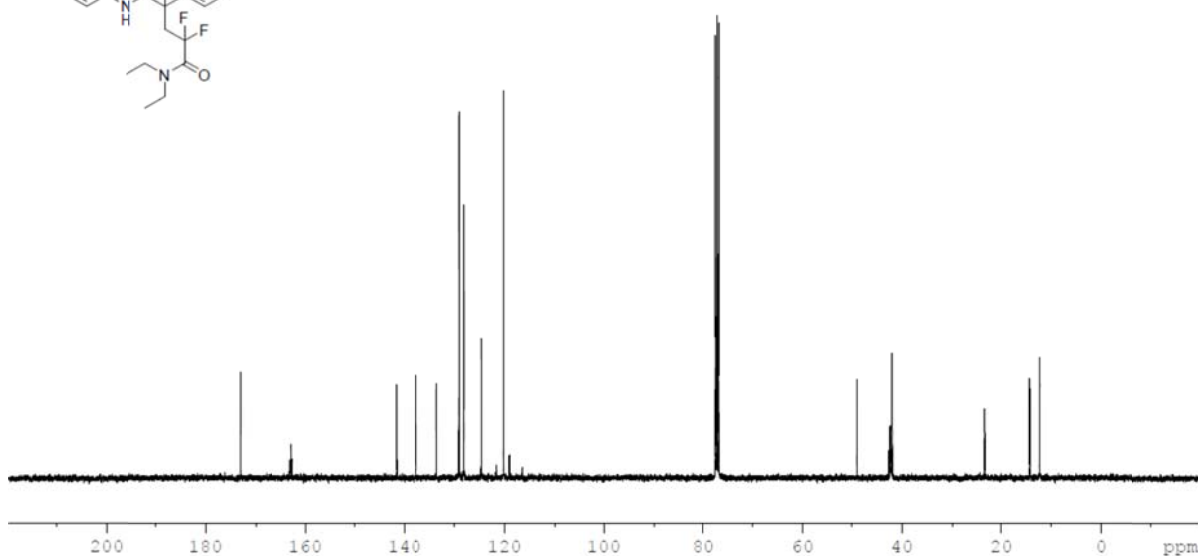

**$^{19}\text{F}$  NMR of 2-(4-chlorophenyl)- $N^5,N^5$ -diethyl-4,4-difluoro-2-methyl- $N^1$ -phenylpentanediamide (3q)**

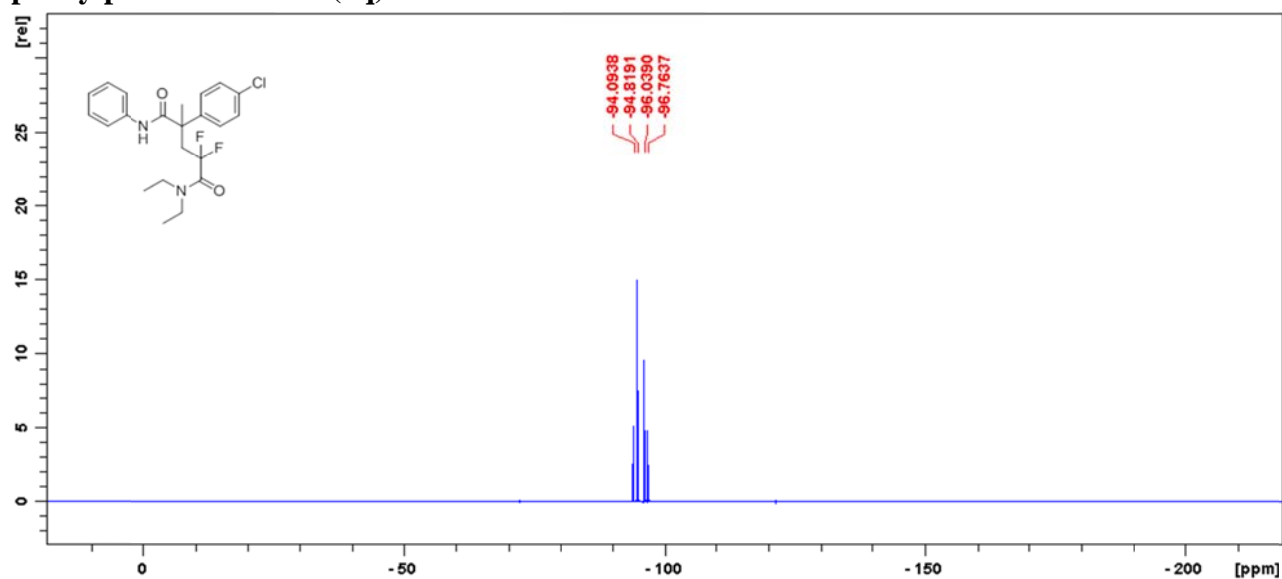

**$^1\text{H}$  NMR of 4,4-difluoro-2-methyl-5-oxo- $N$ -phenyl-5-(pyrrolidin-1-yl)-2-( $p$ -tolyl) pentanamide (3r)**

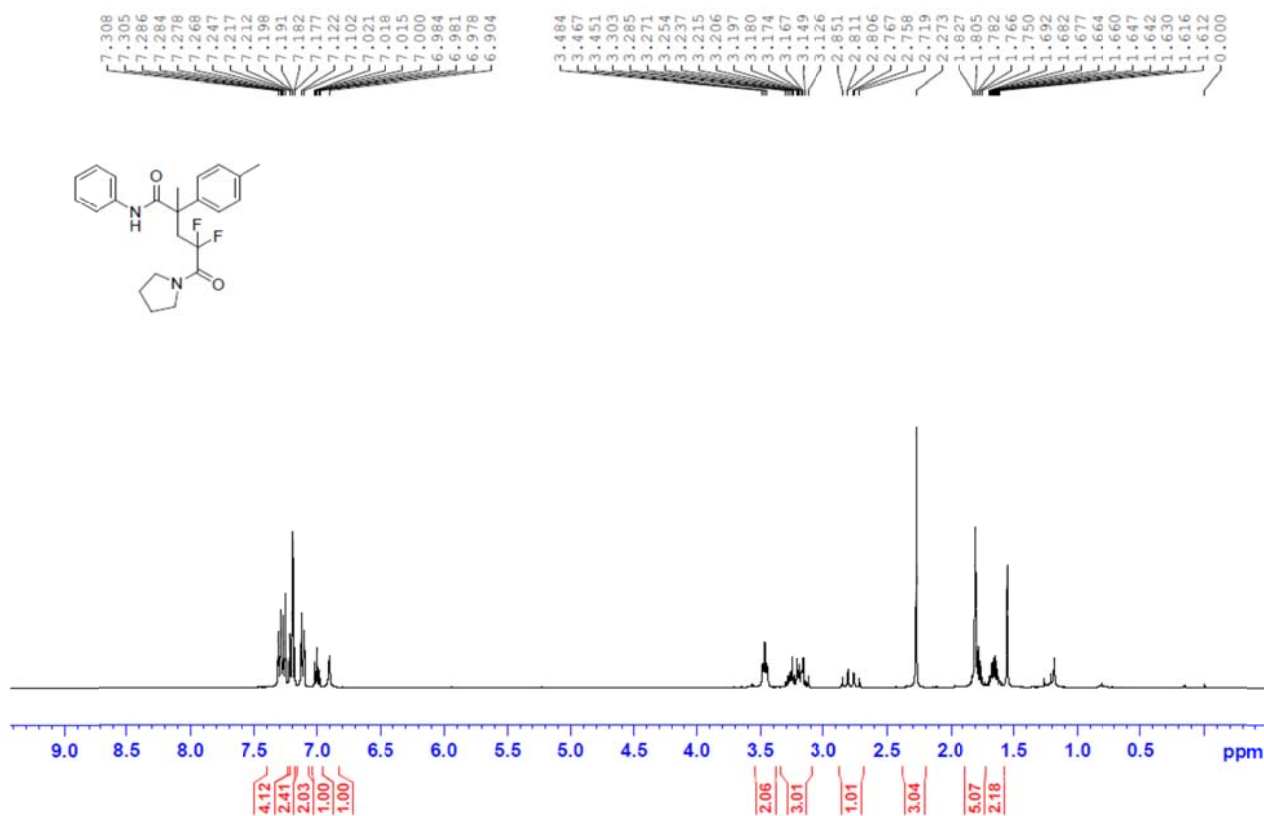

**<sup>13</sup>C NMR of 4,4-difluoro-2-methyl-5-oxo-N-phenyl-5-(pyrrolidin-1-yl)-2-(p-tolyl) pentanamide (3r)**

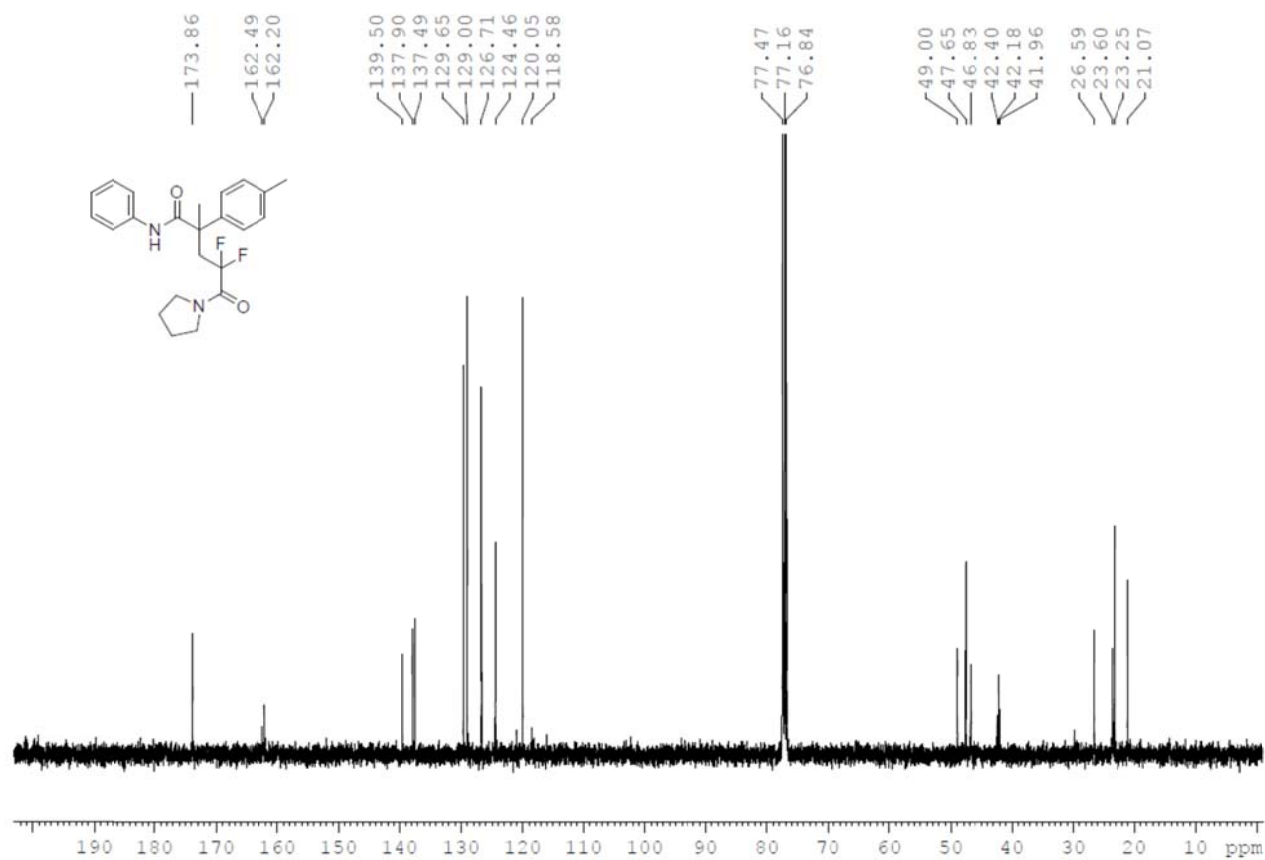

**<sup>19</sup>F NMR of 4,4-difluoro-2-methyl-5-oxo-N-phenyl-5-(pyrrolidin-1-yl)-2-(p-tolyl) pentanamide (3r)**

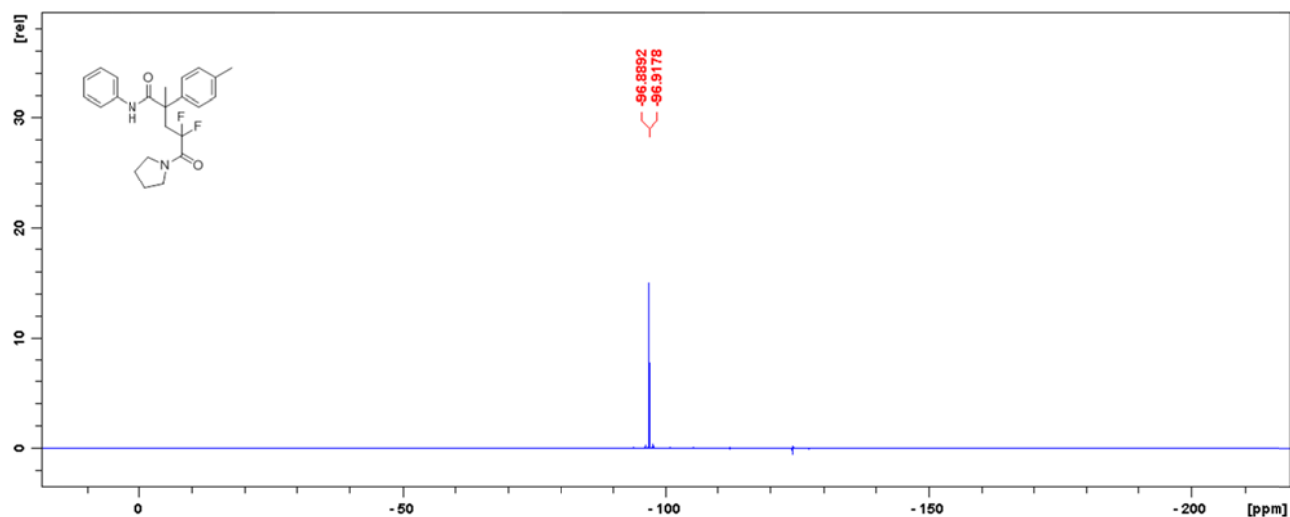

**<sup>1</sup>H NMR of 4,4-difluoro-2-methyl-5-oxo-N-phenyl-5-(piperidin-1-yl)-2-(p-tolyl) pentanamide (3s)**

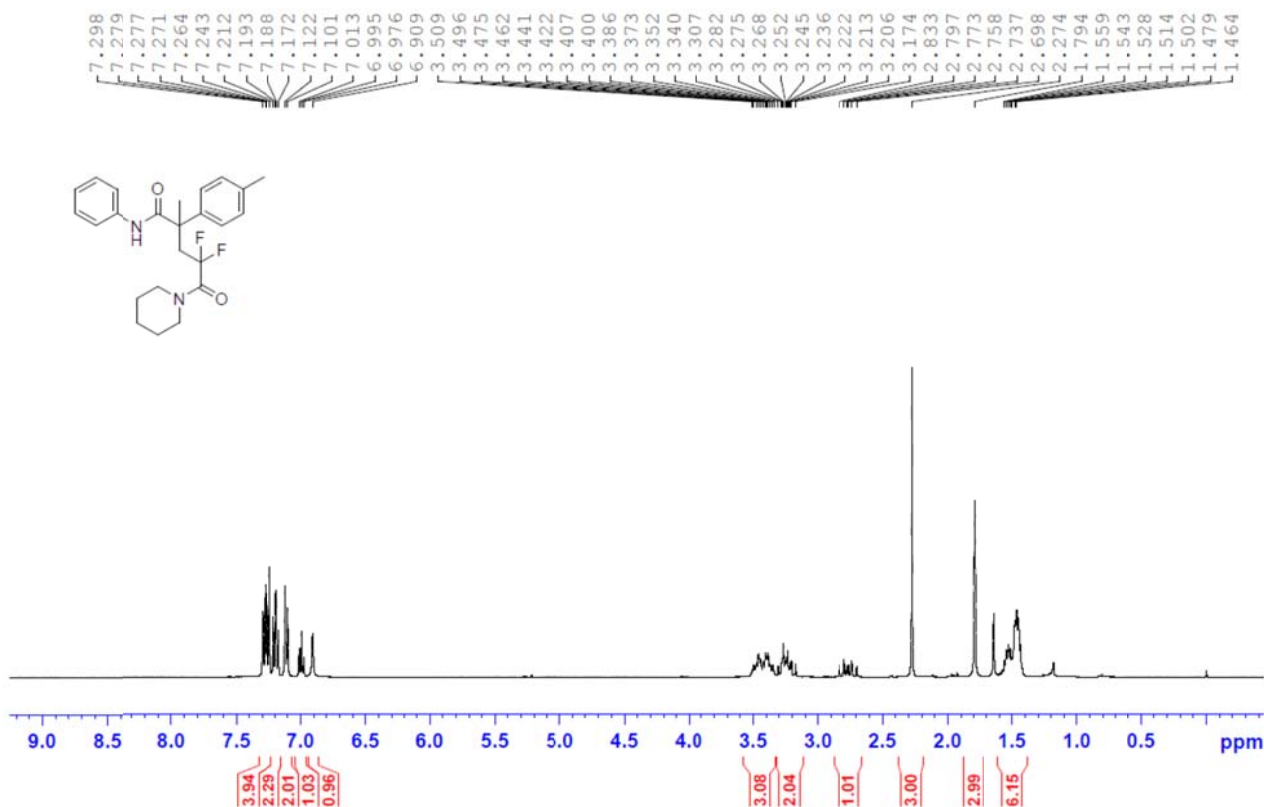

**<sup>13</sup>C NMR of 4,4-difluoro-2-methyl-5-oxo-N-phenyl-5-(piperidin-1-yl)-2-(p-tolyl) pentanamide (3s)**

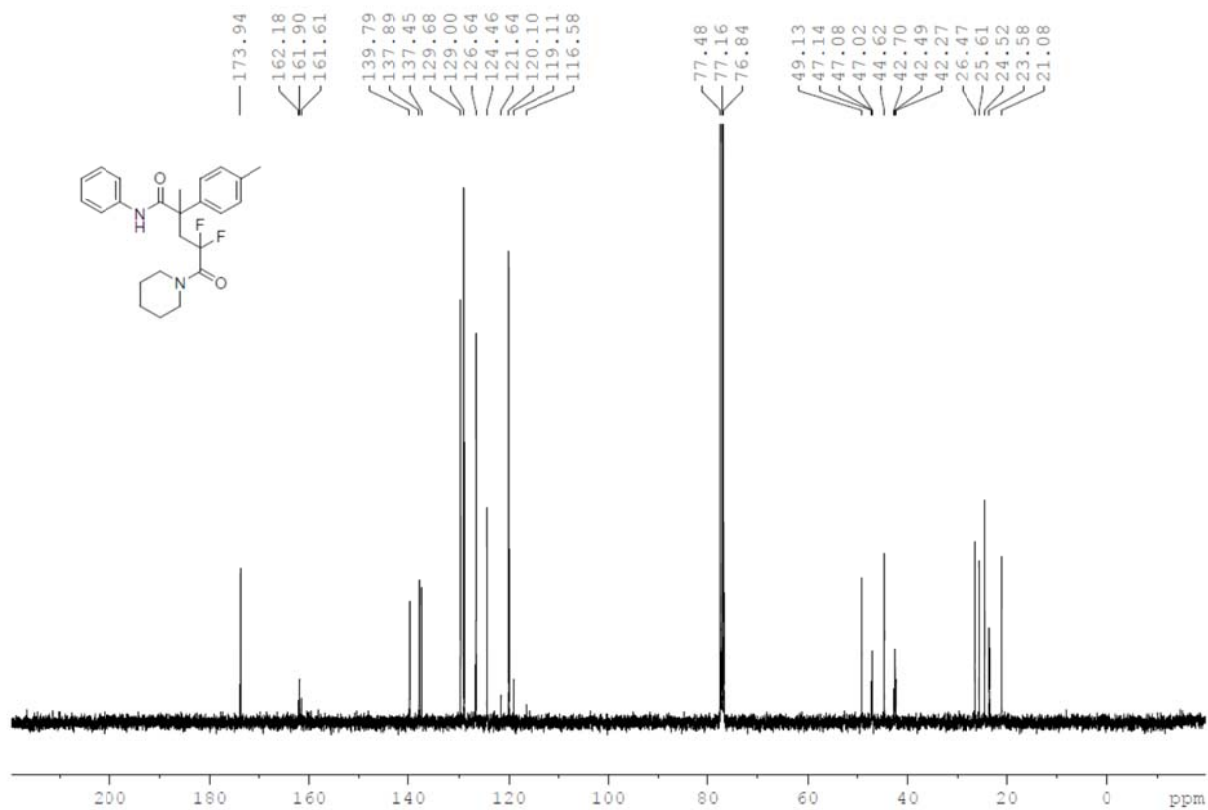



**<sup>19</sup>F NMR of 4,4-difluoro-2-methyl-5-oxo-N-phenyl-5-(piperidin-1-yl)-2-(p-tolyl) pentanamide (3s)**

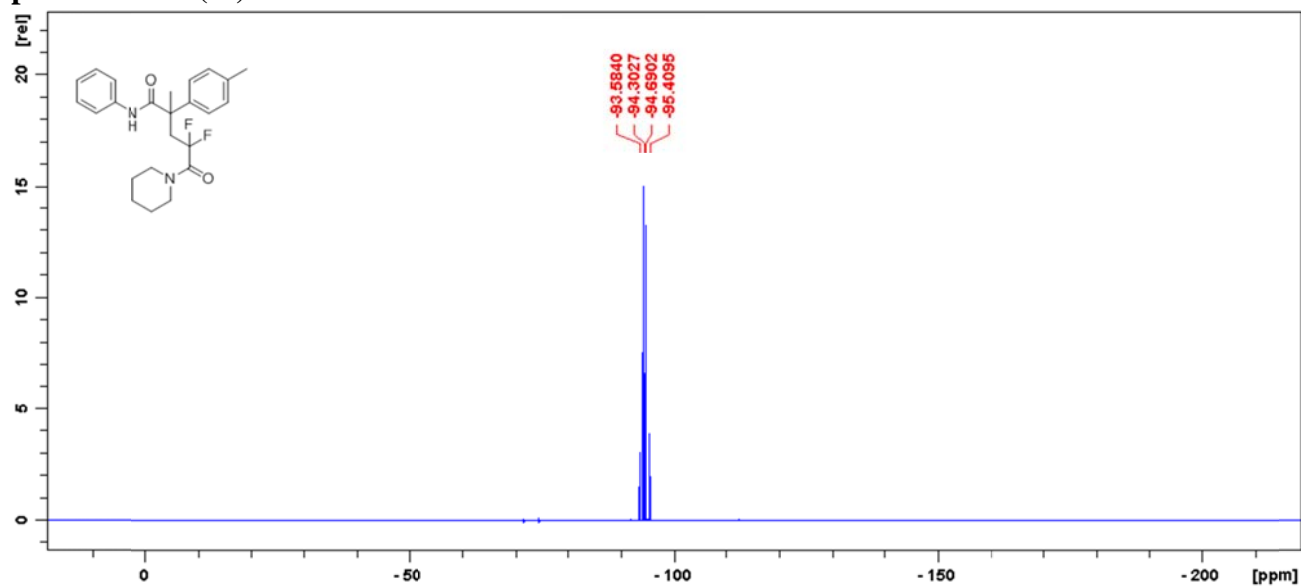

**<sup>1</sup>H NMR of 4,4-difluoro-2-methyl-5-morpholino-5-oxo-N-phenyl-2-(p-tolyl) pentanamide (3t)**

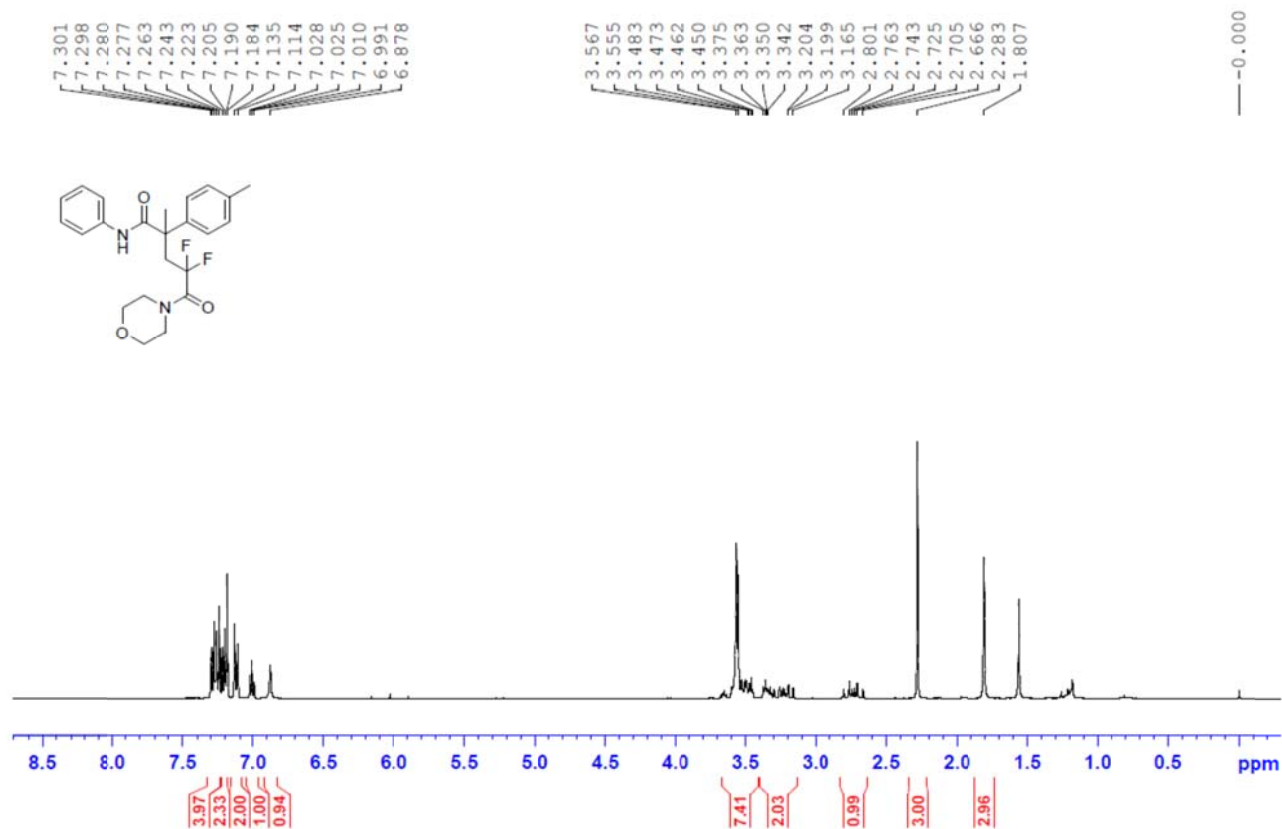

**<sup>13</sup>C NMR of 4,4-difluoro-2-methyl-5-morpholino-5-oxo-N-phenyl-2-(p-tolyl) pentanamide (3t)**

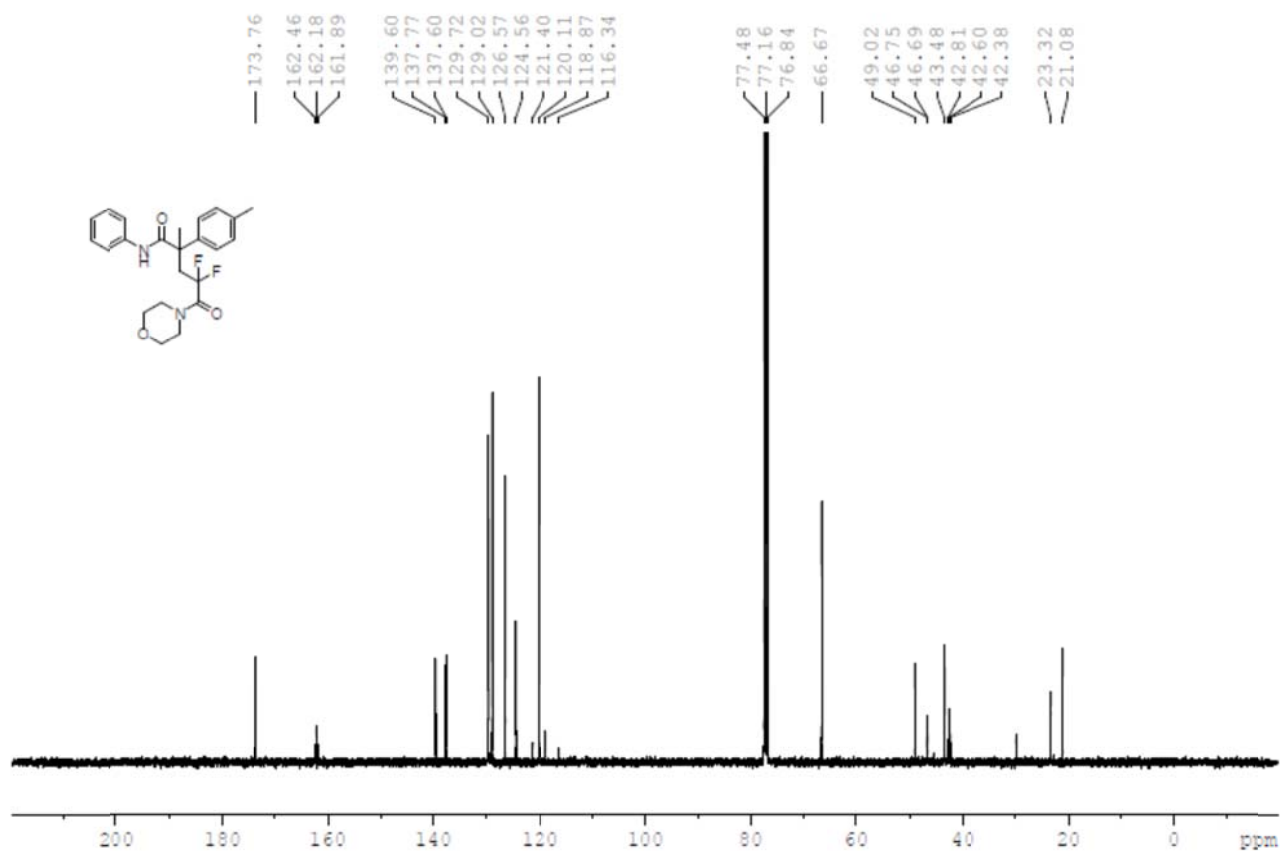

**<sup>19</sup>F NMR of 4,4-difluoro-2-methyl-5-morpholino-5-oxo-N-phenyl-2-(p-tolyl) pentanamide (3t)**

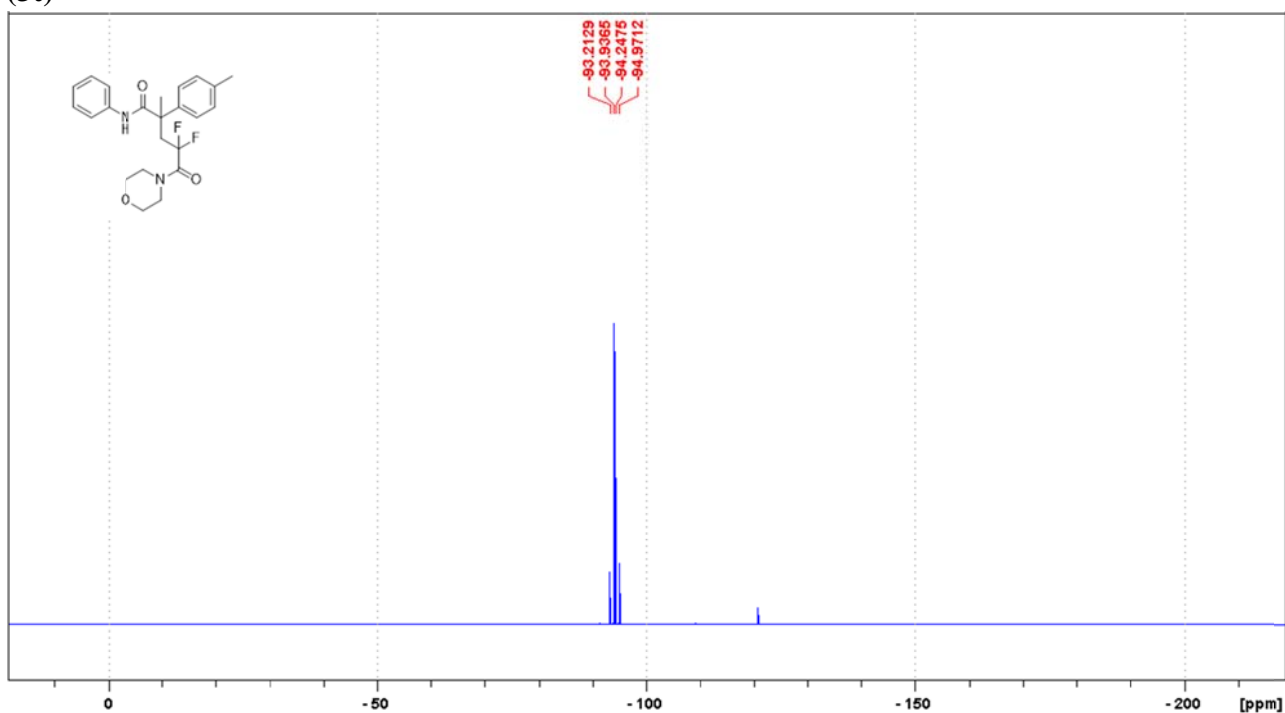

**$^1\text{H}$  NMR of 2,2-difluoro-4-methyl- $N^1,N^1$ -dipentyl- $N^5$ -phenyl-4-(*p*-tolyl) pentanediamide (3u)**

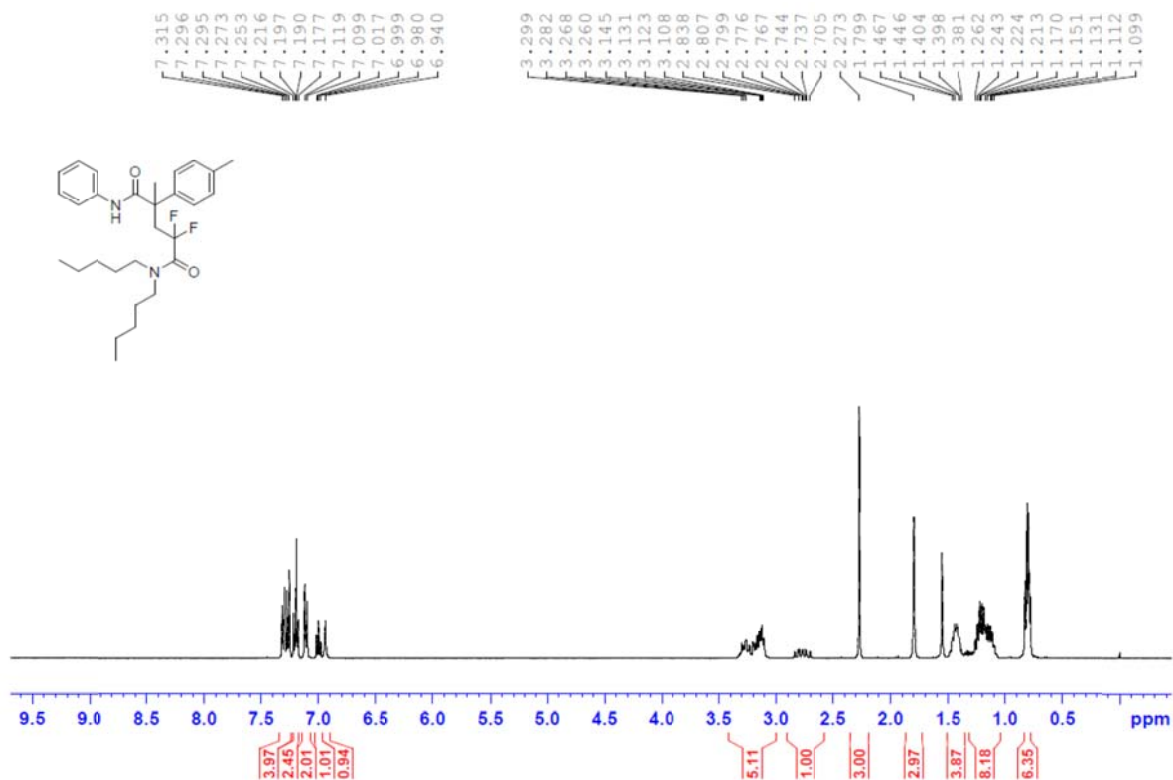

**$^{13}\text{C}$  NMR of 2,2-difluoro-4-methyl- $N^1,N^1$ -dipentyl- $N^5$ -phenyl-4-(*p*-tolyl) pentanediamide (3u)**

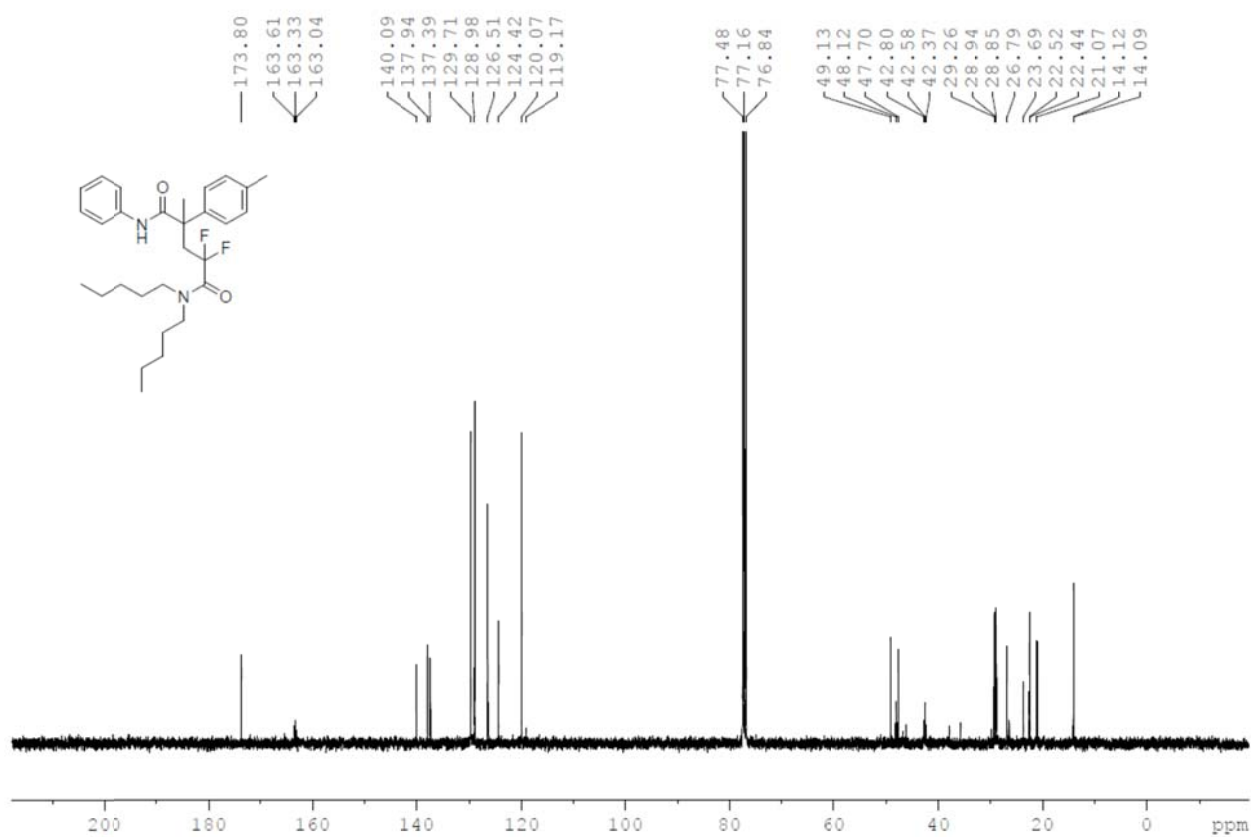

**$^{19}\text{F}$  NMR of 2,2-difluoro-4-methyl- $N^1,N^1$ -dipentyl- $N^5$ -phenyl-4-(*p*-tolyl) pentanediamide (3u)**

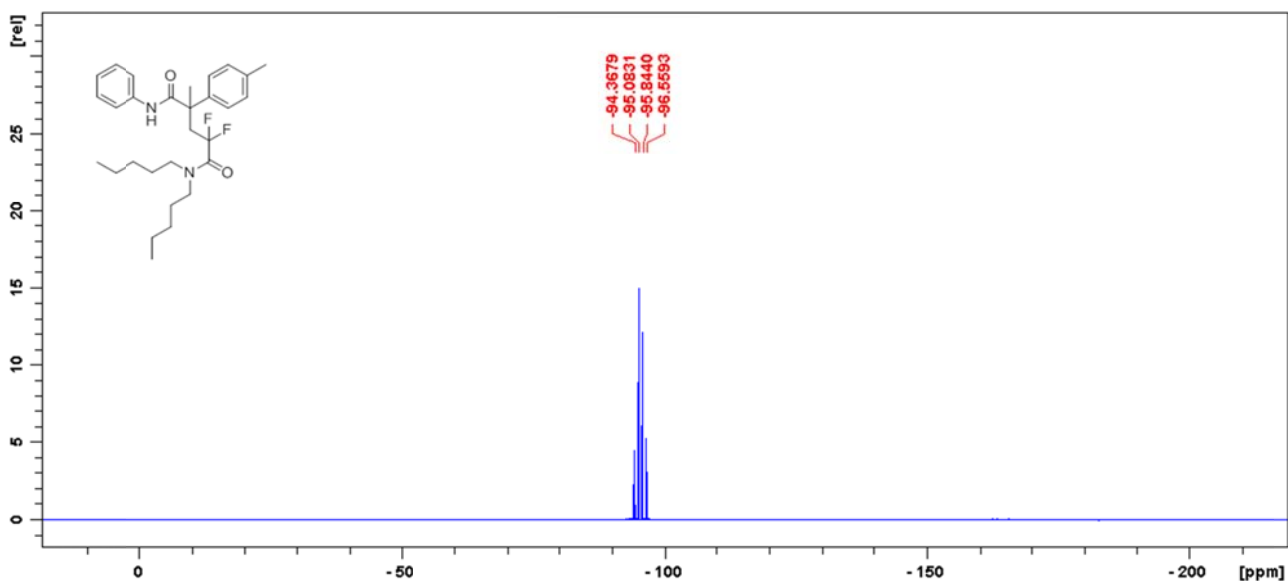

**$^1\text{H}$  NMR of ethyl 2,2-difluoro-4-methyl-5-oxo-5-(phenylamino)-4-(*p*-tolyl) pentanoate (3v)**

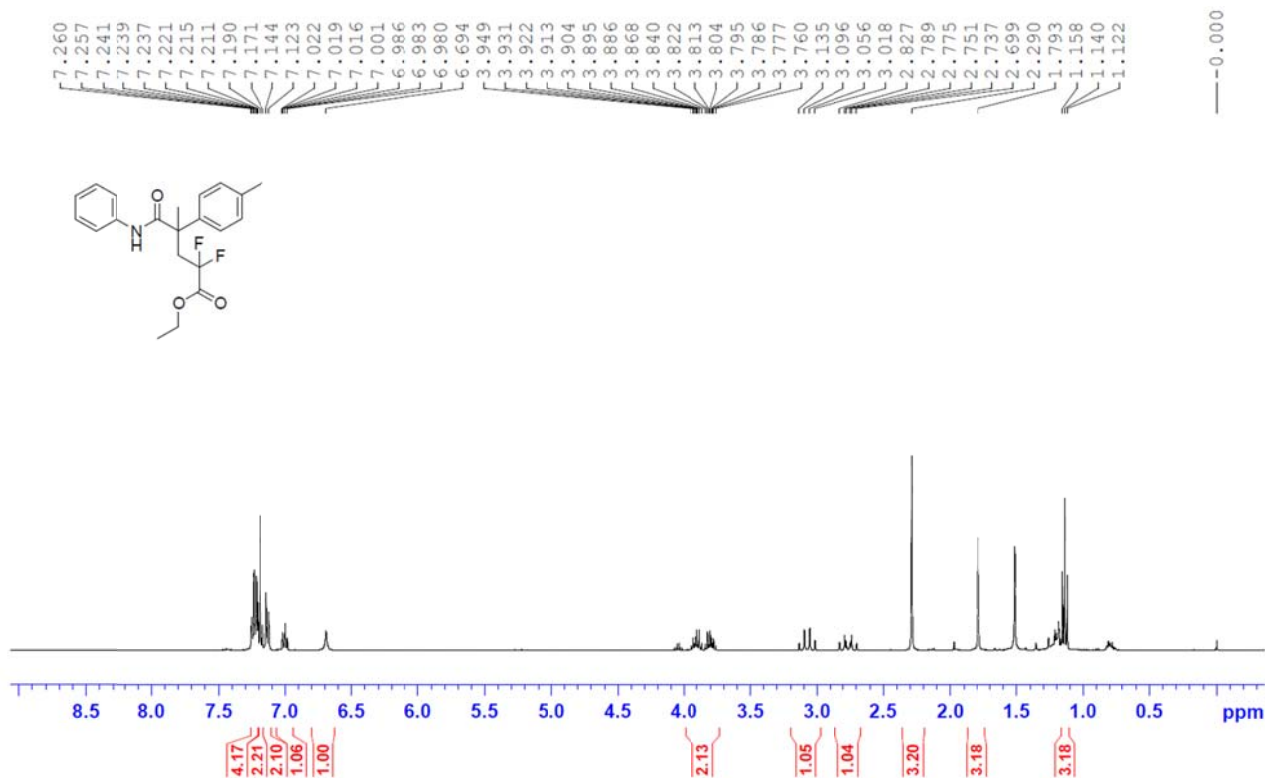

**<sup>13</sup>C NMR of ethyl 2,2-difluoro-4-methyl-5-oxo-5-(phenylamino)-4-(*p*-tolyl) pentanoate (3v)**

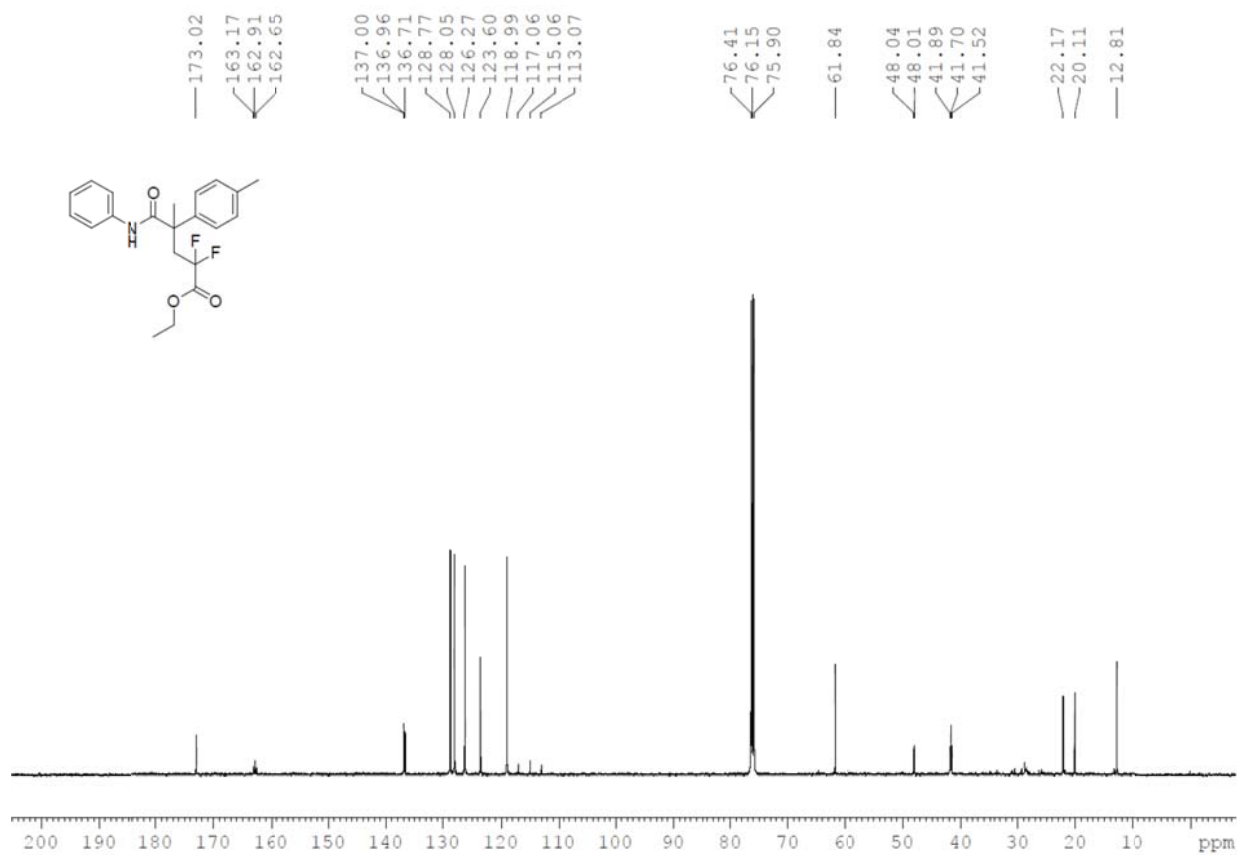

**<sup>19</sup>F NMR of ethyl 2,2-difluoro-4-methyl-5-oxo-5-(phenylamino)-4-(*p*-tolyl) pentanoate (3v)**

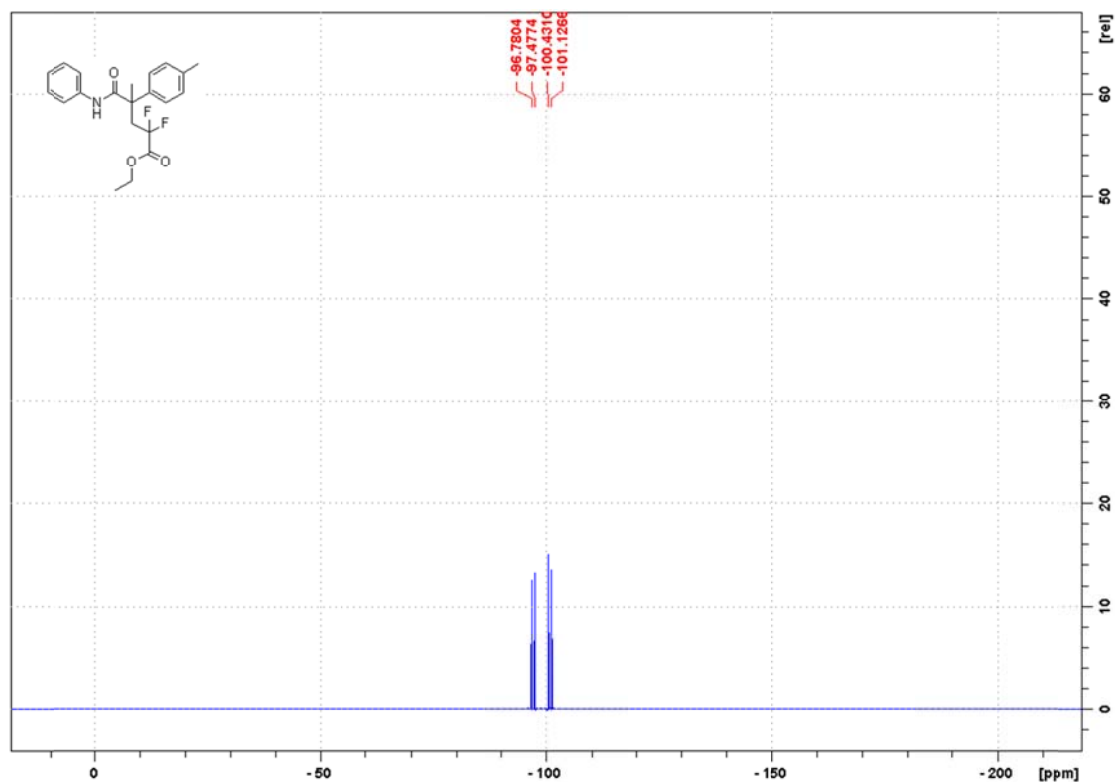

**<sup>1</sup>H NMR of Methyl 2,2-difluoro-4-methyl-5-oxo-5-(phenylamino)-4-(*p*-tolyl) pentanoate (4)**

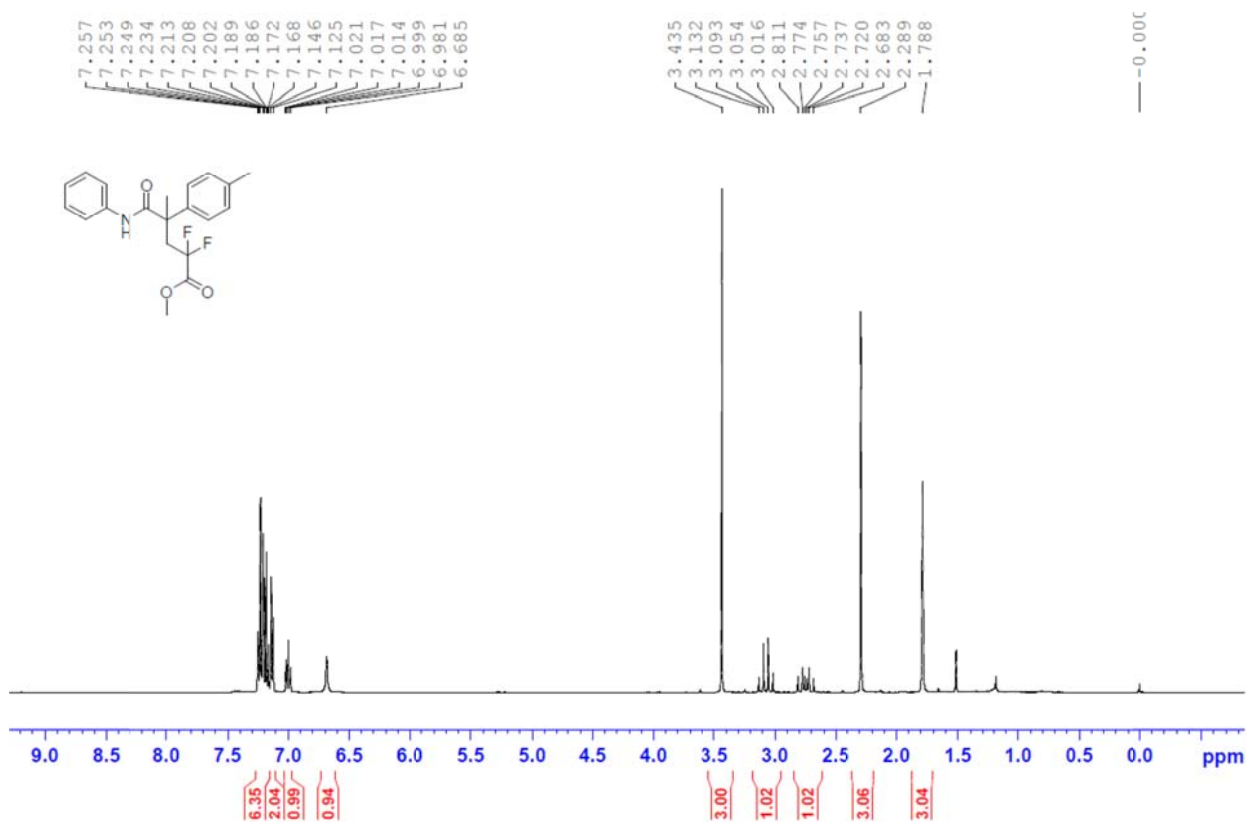

**<sup>13</sup>C NMR of Methyl 2,2-difluoro-4-methyl-5-oxo-5-(phenylamino)-4-(*p*-tolyl) pentanoate (4)**

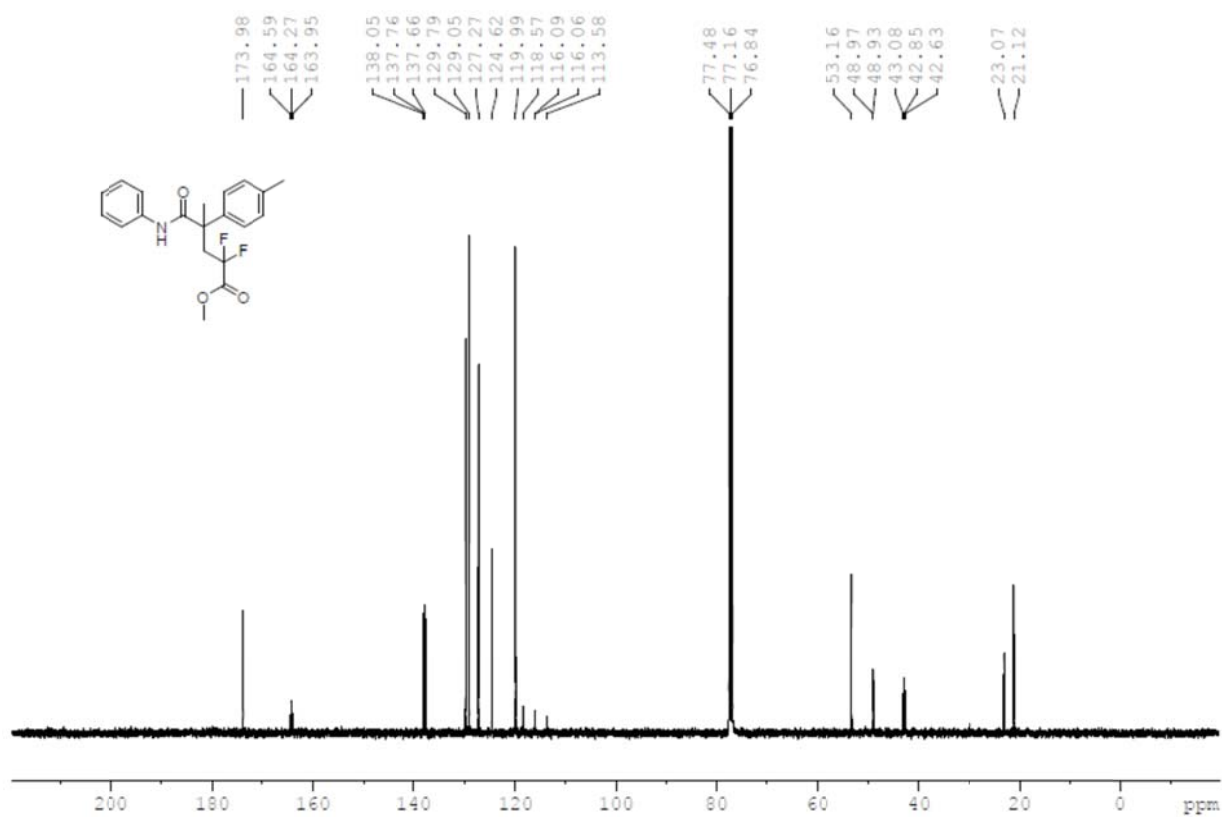

**$^{19}\text{F}$  NMR of Methyl 2,2-difluoro-4-methyl-5-oxo-5-(phenylamino)-4-(*p*-tolyl) pentanoate (4)**

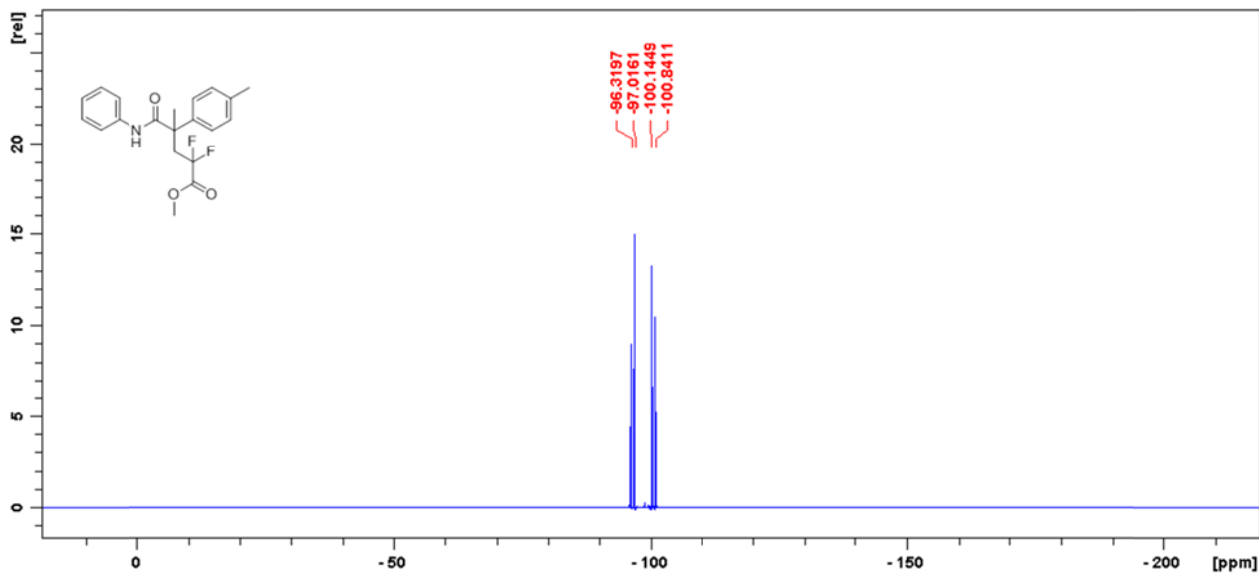

**$^1\text{H}$  NMR of 4,4-difluoro-5-hydroxy-2-methyl-N-phenyl-2-(*p*-tolyl)pentanamide (5)**

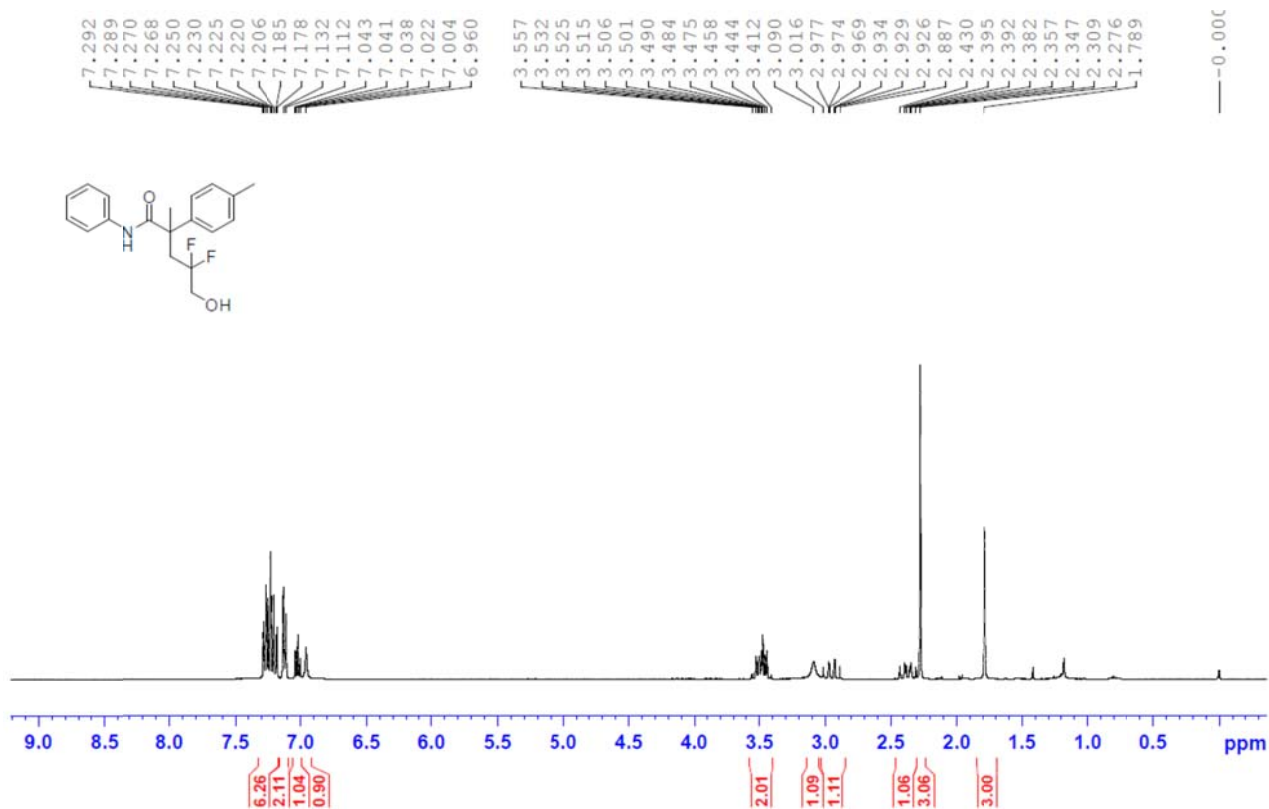

<sup>13</sup>C NMR of 4,4-difluoro-5-hydroxy-2-methyl-N-phenyl-2-(*p*-tolyl)pentanamide (5)

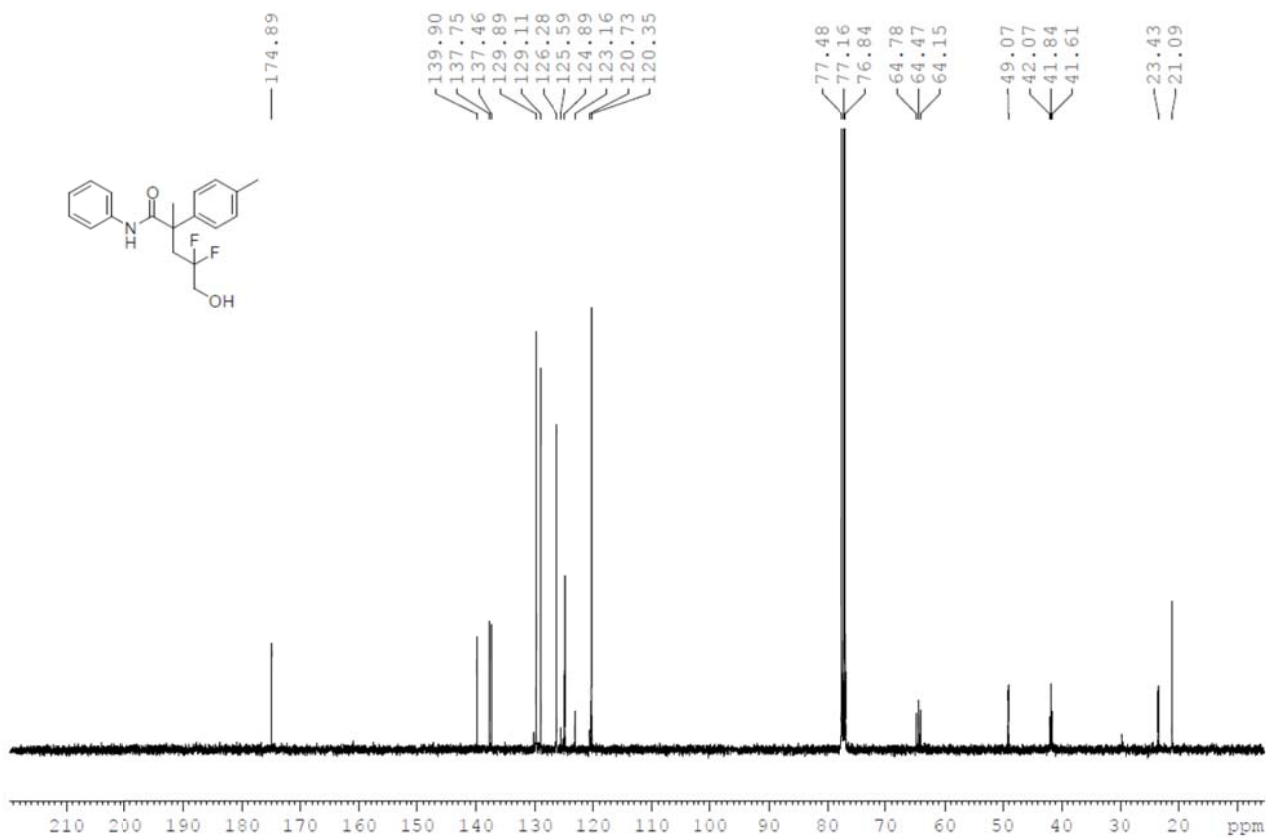

<sup>19</sup>F NMR of 4,4-difluoro-5-hydroxy-2-methyl-N-phenyl-2-(*p*-tolyl)pentanamide (5)

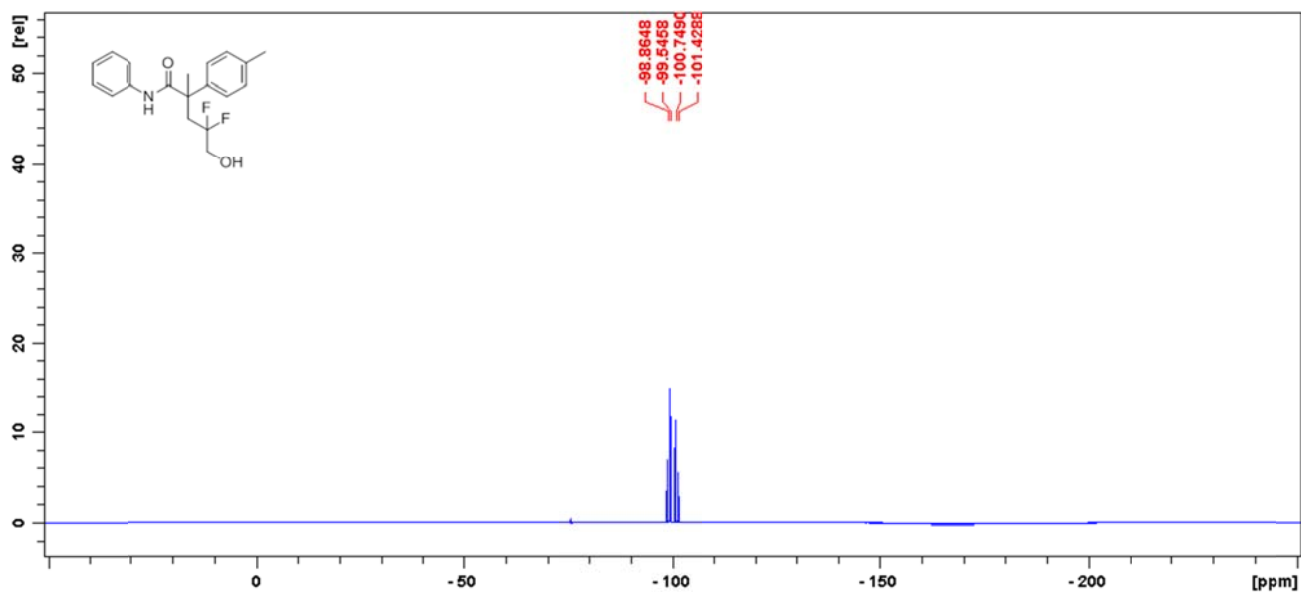

Supplement: c7qo00209b1.pdf [file c7qo00209b1.pdf]
